# Supplementary material for: Consecutive Lossen rearrangement/transamidation reaction of hydroxamic acids under catalyst- and additive-free conditions
Source: Royal Society of Chemistry journal article supplement (doi:10.1039/c8ob00490k), 2018-01-01
Supplement: c8ob00490k1.pdf [file c8ob00490k1.pdf]

## ***Supporting Information***

### **Consecutive Lossen rearrangement/transamidation reaction of hydroxamic acids under catalyst- and additive-free conditions**

Mengmeng Jia,<sup>a</sup> Heng Zhang,<sup>a</sup> Yongjia Lin,<sup>a</sup> Dimei Chen,<sup>a</sup> Yanmei Chen,<sup>b</sup> and Yuanzhi Xia<sup>a,b,\*</sup>

<sup>a</sup> College of Chemistry and Materials Engineering, Wenzhou University, Wenzhou 325035, China

<sup>b</sup> Hubei Key Laboratory of Processing and Application of Catalytic materials, Huanggang Normal  
University, Huanggang 438000, China

E-mail: xyz@wzu.edu.cn

#### **Content:**

- 1. Predicted Energies for Generation of 1a' with Diformylimide**
- 2. Calculated Cartesian Coordinates and Energies**
- 3. Copy of NMR Spectra**

## 1. Predicted Energies for Generation of 1a' with Diformylimide

Calculations were done to investigate the possible generation of diformylimide (**6**) as a formylating agent to form **1a'**, however, the energy would be as high as 44.0 via a 6-membered ring TS (**TSa**). This energy is much higher than that shown in Scheme 2, indicating the diformylimide **6** should not be an efficient formylating agent in the reaction.

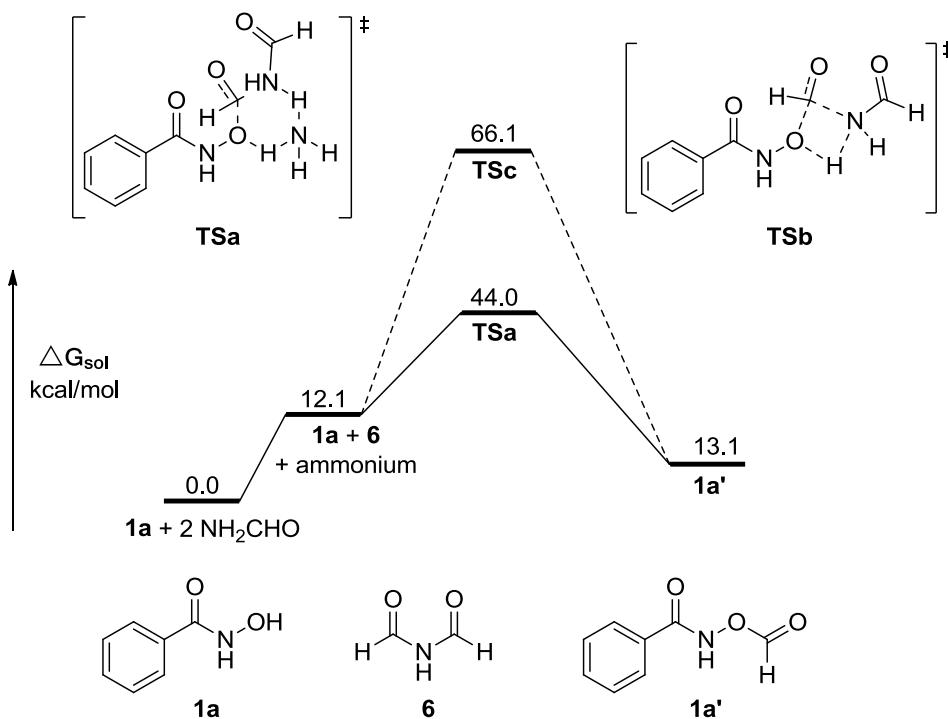

## 2. Calculated Cartesian Coordinates and Energies

|           |             |             |             |
|-----------|-------------|-------------|-------------|
| <b>1a</b> |             |             |             |
| C         | -3.62323900 | 0.08607300  | 0.18973800  |
| C         | -2.25664100 | -0.02132100 | -0.03454500 |
| C         | -1.47054000 | 1.13093100  | -0.11532100 |
| C         | -2.06526100 | 2.38764000  | 0.00661000  |
| C         | -3.43046000 | 2.49084400  | 0.23343900  |
| C         | -4.20939600 | 1.34072900  | 0.32901300  |
| H         | -4.23548400 | -0.81209700 | 0.24261300  |
| H         | -1.80596300 | -1.00183300 | -0.18425100 |
| H         | -1.43486000 | 3.27027500  | -0.07917400 |
| H         | -3.89093000 | 3.47179000  | 0.33472400  |
| H         | -5.28079700 | 1.42307600  | 0.50323200  |
| C         | -0.00741400 | 1.08316000  | -0.33627200 |
| O         | 0.65722800  | 2.01433100  | -0.77819300 |
| N         | 0.60849400  | -0.10845600 | -0.03807800 |
| H         | 0.30786500  | -0.61811900 | 0.78631400  |
| O         | 1.99443000  | -0.07115900 | -0.09132500 |
| H         | 2.15391600  | 0.85377300  | -0.38943100 |

Energies:

Sum of electronic and zero-point Energies = -475.671662

Sum of electronic and thermal Enthalpies = -475.662288

Sum of electronic and thermal Free Energies = -475.705213

Electronic energies = -475.8037364

Single point energies in solution = -475.811981800

### NH<sub>2</sub>CHO

|   |             |            |             |
|---|-------------|------------|-------------|
| N | -1.77501100 | 0.96517300 | -0.21099500 |
| H | -1.19945900 | 0.82986100 | -1.02826700 |
| H | -2.76624900 | 0.77269600 | -0.26928000 |
| C | -1.25883600 | 1.38859800 | 0.97253000  |
| H | -0.16210900 | 1.56111700 | 0.90533900  |
| O | -1.89805800 | 1.56283400 | 1.98475800  |

Energies:

Sum of electronic and zero-point Energies = -169.748427

Sum of electronic and thermal Enthalpies = -169.743454

Sum of electronic and thermal Free Energies = -169.773760

Electronic energies = -169.7936007

Single point energies in solution = -169.802301036

### TS1

|   |             |             |             |
|---|-------------|-------------|-------------|
| C | -3.64848100 | 1.77098200  | 1.96145900  |
| C | -2.73832900 | 1.00044400  | 1.24709900  |
| C | -2.17555700 | 1.48828600  | 0.06458700  |
| C | -2.56488800 | 2.74382800  | -0.40568600 |
| C | -3.47130000 | 3.51352300  | 0.30922200  |
| C | -4.01202700 | 3.03114800  | 1.49814800  |
| H | -4.08598200 | 1.37812200  | 2.87780500  |
| H | -2.49795300 | -0.00368900 | 1.59622200  |
| H | -2.13921800 | 3.09506100  | -1.34321200 |

|   |             |             |             |
|---|-------------|-------------|-------------|
| H | -3.76172800 | 4.49458600  | -0.06300500 |
| H | -4.72624200 | 3.63264100  | 2.05801500  |
| C | -1.19080600 | 0.72846500  | -0.75745700 |
| O | -1.11724500 | 0.90623000  | -1.98795400 |
| N | -0.41577800 | -0.12688600 | -0.06916000 |
| H | -0.43733000 | -0.11657600 | 0.94561900  |
| O | 0.52080900  | -0.92810300 | -0.59800100 |
| H | 0.62246200  | -0.88206300 | -2.12658600 |
| N | 1.14658500  | -0.17822100 | -2.78413200 |
| H | 1.57777100  | -0.53064700 | -3.63993200 |
| H | 0.38295500  | 0.52148300  | -2.91417900 |
| C | 2.08617200  | 0.35193800  | -1.74236200 |
| H | 2.81722500  | -0.41384800 | -1.44444000 |
| O | 2.06308100  | 1.49925100  | -1.41843700 |

Energies:

Sum of electronic and zero-point Energies = -645.379103

Sum of electronic and thermal Enthalpies = -645.366356

Sum of electronic and thermal Free Energies = -645.417496

Electronic energies = -645.5569559

Single point energies in solution = -645.578309467

### 1a'

|   |             |             |             |
|---|-------------|-------------|-------------|
| C | -1.53272400 | 2.30923600  | 1.46377600  |
| C | -1.07941000 | 1.01413900  | 1.24550800  |
| C | -0.94677600 | 0.53422800  | -0.05992400 |
| C | -1.28461100 | 1.35624300  | -1.13685800 |
| C | -1.72116400 | 2.65461300  | -0.91592100 |
| C | -1.84463100 | 3.13229900  | 0.38589800  |
| H | -1.64617500 | 2.67796300  | 2.48163000  |
| H | -0.84342800 | 0.36956600  | 2.08895000  |
| H | -1.19866800 | 0.95058900  | -2.14285500 |
| H | -1.97317900 | 3.29401100  | -1.75986100 |
| H | -2.19337100 | 4.14872600  | 0.56149900  |
| C | -0.52858900 | -0.85526400 | -0.38496700 |
| O | -0.91008400 | -1.43170300 | -1.39141100 |
| N | 0.24935900  | -1.56036800 | 0.52721000  |
| H | 0.74622000  | -2.36155700 | 0.08119800  |
| O | 1.14253800  | -0.82083300 | 1.33227800  |
| H | 1.64217700  | -4.32895900 | -1.50036100 |
| N | 1.46347900  | -3.34270500 | -1.33111900 |
| H | 2.25195200  | -2.81426800 | -1.69786500 |
| H | 0.64972600  | -3.06930900 | -1.88387200 |
| C | 2.17237000  | -0.26792100 | 0.64908200  |
| H | 2.80564400  | 0.25473100  | 1.38566500  |
| O | 2.36063400  | -0.33362400 | -0.53039900 |

Energies:

Sum of electronic and zero-point Energies = -645.431763

Sum of electronic and thermal Enthalpies = -645.417723

Sum of electronic and thermal Free Energies = -645.471854

Electronic energies = -645.6120075

Single point energies in solution = -645.615191152

### TS2

|   |             |             |             |
|---|-------------|-------------|-------------|
| C | -4.02560700 | 2.05296300  | 1.77216900  |
| C | -3.08408000 | 1.16799100  | 1.26186900  |
| C | -2.11958900 | 1.61934900  | 0.35667900  |
| C | -2.11978100 | 2.95732400  | -0.04063700 |
| C | -3.06413300 | 3.83926100  | 0.46750900  |
| C | -4.01631400 | 3.38823900  | 1.37771000  |
| H | -4.77681400 | 1.69741500  | 2.47567700  |
| H | -3.08890300 | 0.11954800  | 1.55121900  |
| H | -1.36912900 | 3.27994900  | -0.75963800 |
| H | -3.06108900 | 4.88140400  | 0.15216700  |
| H | -4.75820600 | 4.07879700  | 1.77622300  |
| C | -1.06541200 | 0.72217000  | -0.20878500 |
| O | -0.30153100 | 1.10937300  | -1.10218000 |
| N | -0.97247000 | -0.47217500 | 0.46330400  |
| H | 0.20798000  | 0.03021000  | 1.28602000  |
| O | 0.01902300  | -1.29918300 | -0.20409900 |
| H | 1.38147400  | 0.75911900  | 0.33058300  |
| N | 1.31154000  | 0.37829400  | 1.28760800  |
| H | 1.91248800  | -0.44126300 | 1.36412100  |
| H | 1.54624200  | 1.08121800  | 1.98553500  |
| C | -0.37174600 | -1.79082700 | -1.39369800 |
| H | -1.41416400 | -1.51177200 | -1.63959900 |
| O | 0.35019800  | -2.47557300 | -2.05990300 |

Energies:

Sum of electronic and zero-point Energies = -645.396693

Sum of electronic and thermal Enthalpies = -645.383397

Sum of electronic and thermal Free Energies = -645.436147

Electronic energies = -645.5733252

Single point energies in solution = -645.5733252

### 1a''

|   |             |             |             |
|---|-------------|-------------|-------------|
| C | -1.88657900 | 0.92898600  | 3.67081000  |
| C | -1.47939000 | 0.17799300  | 2.57400300  |
| C | -0.98138200 | 0.80414800  | 1.42727400  |
| C | -0.90456100 | 2.19624400  | 1.40865000  |
| C | -1.31030700 | 2.95096100  | 2.50404200  |
| C | -1.80398400 | 2.32003200  | 3.64236700  |
| H | -2.27323300 | 0.42567700  | 4.55847300  |
| H | -1.53952700 | -0.90818100 | 2.58516600  |
| H | -0.51377800 | 2.64894000  | 0.49817200  |
| H | -1.24183700 | 4.03951200  | 2.47094000  |
| H | -2.12281900 | 2.90771800  | 4.50430900  |
| C | -0.51203600 | 0.06552100  | 0.18312500  |
| O | -0.11502800 | 0.72860500  | -0.78984200 |
| N | -0.61568800 | -1.24838500 | 0.37384800  |
| O | -0.16492700 | -1.91072500 | -0.83665600 |

|   |             |             |             |
|---|-------------|-------------|-------------|
| C | -0.12753500 | -3.21472300 | -0.66225800 |
| H | -0.42773100 | -3.50068800 | 0.36846900  |
| O | 0.19529900  | -4.00389300 | -1.52304400 |

Energies:

Sum of electronic and zero-point Energies = -588.408914

Sum of electronic and thermal Enthalpies = -588.397765

Sum of electronic and thermal Free Energies = -588.446255

Electronic energies = -588.5365148

Single point energies in solution = -588.616630238

### NH<sub>4</sub><sup>+</sup>

|   |            |             |             |
|---|------------|-------------|-------------|
| N | 1.81196400 | -0.80454300 | 0.00000000  |
| H | 2.15482100 | -1.77458600 | -0.00000100 |
| H | 2.15491400 | -0.31944200 | 0.84007300  |
| H | 2.15491400 | -0.31944300 | -0.84007200 |
| H | 0.78353700 | -0.80454300 | 0.00000000  |

Energies:

Sum of electronic and zero-point Energies = -56.802092

Sum of electronic and thermal Enthalpies = -56.798296

Sum of electronic and thermal Free Energies = -56.821754

Electronic energies = -56.8516768

Single point energies in solution = -56.9835233624

### TS3

|   |             |             |             |
|---|-------------|-------------|-------------|
| C | -2.19706100 | 1.07347900  | 3.60509800  |
| C | -2.10658800 | 0.26817700  | 2.47668500  |
| C | -1.30111700 | 0.65595100  | 1.40553400  |
| C | -0.57568900 | 1.84571200  | 1.47685300  |
| C | -0.66854700 | 2.64926900  | 2.60644500  |
| C | -1.47956600 | 2.26643200  | 3.67333000  |
| H | -2.82554400 | 0.76835700  | 4.44208100  |
| H | -2.65098300 | -0.67320800 | 2.41113600  |
| H | 0.06038100  | 2.12458200  | 0.63743900  |
| H | -0.10086500 | 3.57854800  | 2.65989800  |
| H | -1.54642100 | 2.89467600  | 4.56119100  |
| C | -1.57574400 | -0.02888600 | -0.10028000 |
| O | -2.42722900 | 0.32082200  | -0.87871700 |
| N | -0.60647100 | -0.69860500 | 0.35596100  |
| O | -0.19384500 | -2.04797000 | -1.11688600 |
| C | 0.56032000  | -2.93611000 | -0.60141200 |
| H | 0.78945400  | -2.76699000 | 0.48908400  |
| O | 1.04357000  | -3.92219600 | -1.16029200 |

Energies:

Sum of electronic and zero-point Energies = -588.363391

Sum of electronic and thermal Enthalpies = -588.352112

Sum of electronic and thermal Free Energies = -588.401096

Electronic energies = -588.4862543

Single point energies in solution = -645.556547143

### 3a'

|   |             |             |            |
|---|-------------|-------------|------------|
| C | -0.59704700 | 2.53036800  | 2.59362400 |
| C | -1.47770000 | 1.59469900  | 2.06793800 |
| C | -0.98142600 | 0.52714000  | 1.31632900 |
| C | 0.38921500  | 0.40257900  | 1.09412000 |
| C | 1.25997100  | 1.34500400  | 1.62508800 |
| C | 0.77224000  | 2.41045800  | 2.37565100 |
| H | -0.98679900 | 3.36112300  | 3.17902800 |
| H | -2.55048700 | 1.68213900  | 2.23379300 |
| H | 0.75144500  | -0.43736900 | 0.50561800 |
| H | 2.32946500  | 1.24410500  | 1.45029300 |
| H | 1.45838000  | 3.14636700  | 2.78989400 |
| C | -2.98942100 | -0.74833800 | 0.69182600 |
| O | -4.07984600 | -1.15560200 | 0.54116500 |
| N | -1.82970700 | -0.43524000 | 0.77242800 |

Energies:

Sum of electronic and zero-point Energies = -399.360875

Sum of electronic and thermal Enthalpies = -399.352794

Sum of electronic and thermal Free Energies = -399.393390

Electronic energies = -399.4647583

Single point energies in solution = -399.460751906

#### HCO<sub>2</sub>NH<sub>4</sub>

|   |             |            |             |
|---|-------------|------------|-------------|
| N | -0.27855200 | 0.78347700 | -1.13915100 |
| H | -0.17776700 | 0.06213400 | -1.84862500 |
| H | 0.55111000  | 1.37838400 | -1.17618500 |
| H | -1.08351100 | 1.35097200 | -1.39193700 |
| H | 0.02890900  | 0.39340200 | 0.53550200  |
| O | 0.43716700  | 0.33695600 | 1.45881200  |
| C | 1.52693500  | 1.07834100 | 1.47030800  |
| H | 2.00513600  | 1.04198200 | 2.46641700  |
| O | 1.97406800  | 1.72085400 | 0.54597700  |

Energies:

Sum of electronic and zero-point Energies = -246.127417

Sum of electronic and thermal Enthalpies = -246.120417

Sum of electronic and thermal Free Energies = -246.156284

Electronic energies = -246.1997263

Single point energies in solution = -246.201232912

### 3. Copy of NMR Spectra

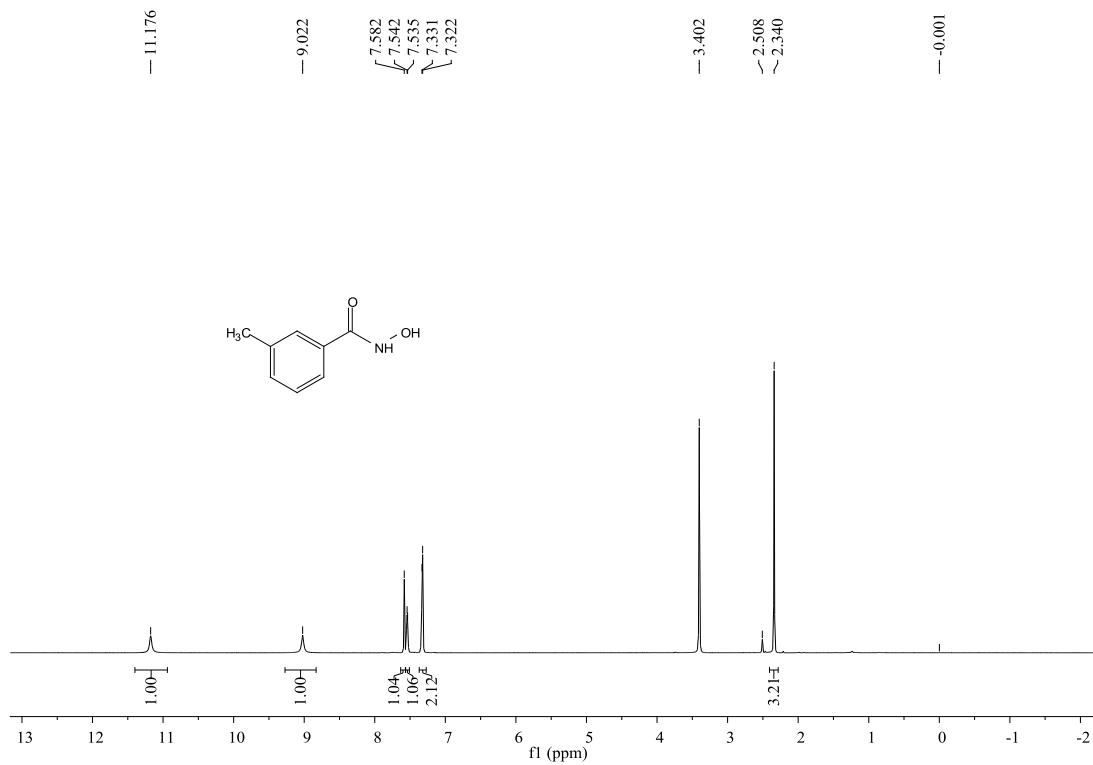

<sup>1</sup>H NMR: *N*-hydroxy-3-methylbenzamide (**1b**)

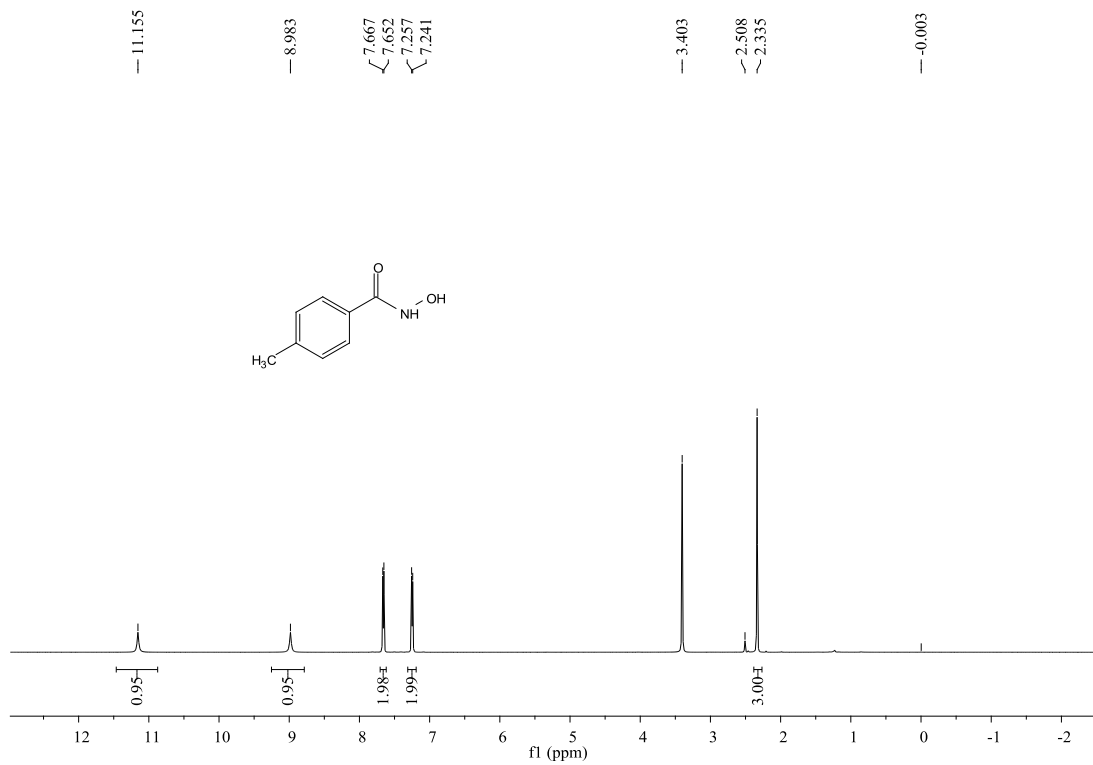

<sup>1</sup>H NMR: *N*-hydroxy-4-methylbenzamide (**1c**)

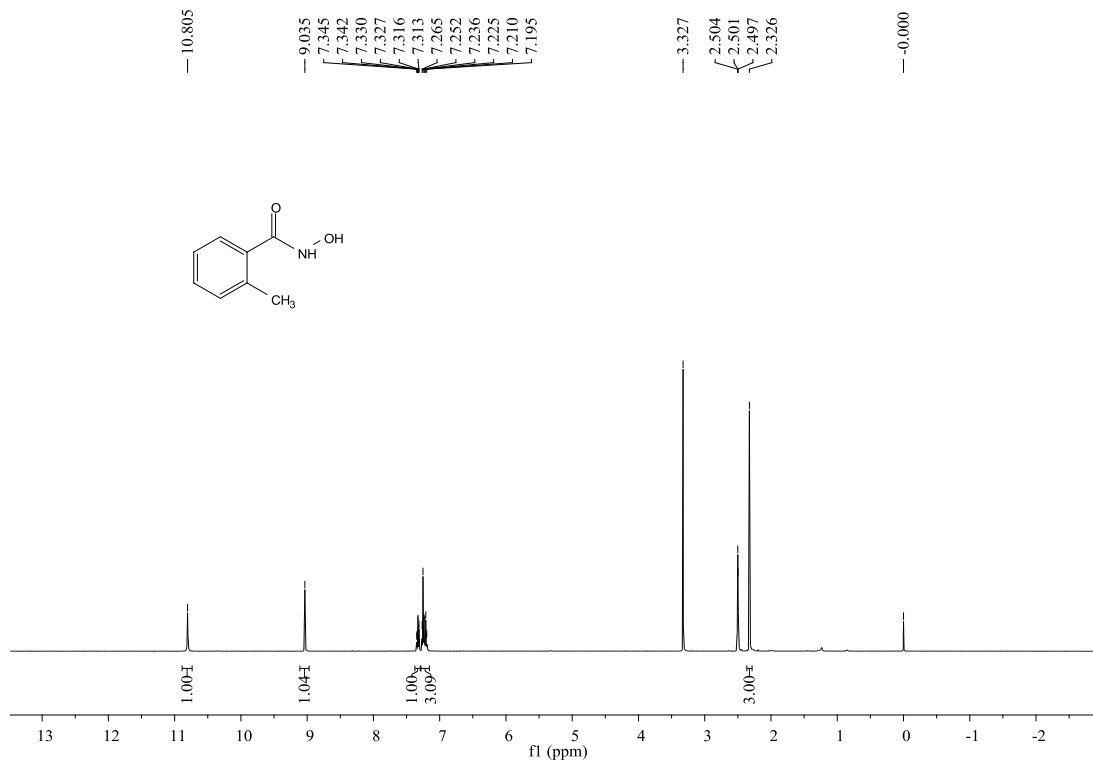

<sup>1</sup>H NMR: *N*-hydroxy-2-methylbenzamide (**1d**)

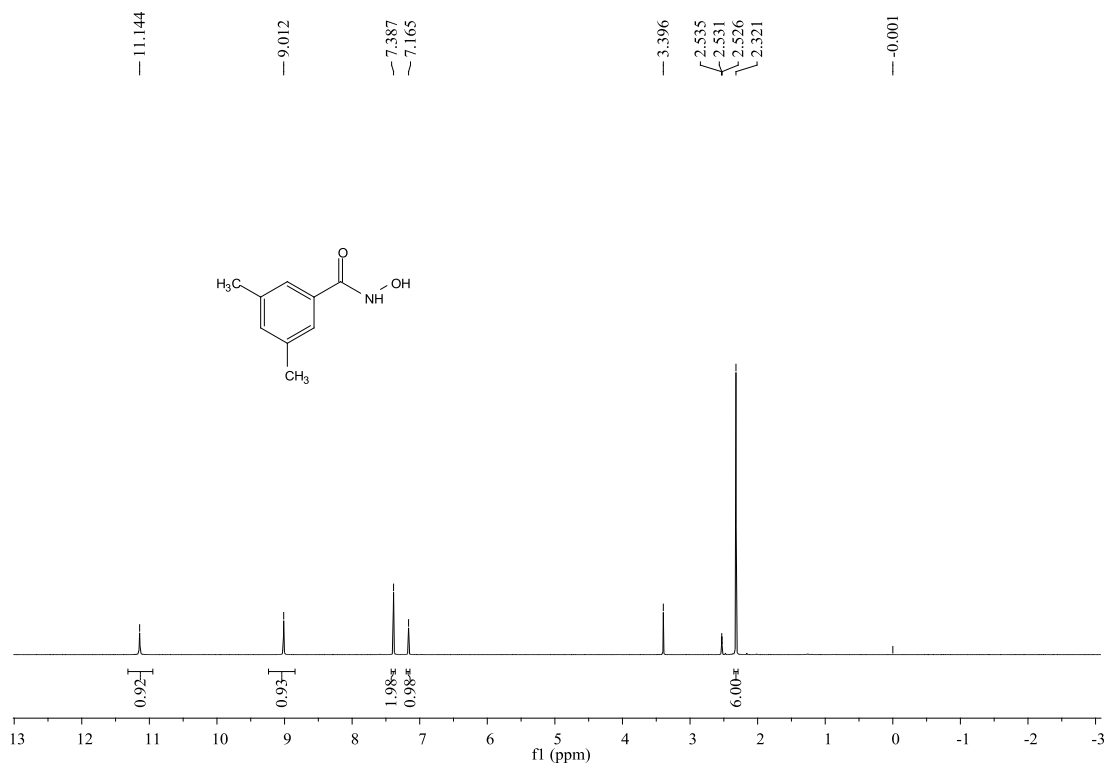

<sup>1</sup>H NMR: *N*-hydroxy-3,5-dimethylbenzamide (**1e**)

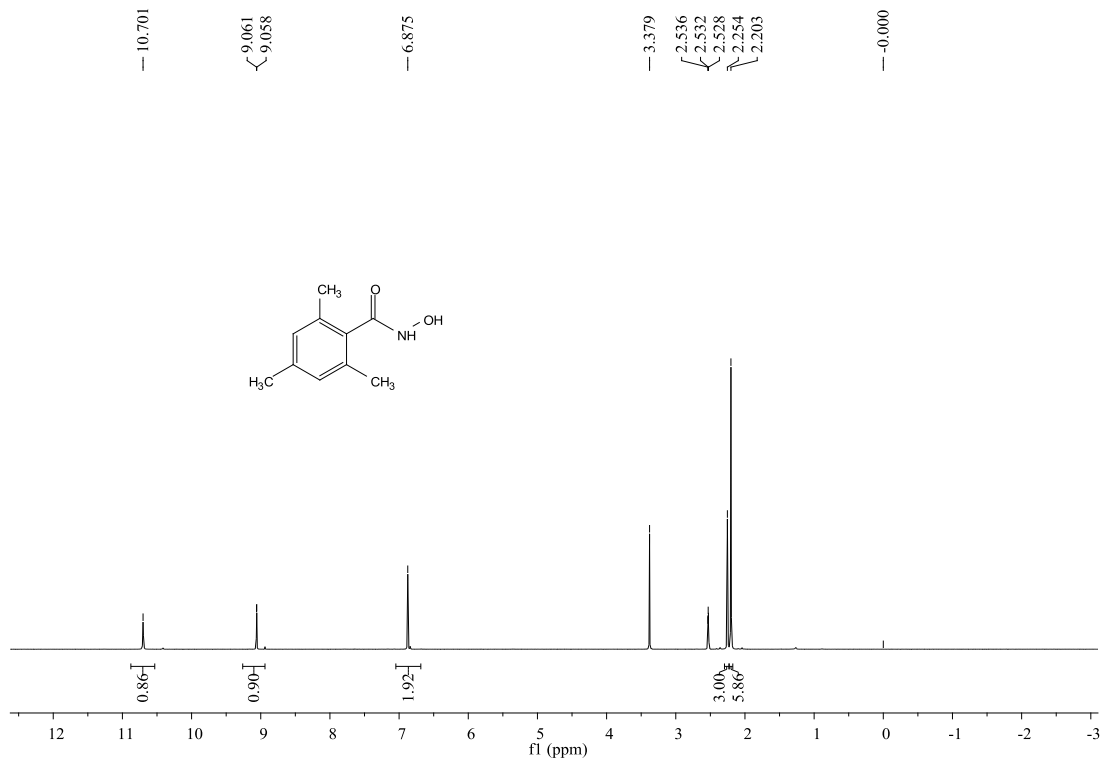

<sup>1</sup>H NMR: *N*-hydroxy-2,4,6-trimethylbenzamide (**1f**)

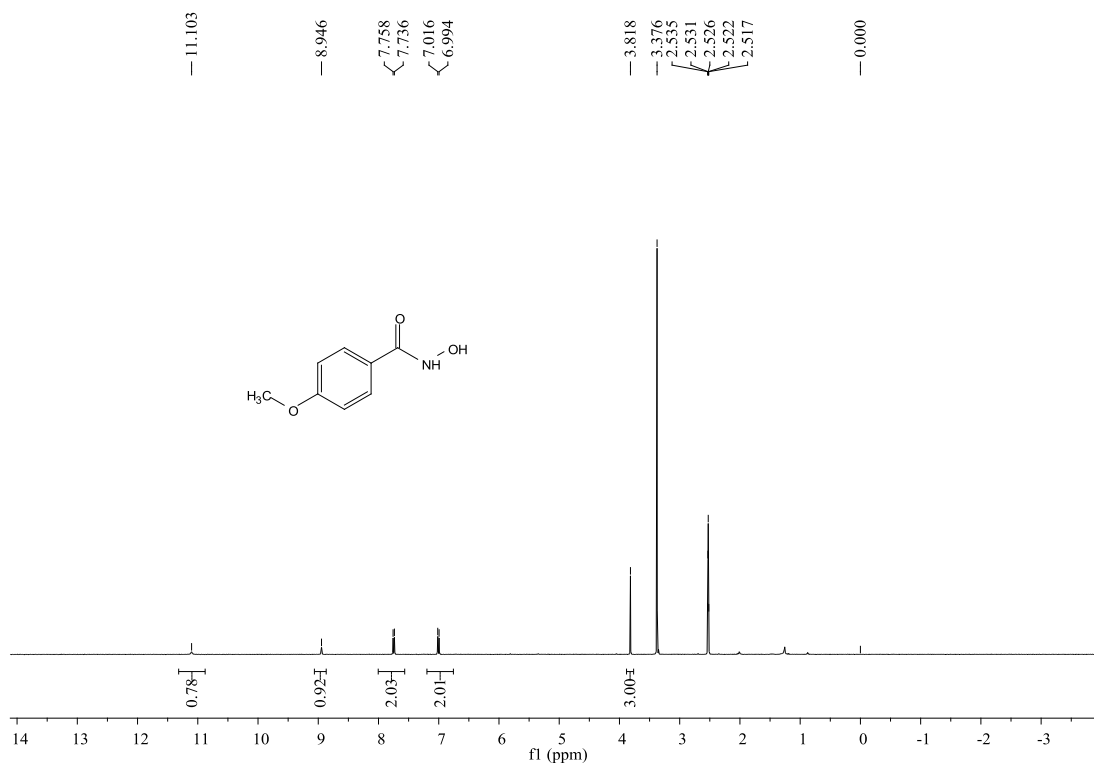

<sup>1</sup>H NMR: *N*-hydroxy-4-methoxybenzamide (**1g**)



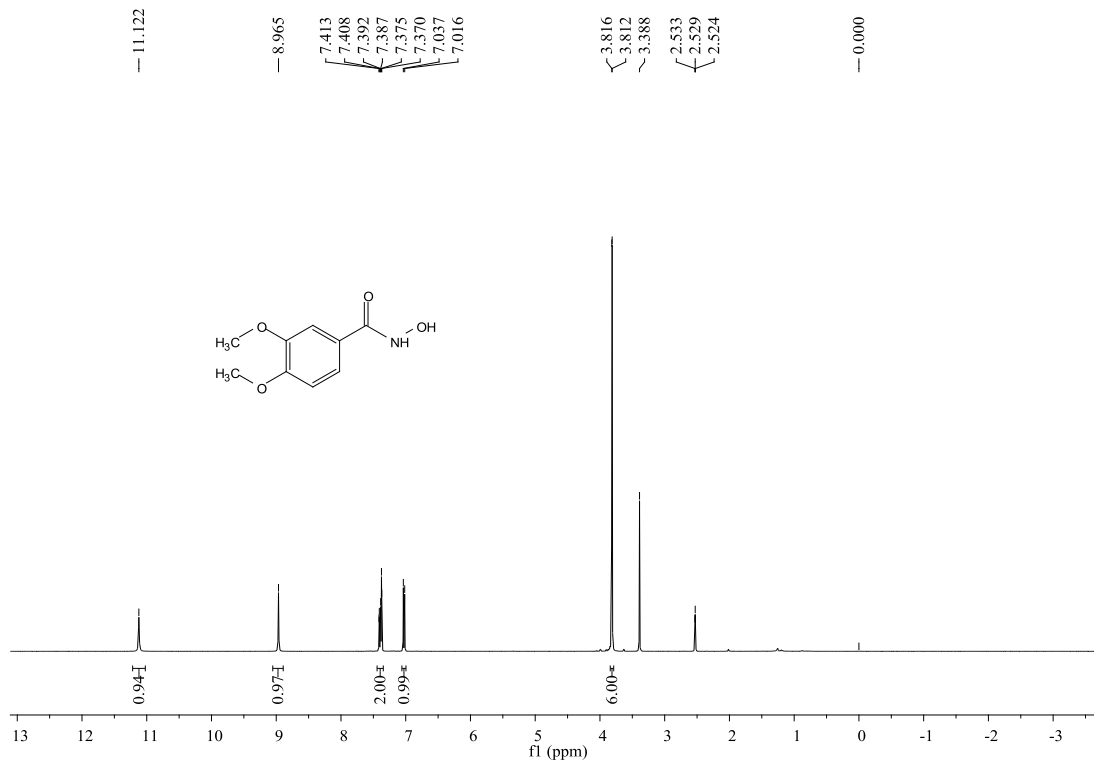

<sup>1</sup>H NMR: *N*-hydroxy-4, 5-dimethoxybenzamide (**1h**)

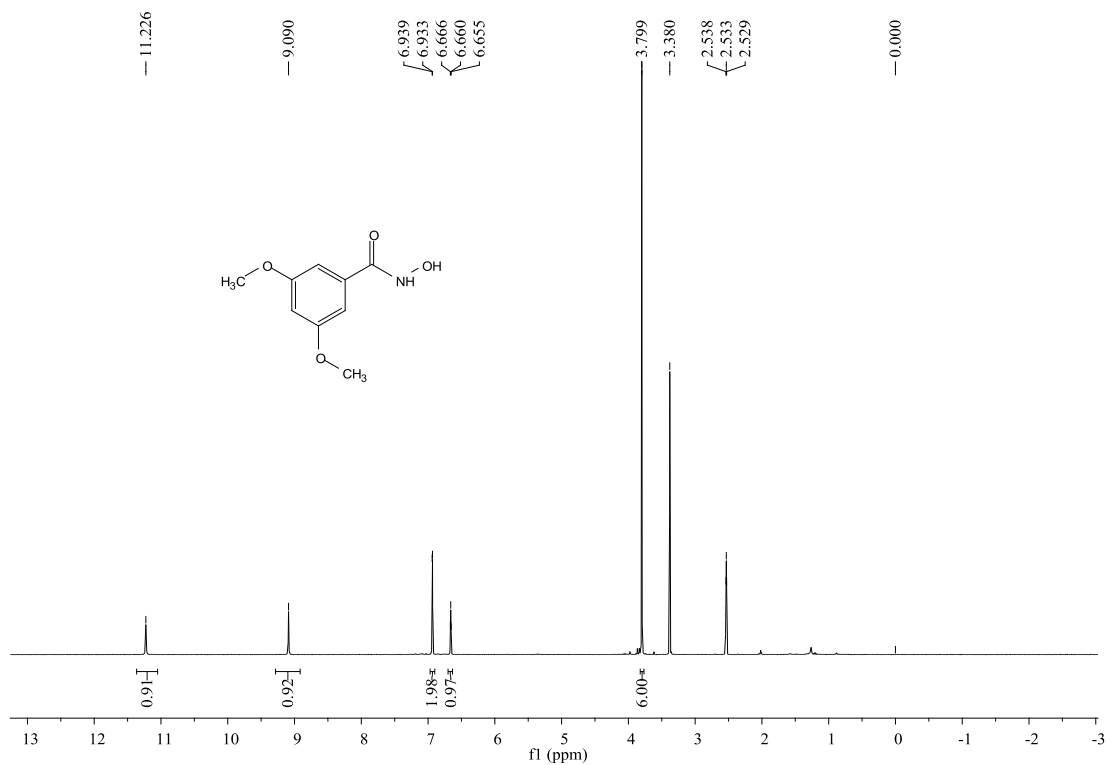

<sup>1</sup>H NMR: *N*-hydroxy-3, 5-dimethoxybenzamide (**1i**)

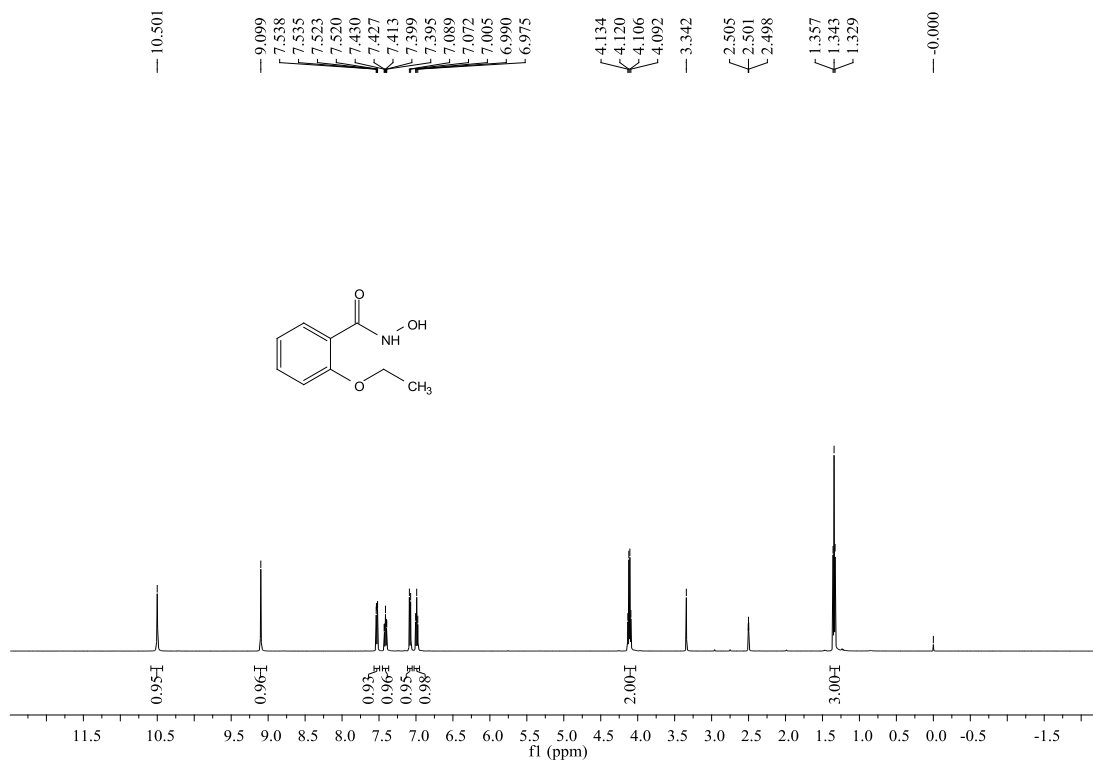

<sup>1</sup>H NMR: 2-ethoxy-*N*-hydroxybenzamide (**1j**)

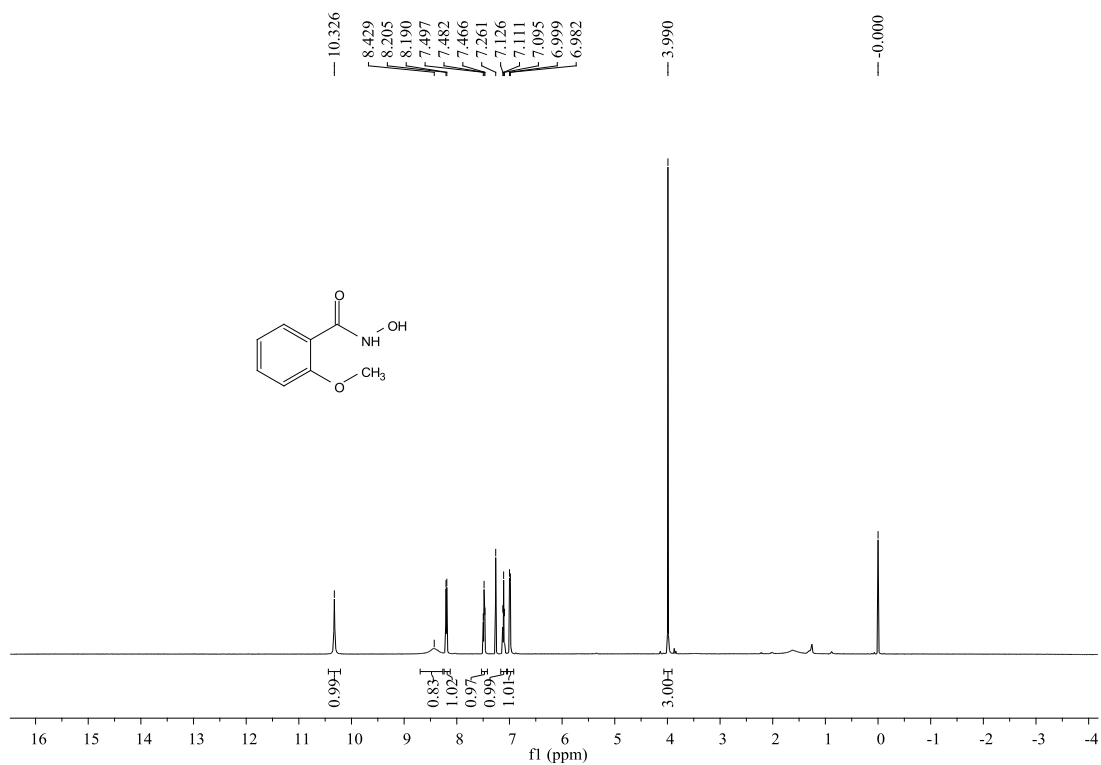

<sup>1</sup>H NMR: *N*-hydroxy-2-methoxybenzamide (**1k**)

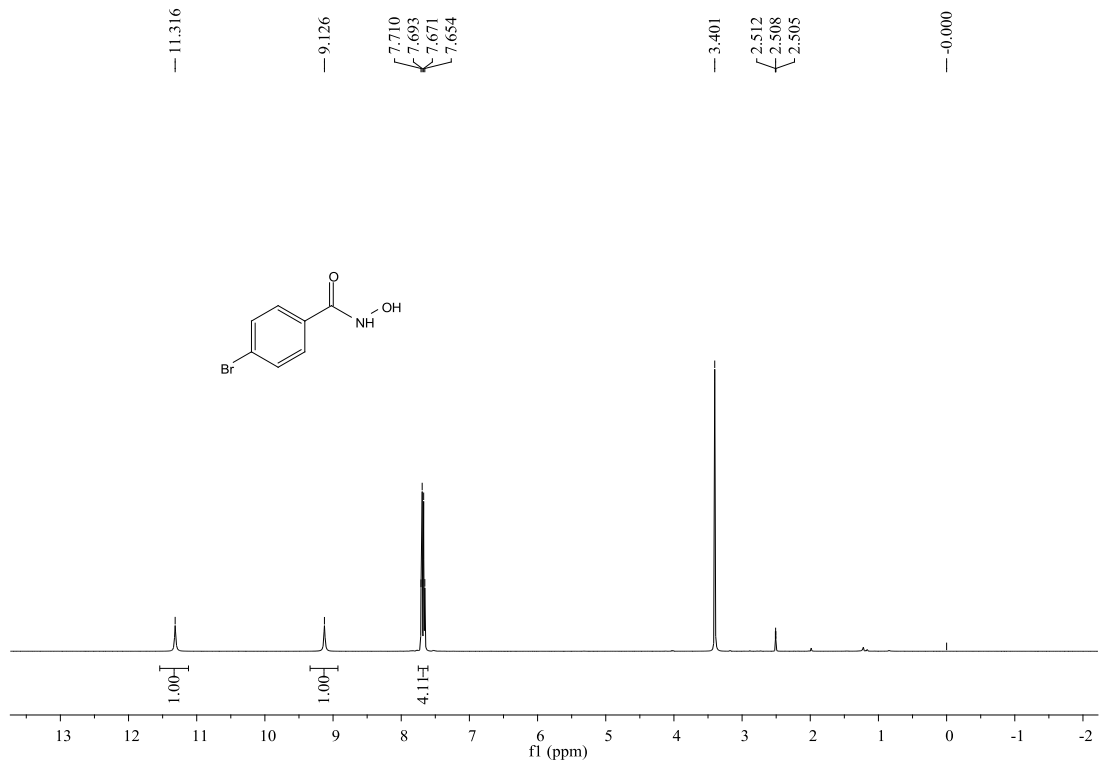

$^1\text{H NMR}$ : 4-bromo-*N*-hydroxybenzamide (**1m**)

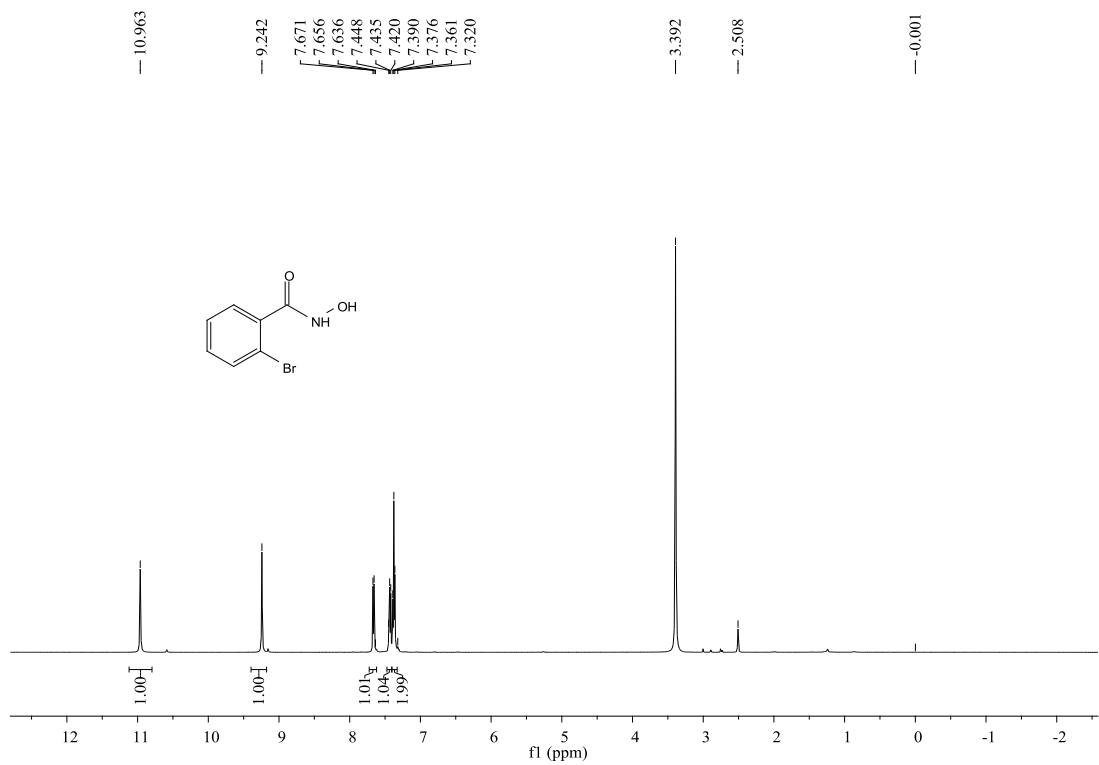

$^1\text{H NMR}$ : 2-bromo-*N*-hydroxybenzamide (**1n**)

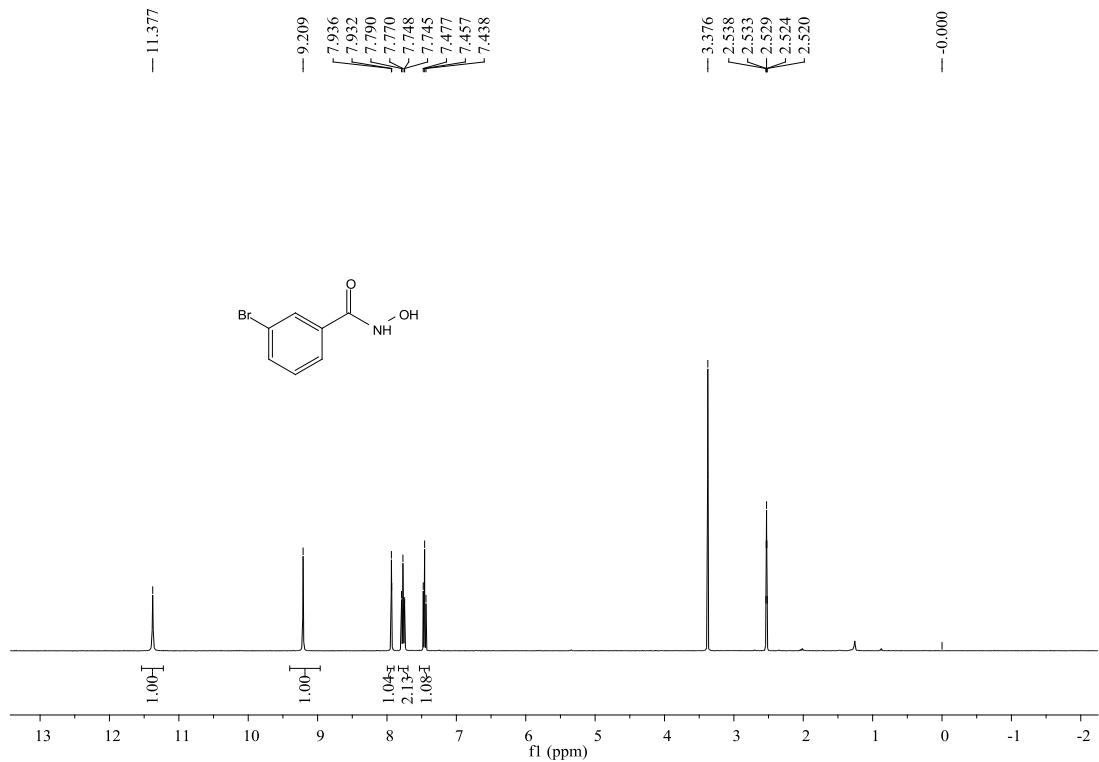

$^1\text{H NMR}$ : 3-bromo-*N*-hydroxybenzamide (**1o**)

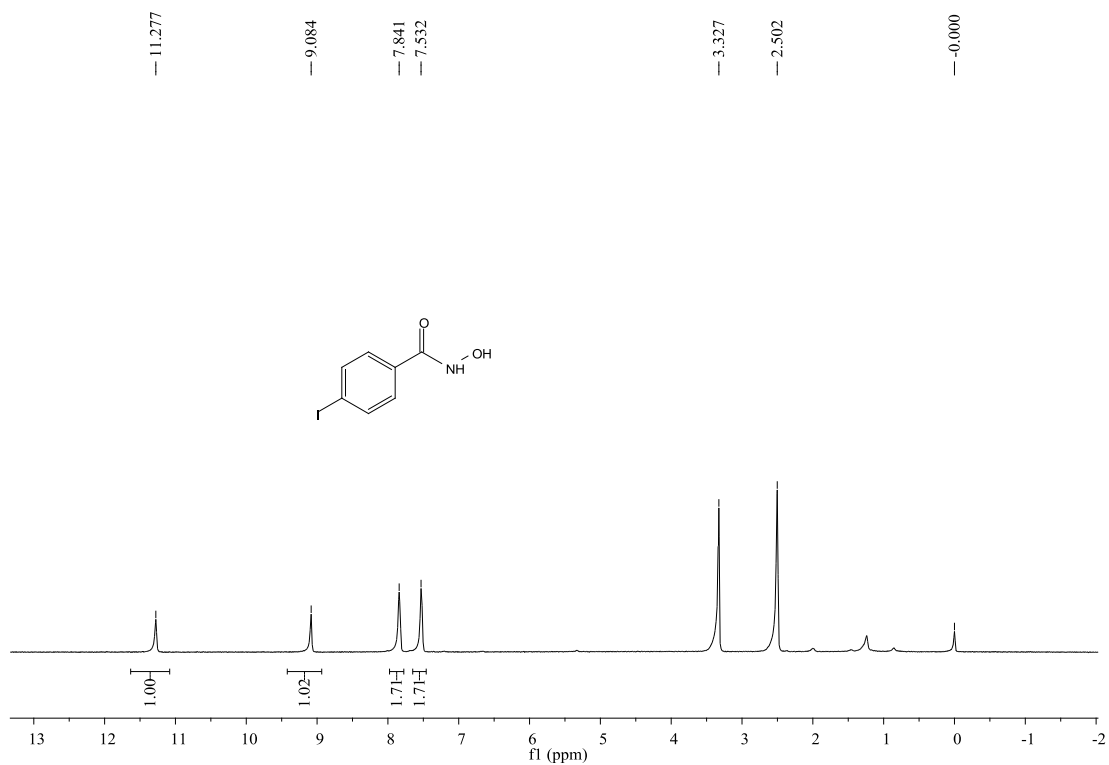

$^1\text{H NMR}$ : *N*-hydroxy-4-iodobenzamide (**1p**)

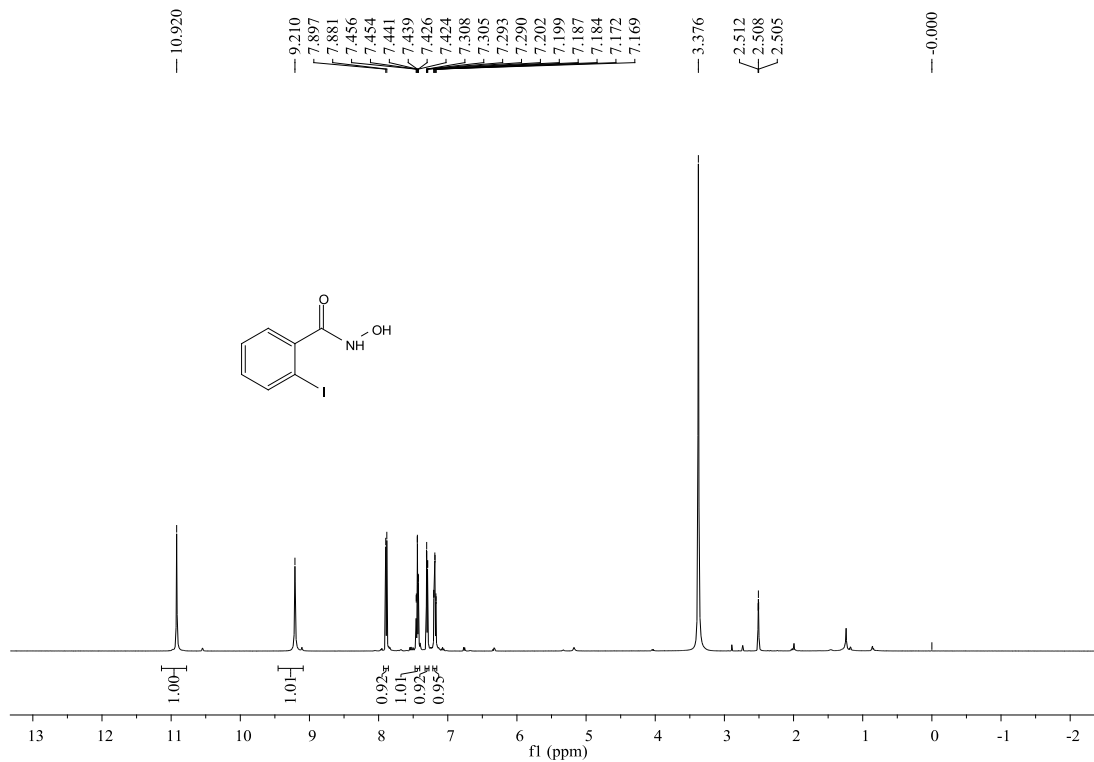

$^1\text{H NMR}$ : *N*-hydroxy-2-iodobenzamide (**1q**)

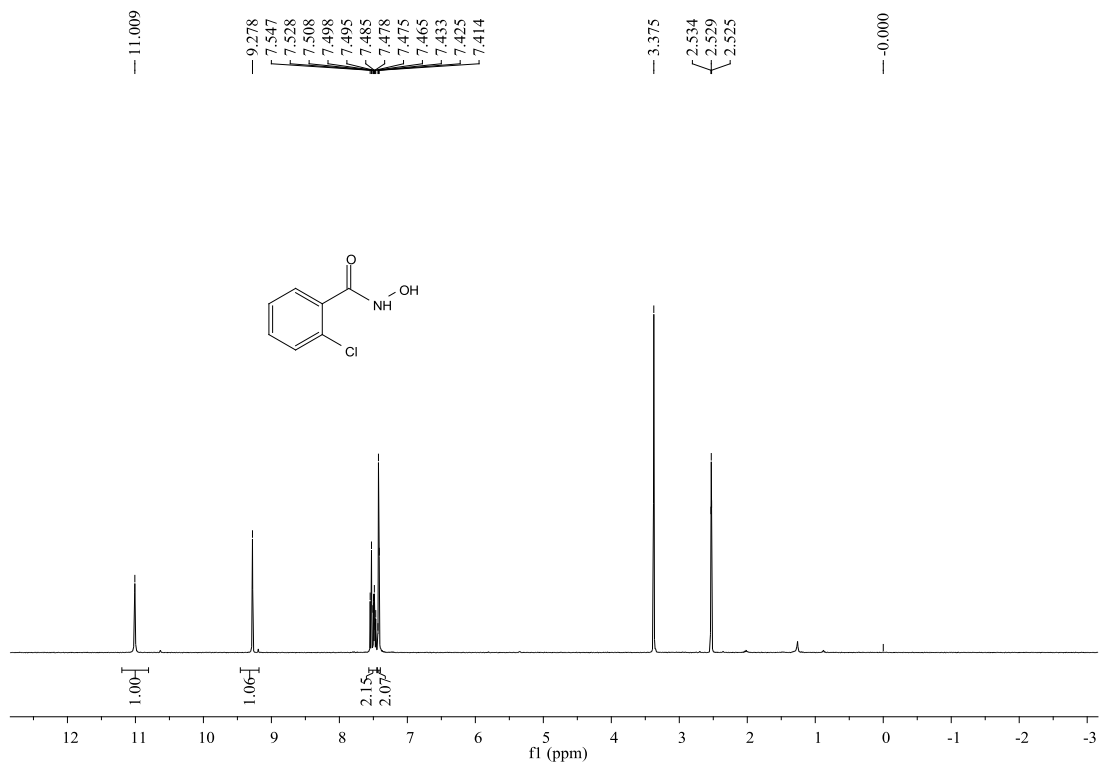

$^1\text{H NMR}$ : 3-chloro-*N*-hydroxybenzamide (**1r**)

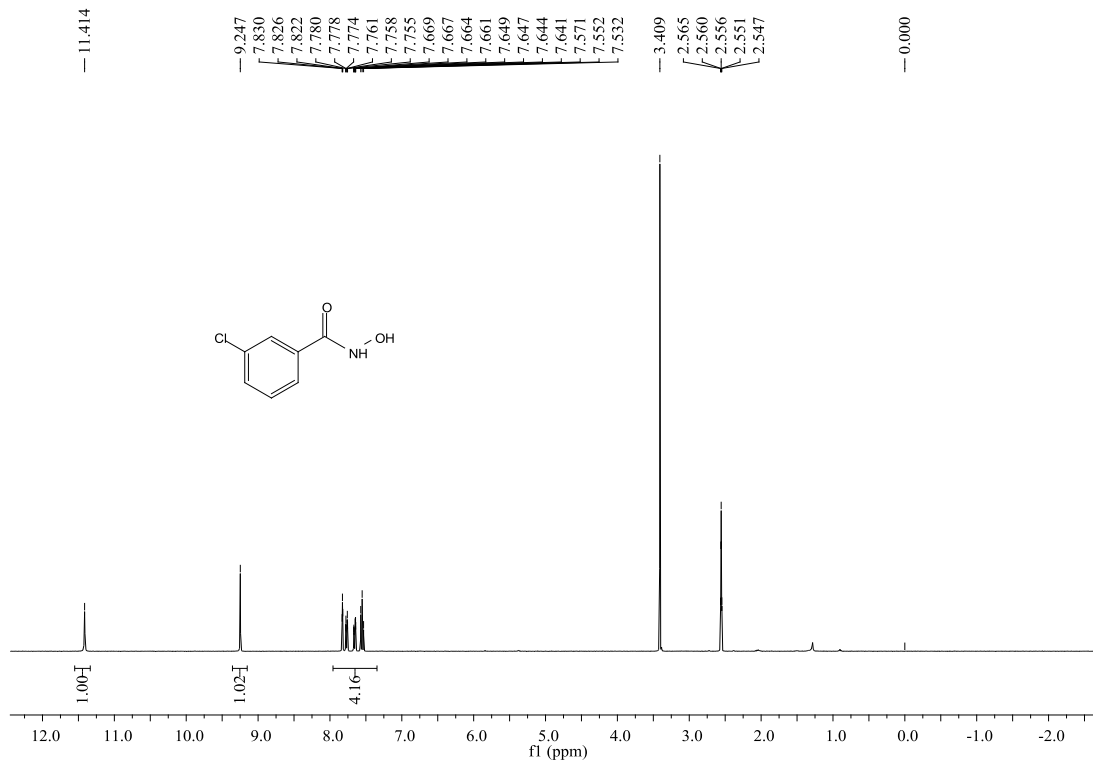

<sup>1</sup>H NMR: 3-chloro-*N*-hydroxybenzamide (1s)

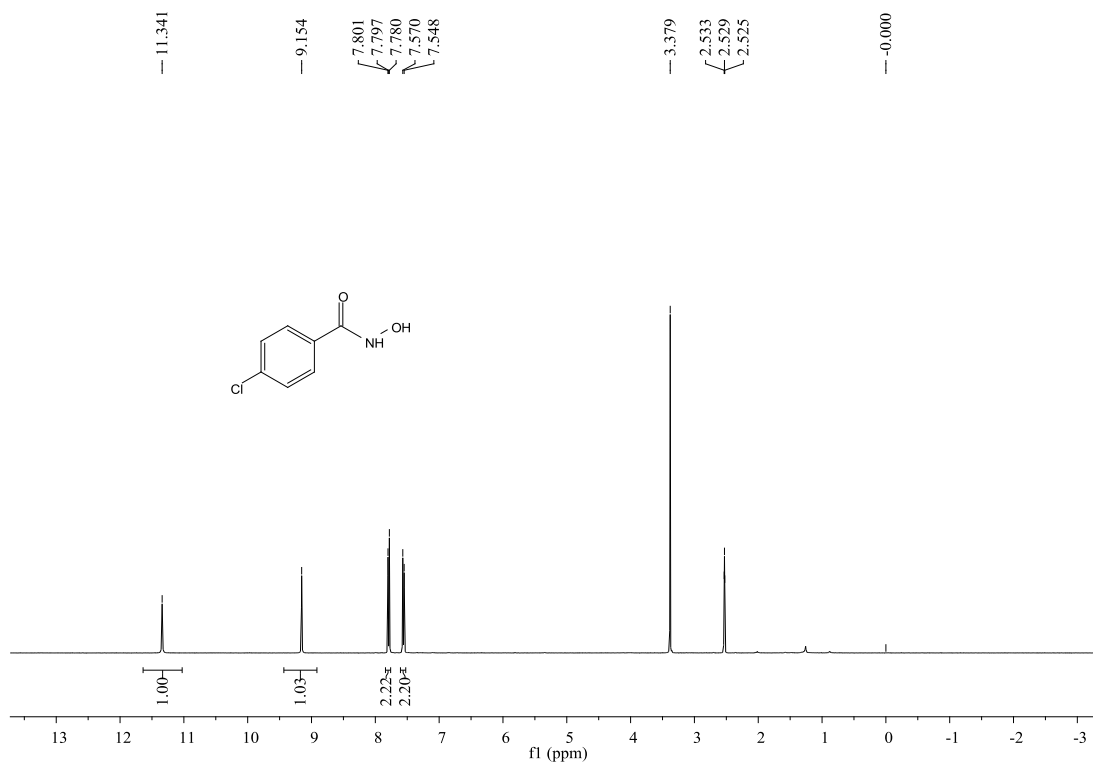

<sup>1</sup>H NMR: 4-chloro-*N*-hydroxybenzamide (1t)

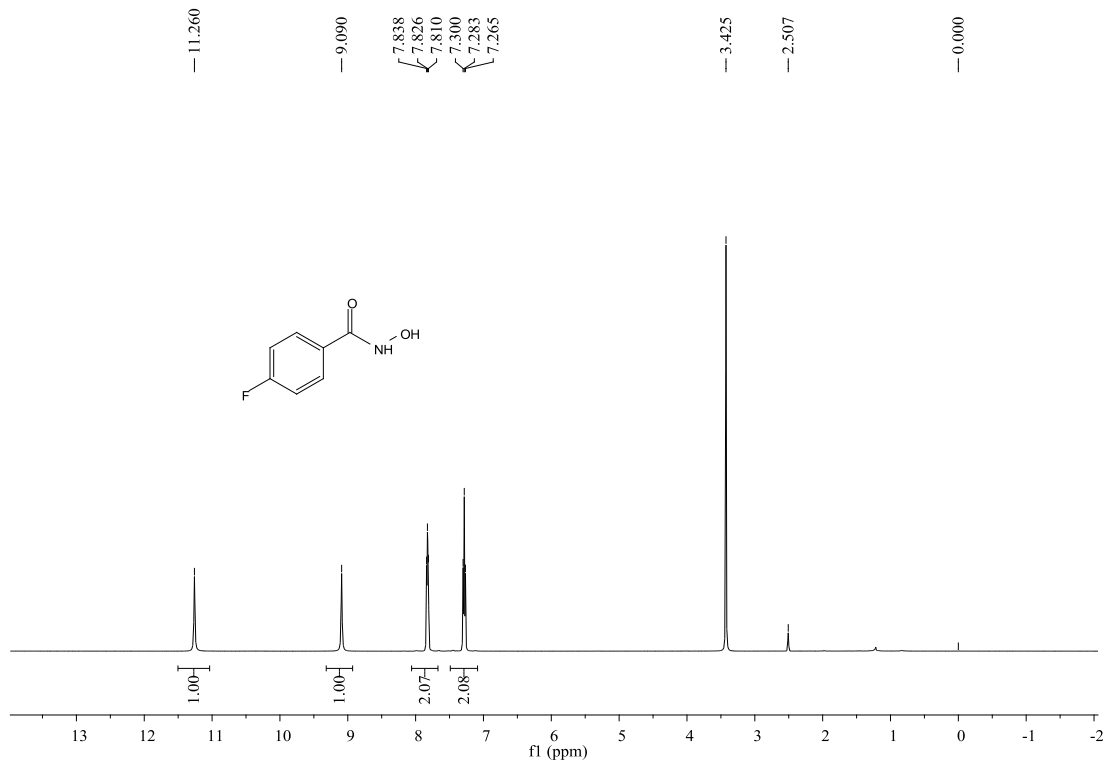

$^1\text{H NMR}$ : 4-fluoro-*N*-hydroxybenzamide (**1u**)

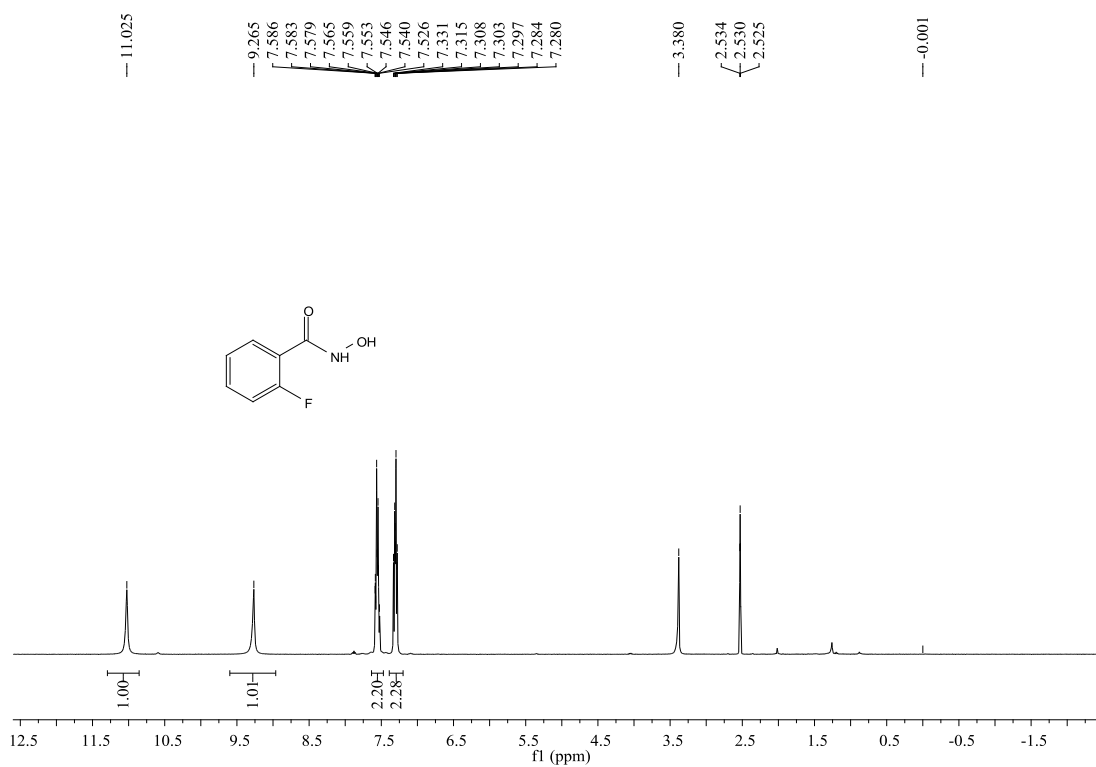

$^1\text{H NMR}$ : 2-fluoro-*N*-hydroxybenzamide (**1v**)

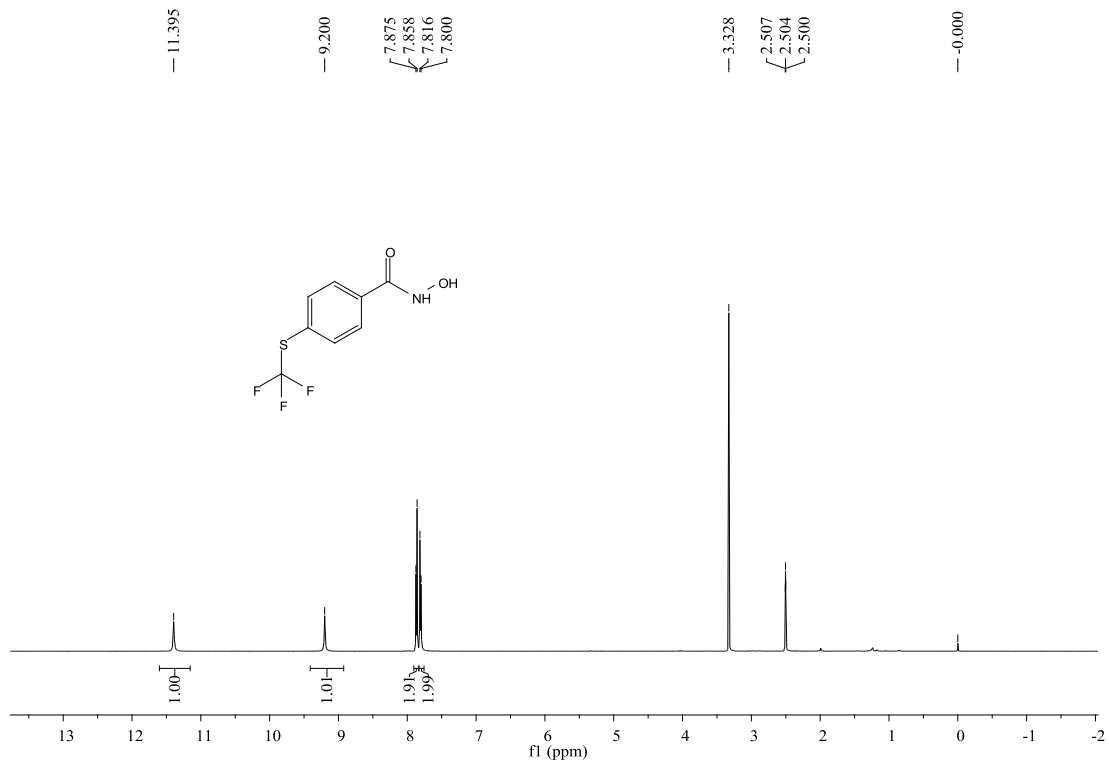

$^1\text{H NMR}$ : *N*-hydroxy-4-((trifluoromethyl)thio)benzamide (**1w**):

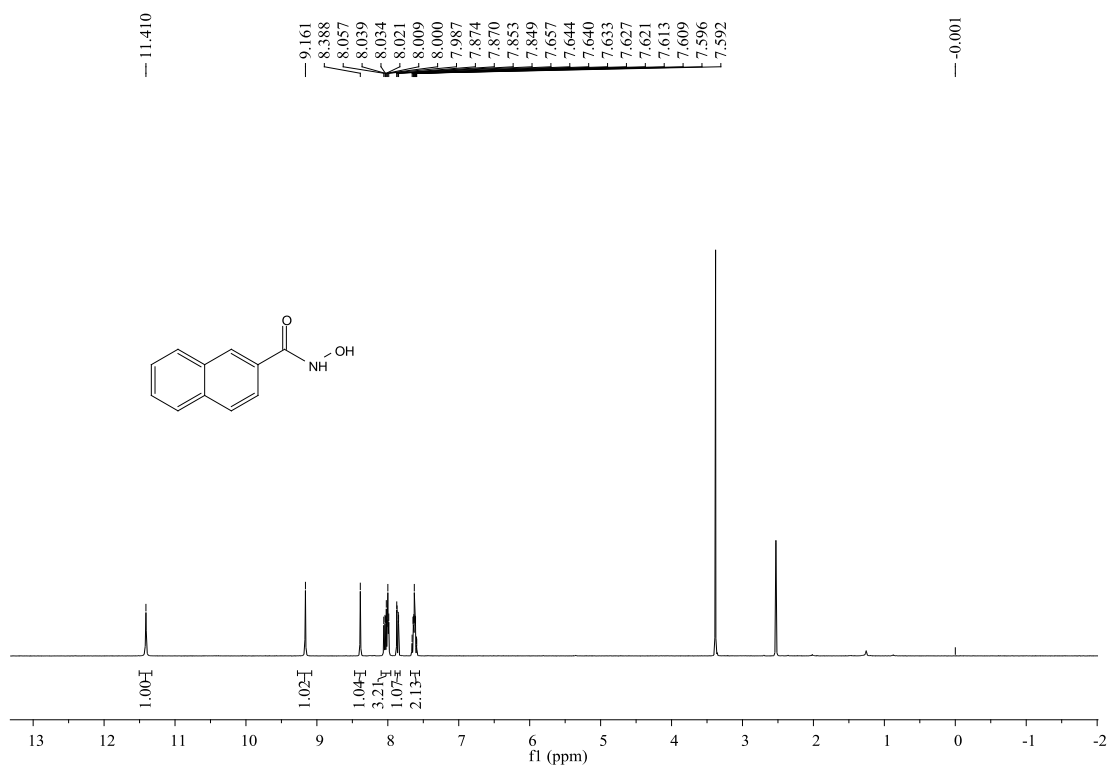

$^1\text{H NMR}$ : *N*-hydroxy-2-naphthamide (**1x**):



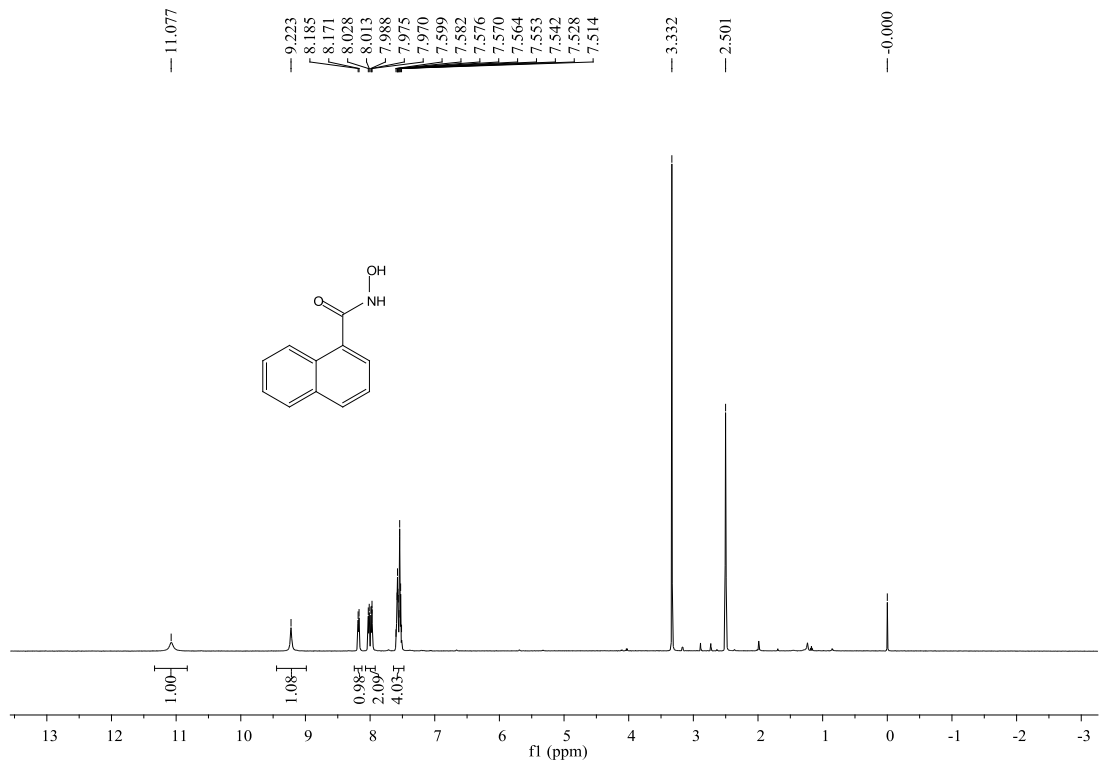

$^1\text{H NMR}$ : *N*-hydroxy-1-naphthamide (**1y**)

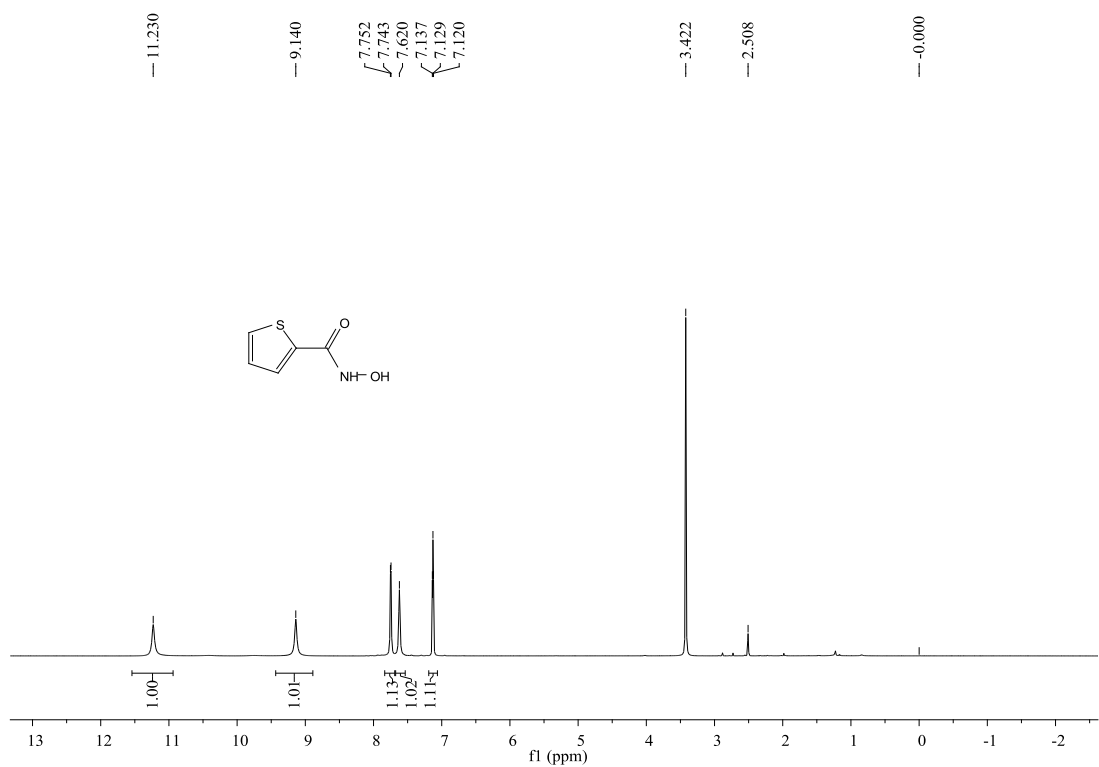

$^1\text{H NMR}$ : *N*-hydroxythiophene-2-carboxamide (**1z**)

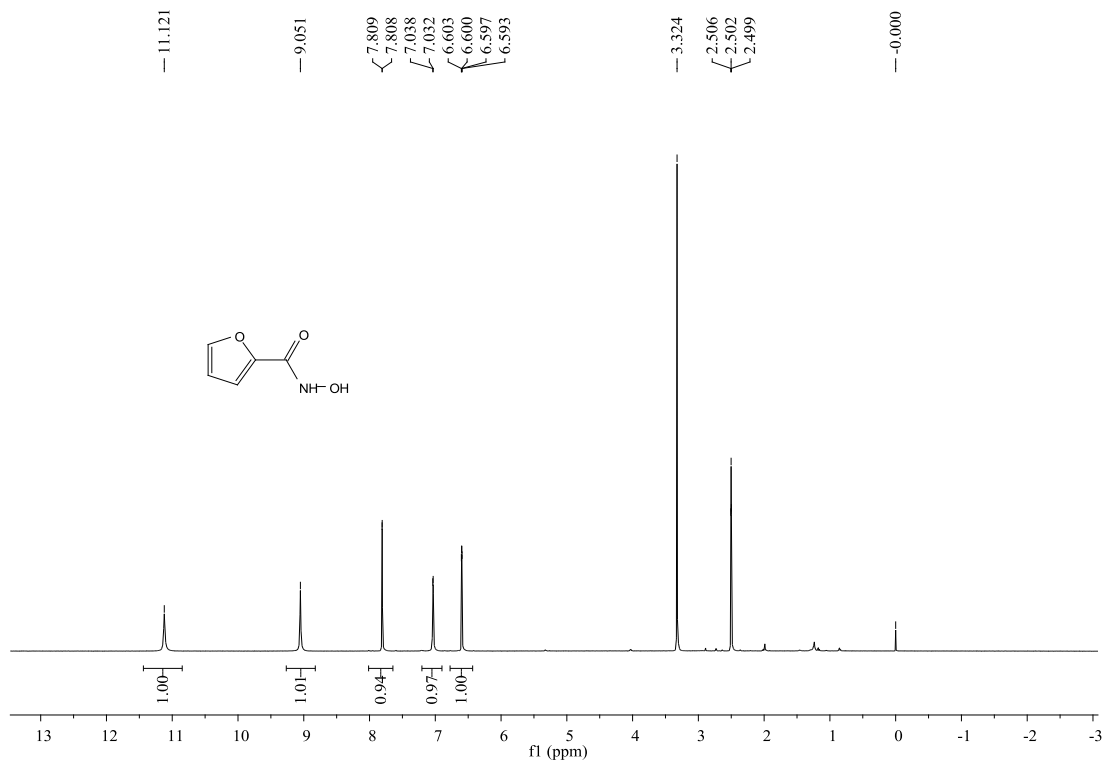

<sup>1</sup>H NMR: *N*-hydroxyfuran-2-carboxamide (**1a'**)

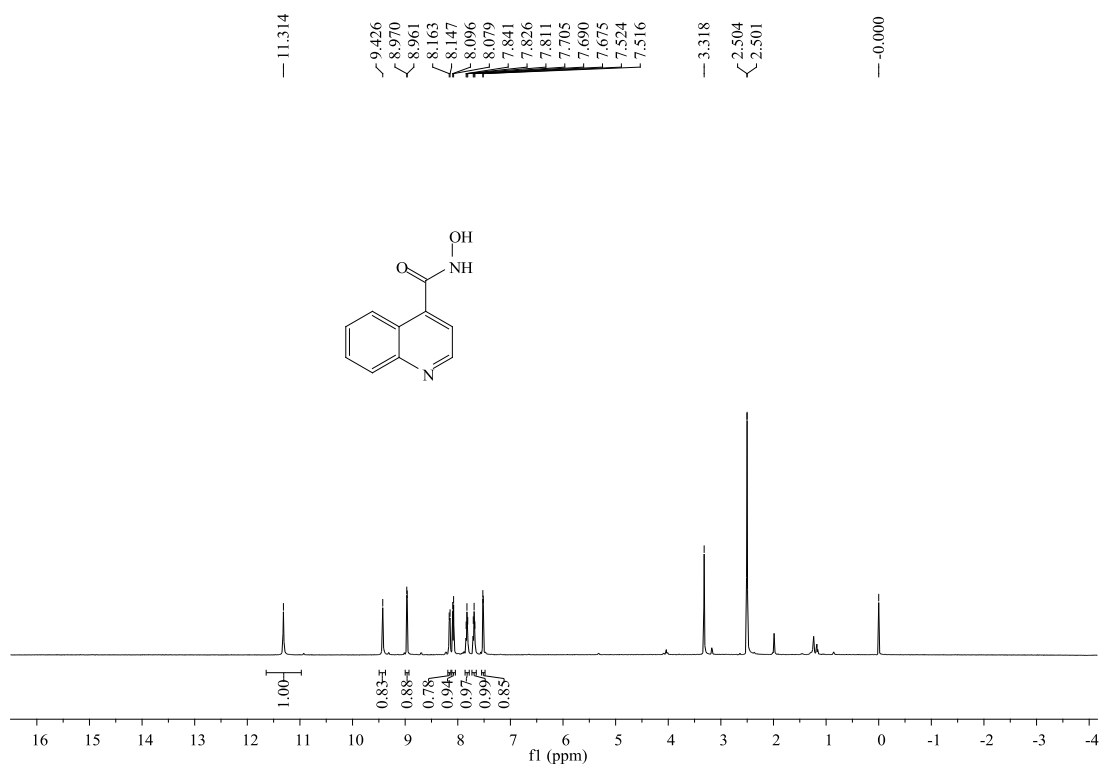

<sup>1</sup>H NMR: *N*-hydroxyquinoline-4-carboxamide (**1b'**)

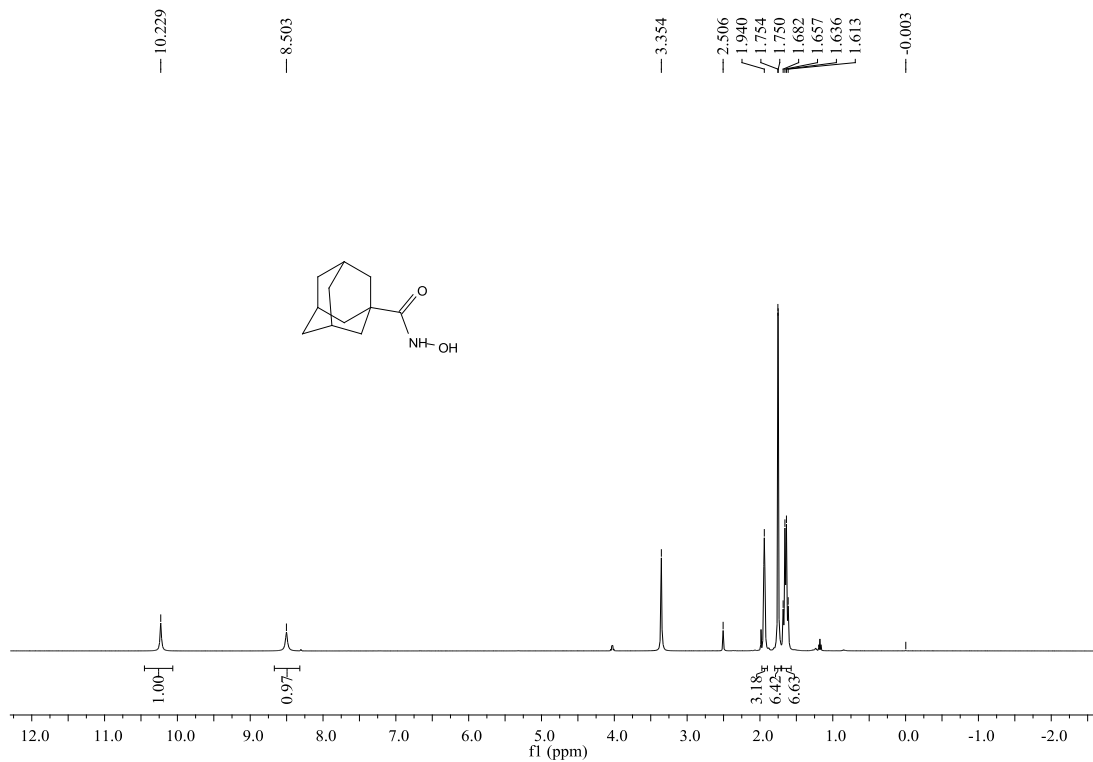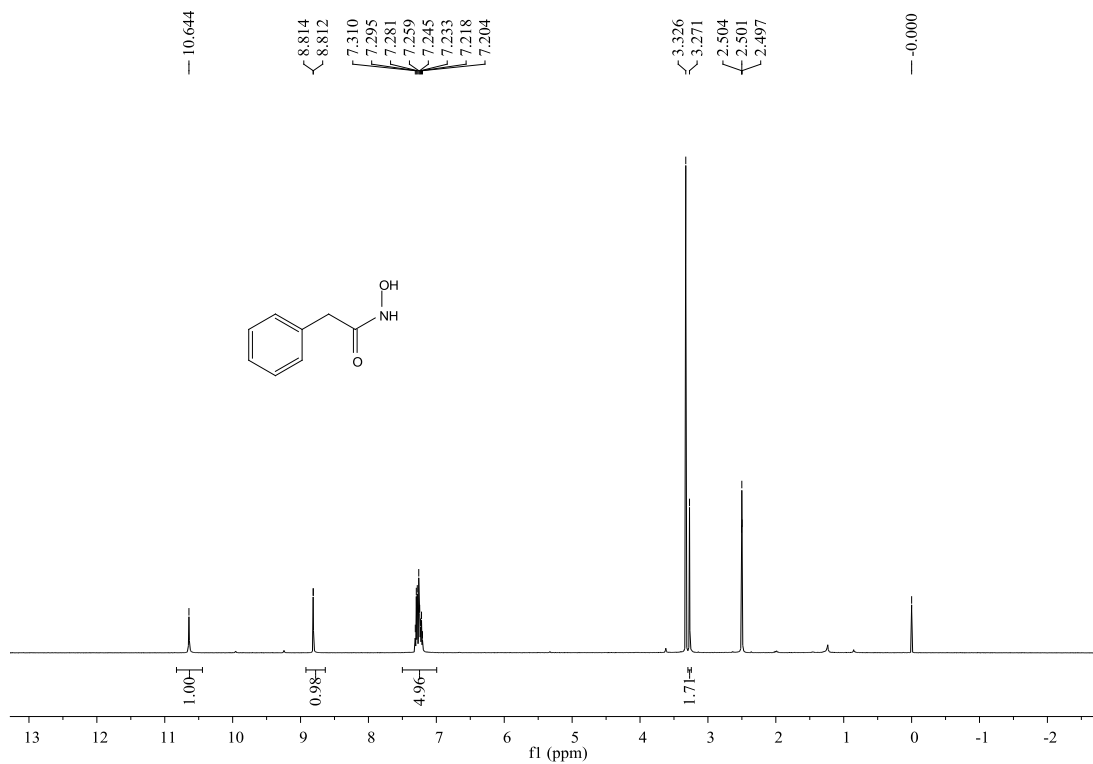

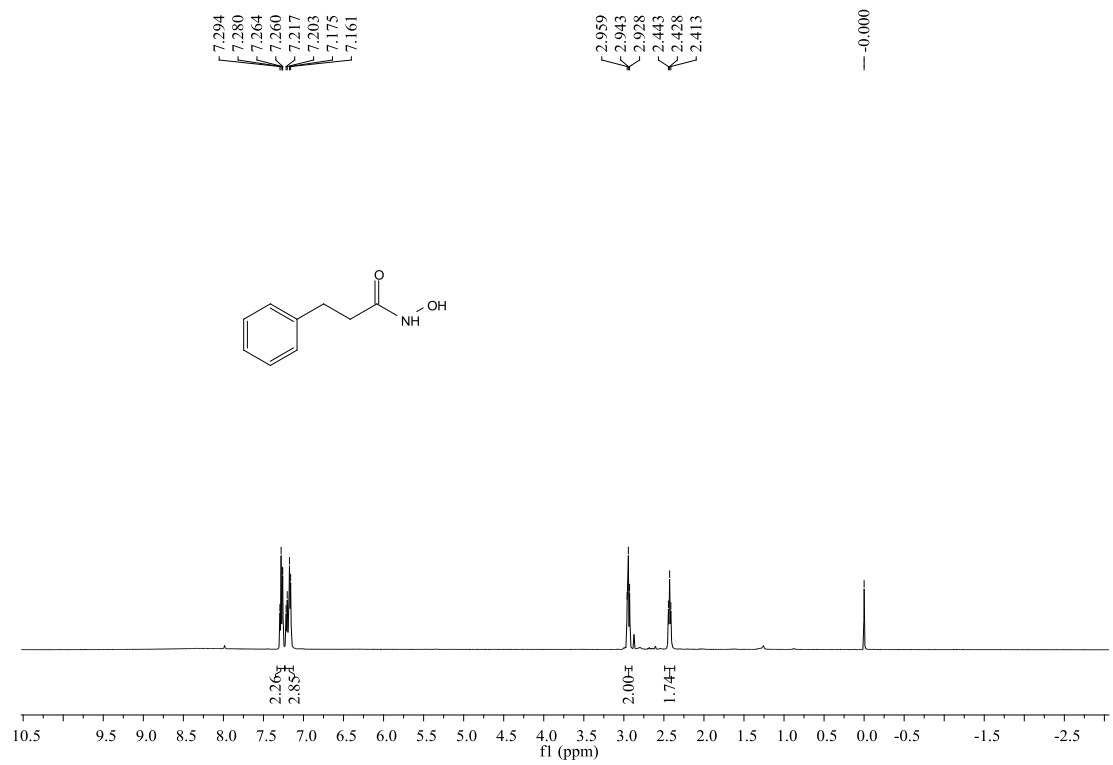

<sup>1</sup>H NMR: *N*-hydroxy-2-phenylpropanamide (**1e'**)

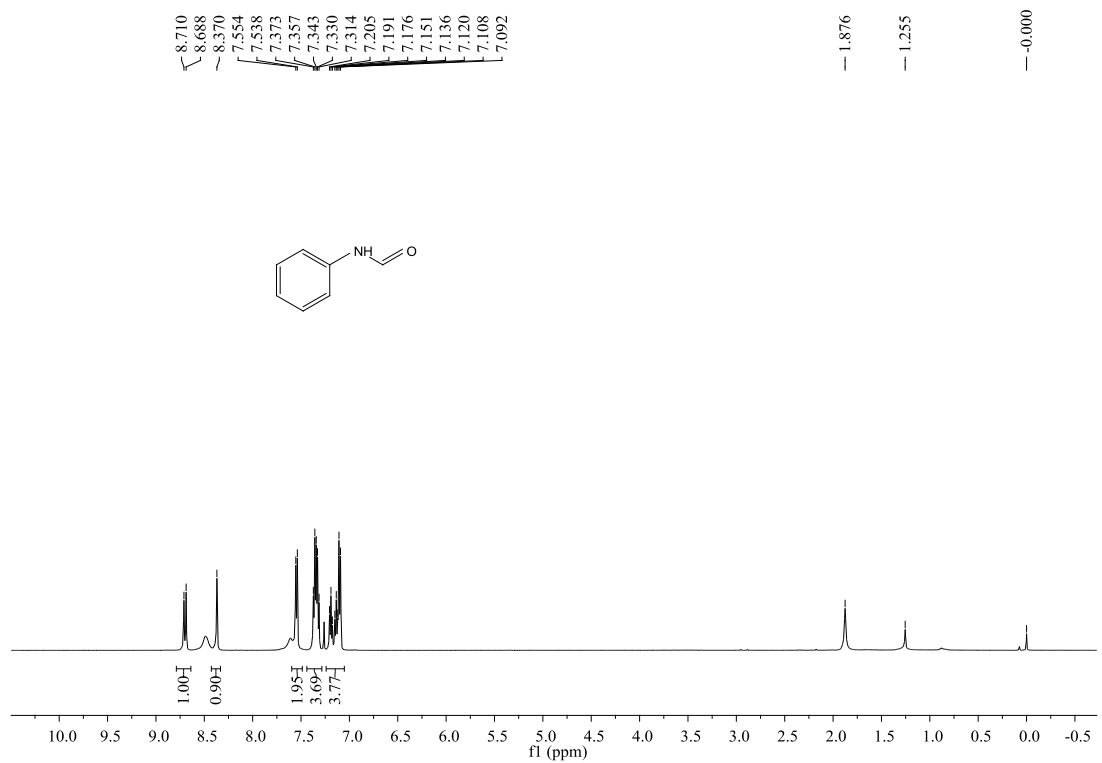

<sup>1</sup>H NMR: *N*-phenylformamide (**2a**) (from **1a**)

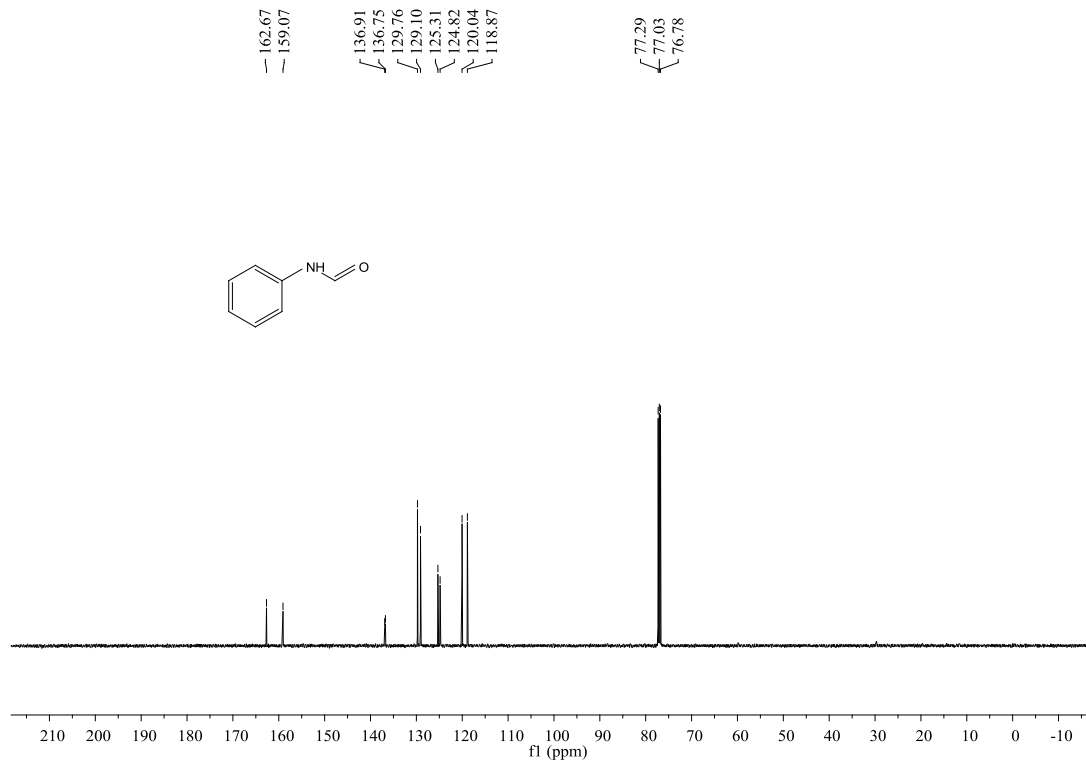

$^{13}\text{C}$  NMR: *N*-phenylformamide (**2a**) (from **1a**)

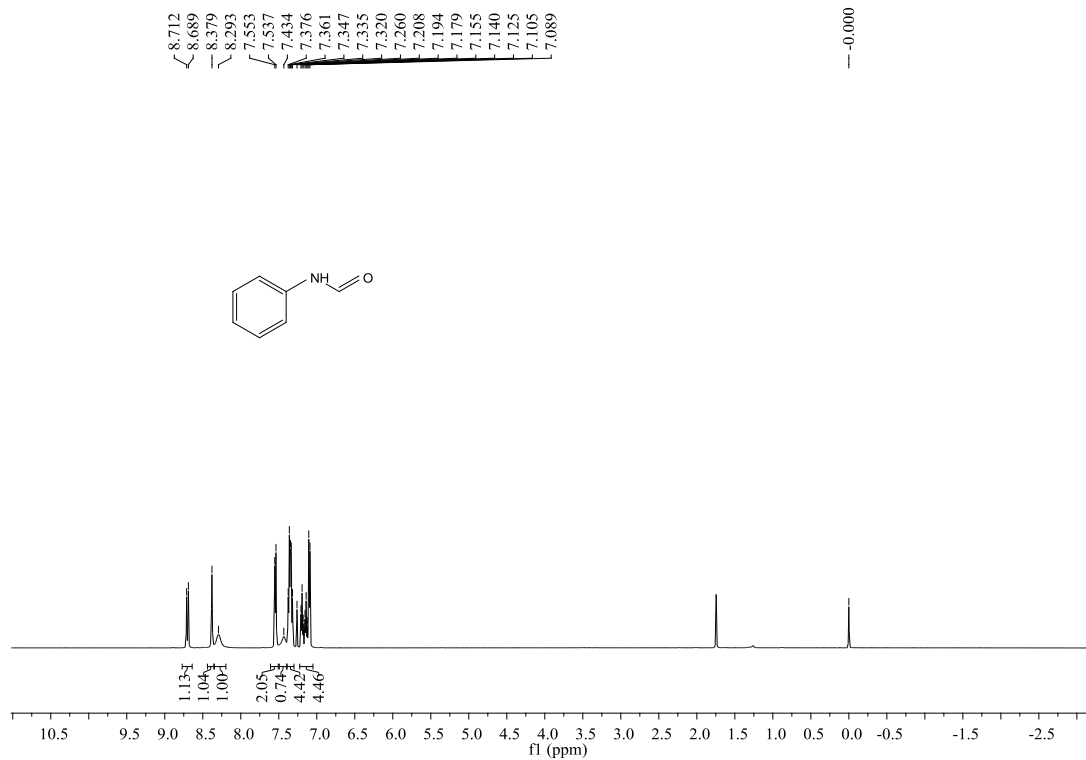

$^1\text{H}$  NMR: *N*-phenylformamide (**2a**) (from **3a**)

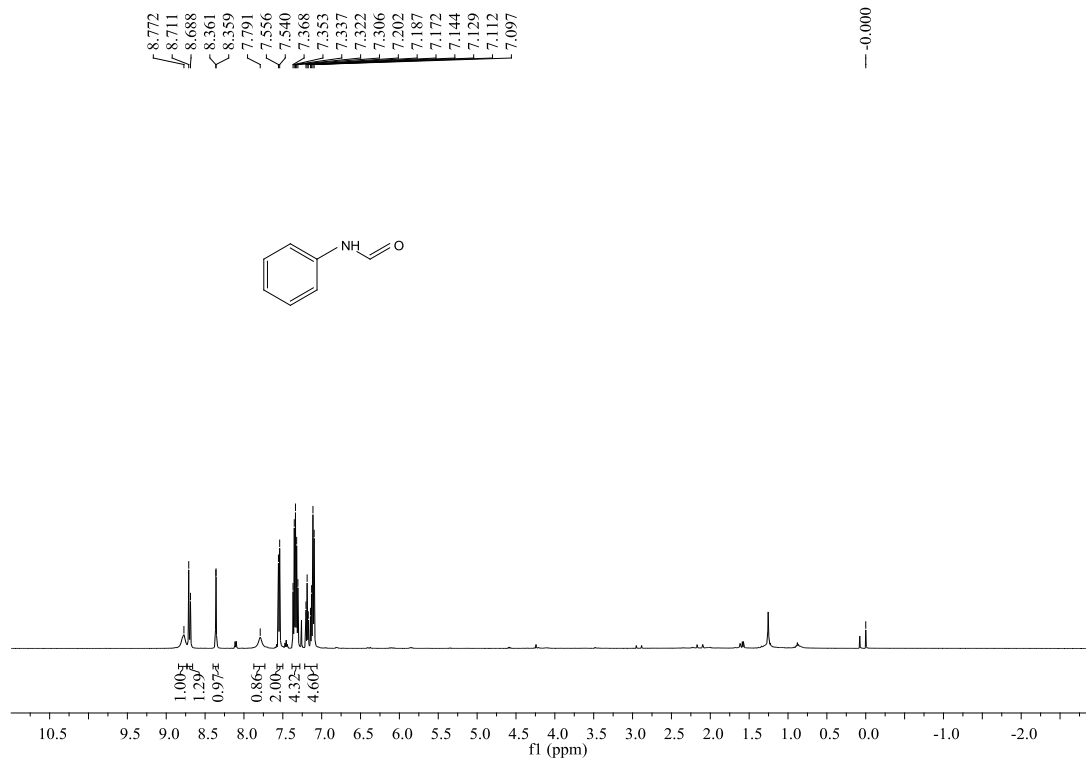

<sup>1</sup>H NMR: *N*-phenylformamide (2a) (from 4a)

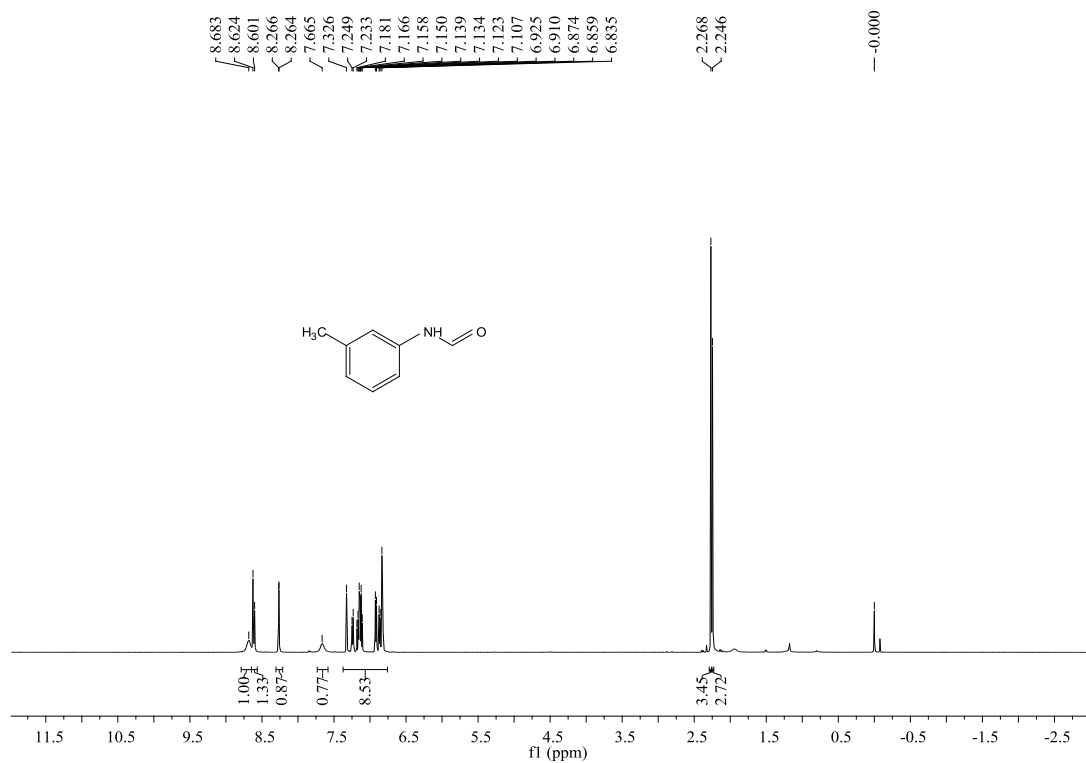

<sup>1</sup>H NMR: *N*-*m*-tolylformamide (2b)

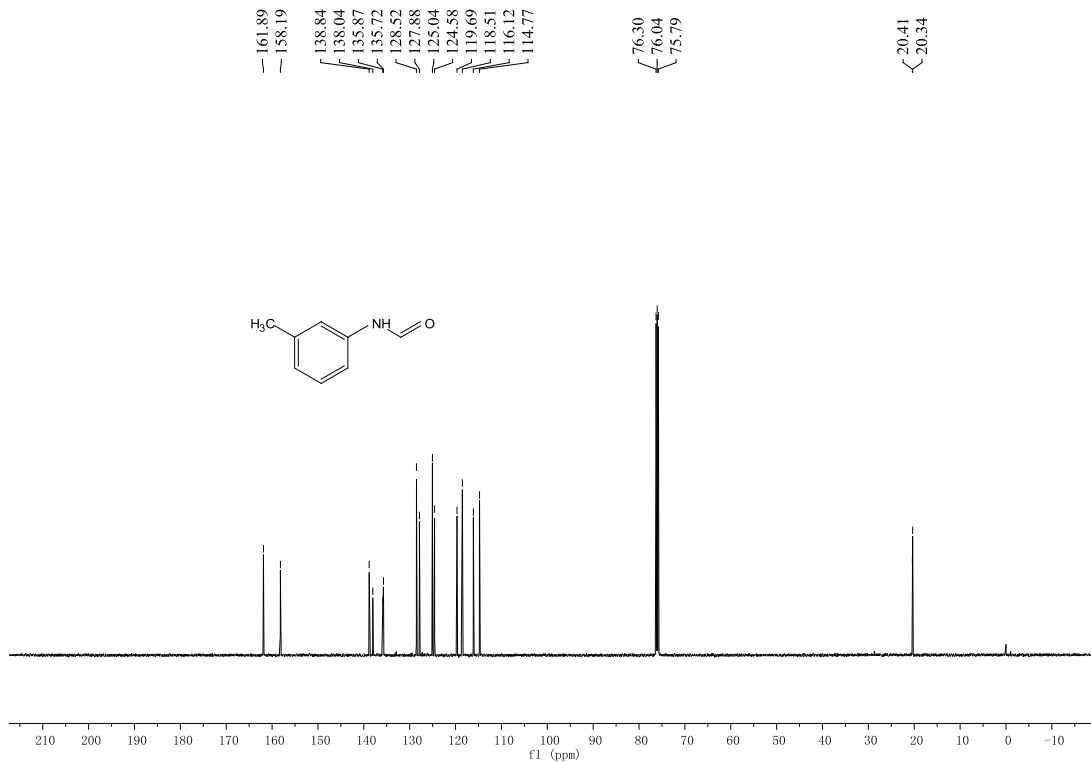

<sup>13</sup>C NMR: *N-m*-tolylformamide (**2b**)

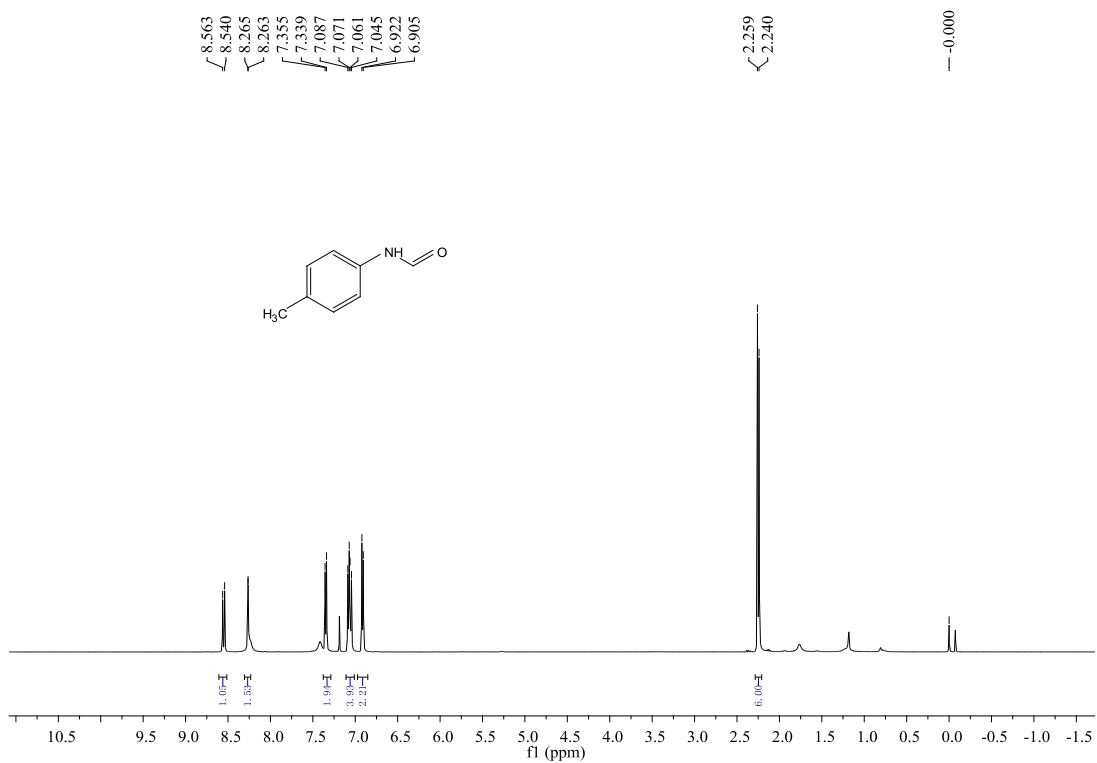

<sup>1</sup>H NMR: *N-p*-tolylformamide (**2c**) (from **1c**)

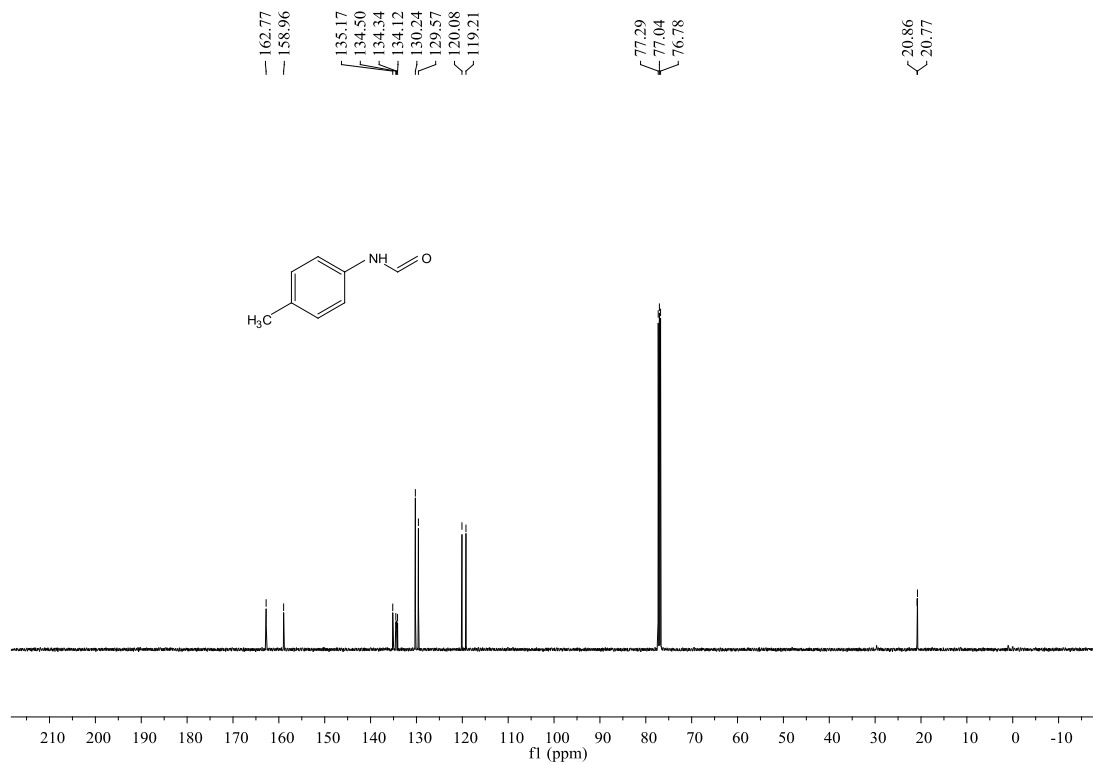

$^{13}\text{H}$  NMR: *N-p*-tolylformamide (**2c**) (from **1c**)

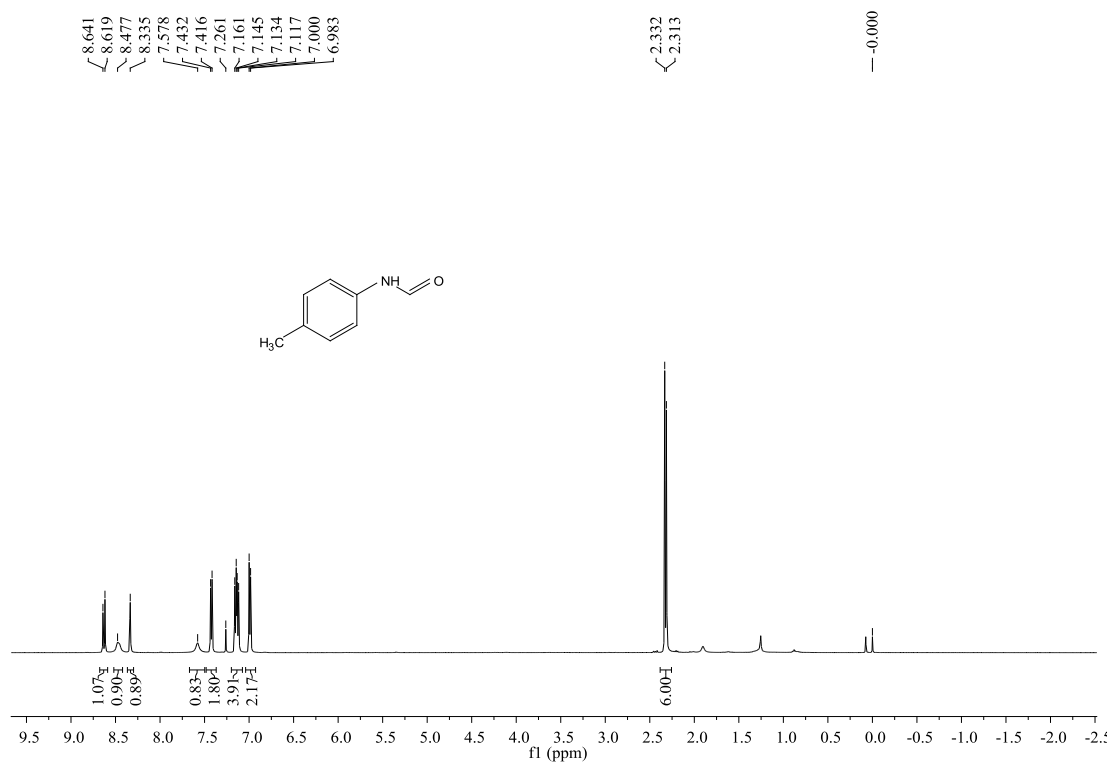

$^1\text{H}$  NMR: *N-p*-tolylformamide (**2c**) (from **4c**)



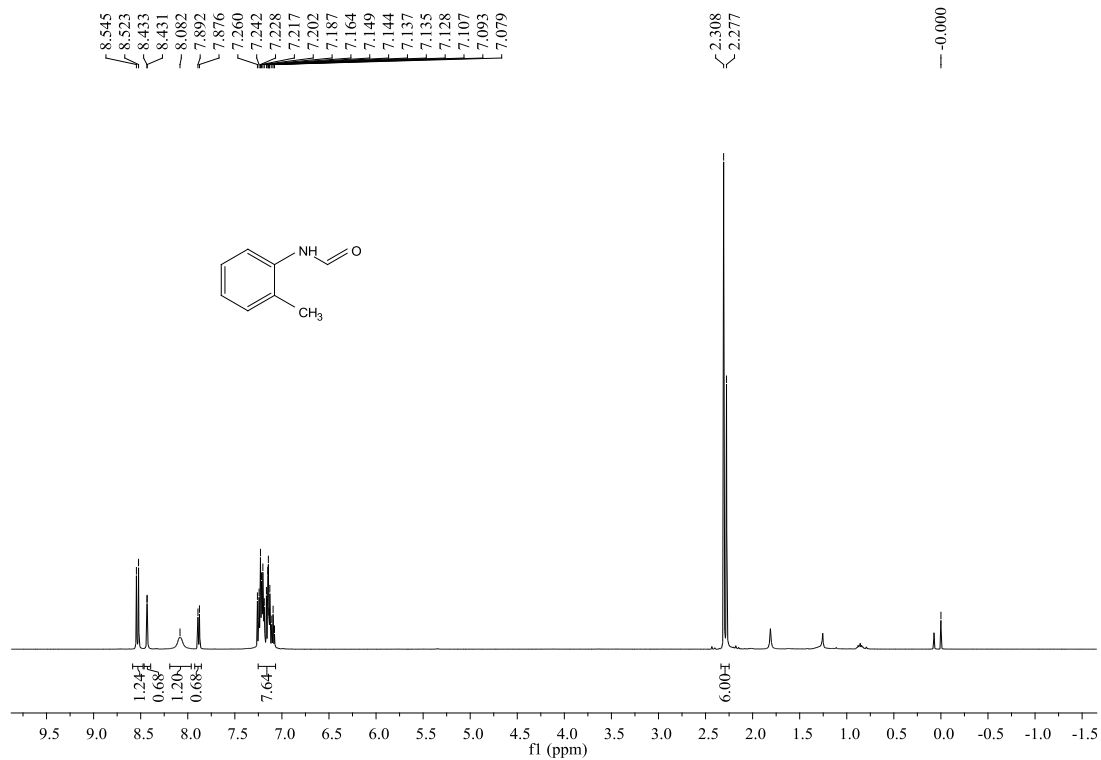

<sup>1</sup>H NMR: *N*-*o*-tolylformamide (2d)

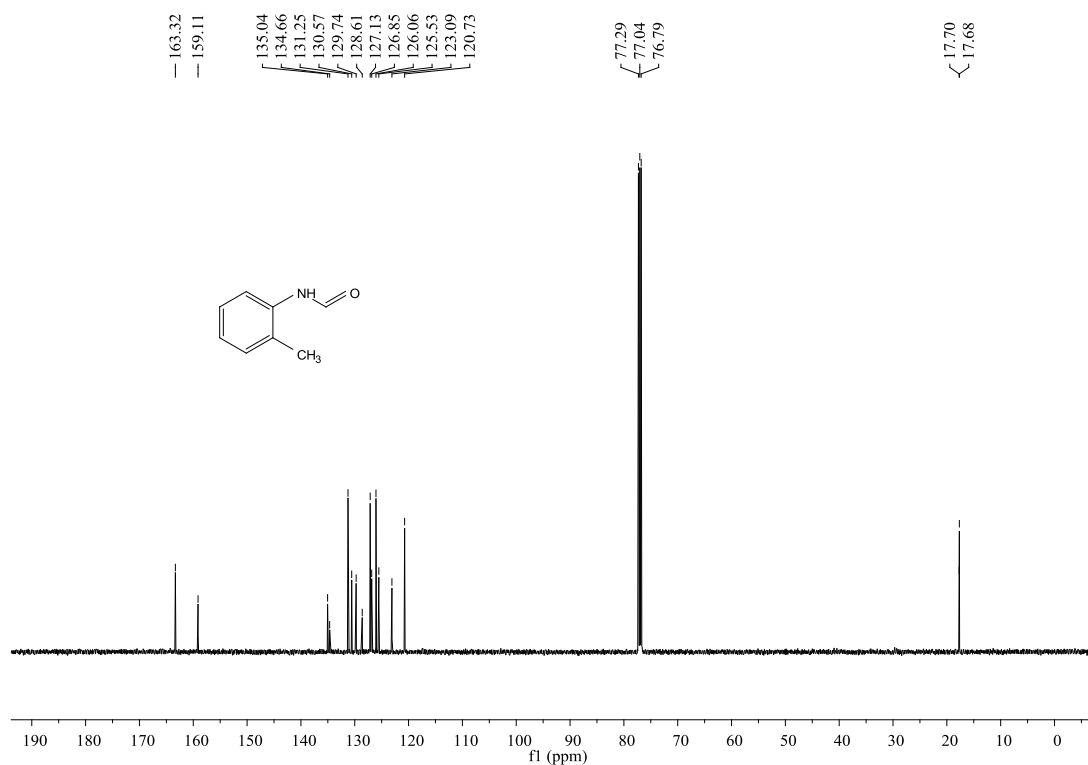

<sup>13</sup>C NMR: *N*-*o*-tolylformamide (2d)

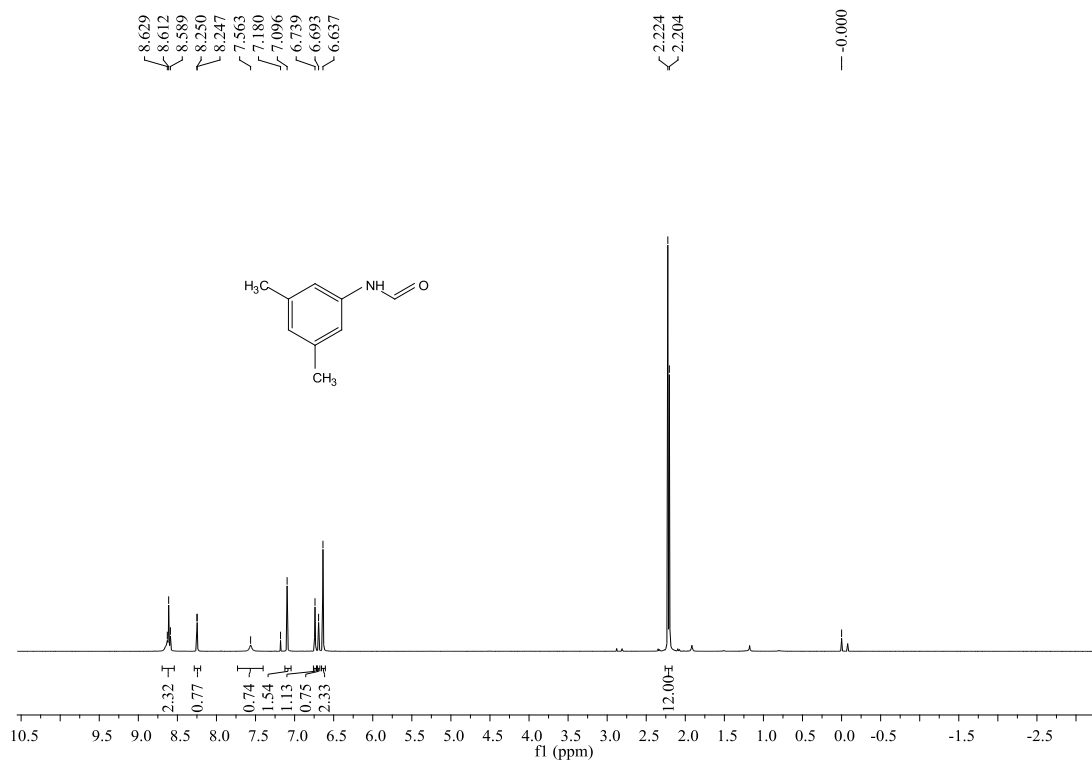

<sup>1</sup>H NMR: *N*-(3,5-dimethylphenyl)formamide (2e)

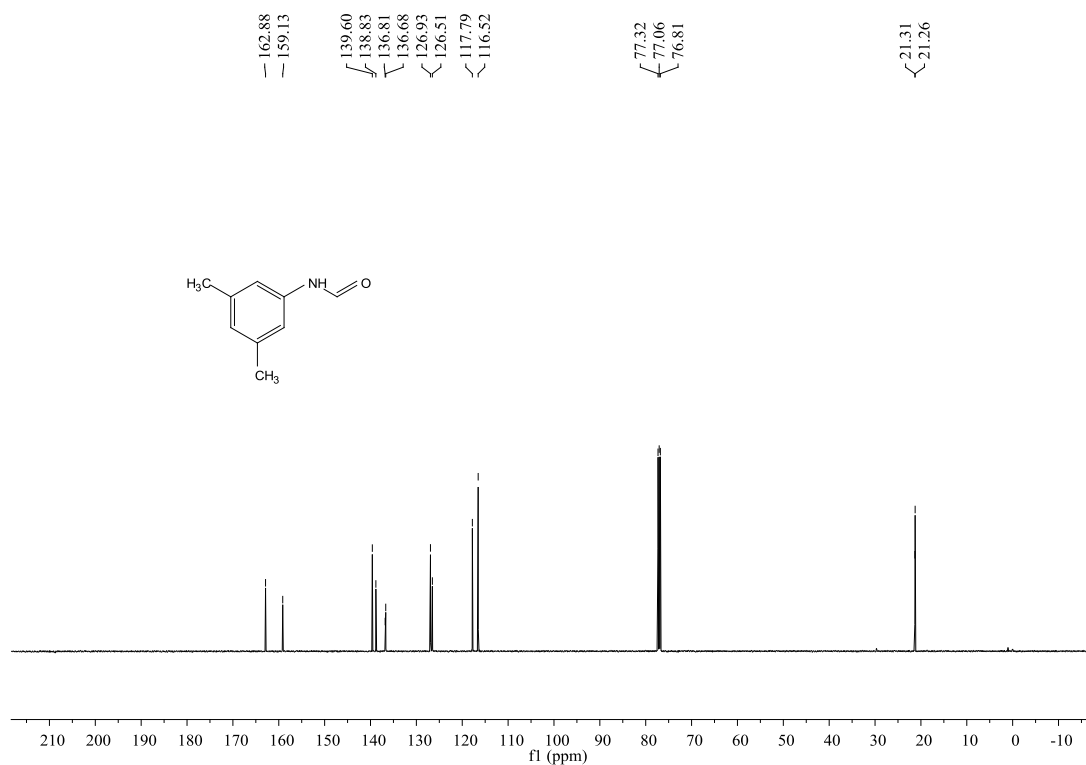

<sup>13</sup>C NMR: *N*-(3,5-dimethylphenyl)formamide (2e)

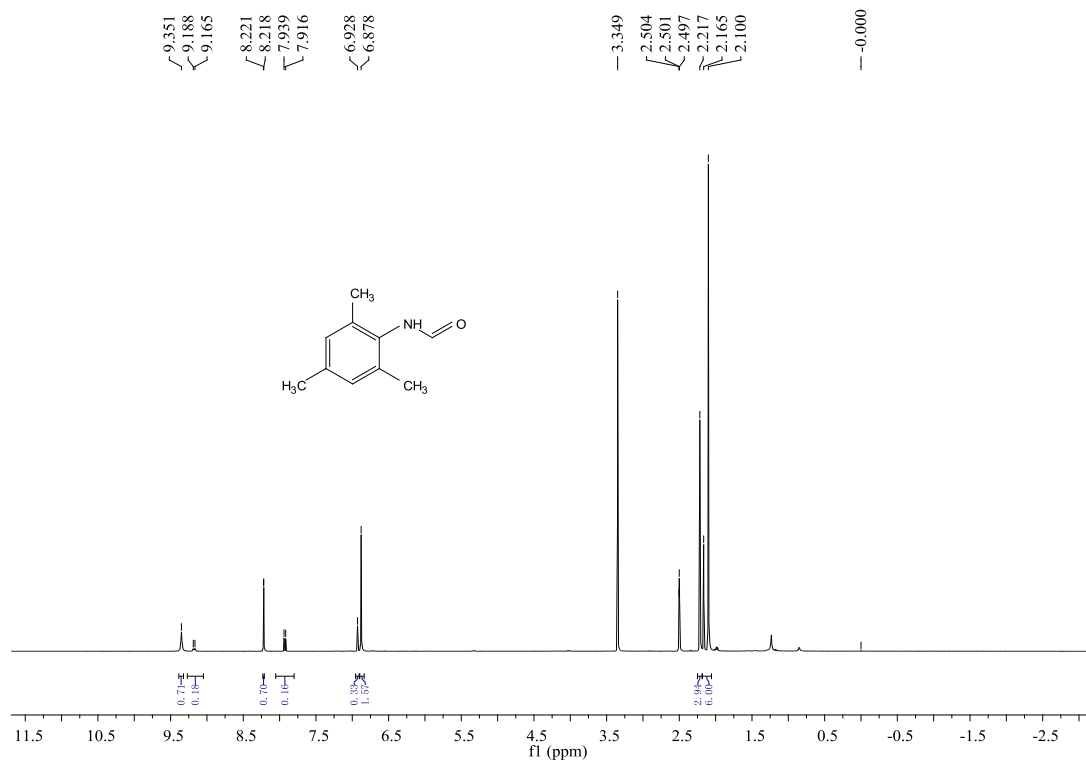

<sup>1</sup>H NMR: *N*-mesitylformamide (**2f**)

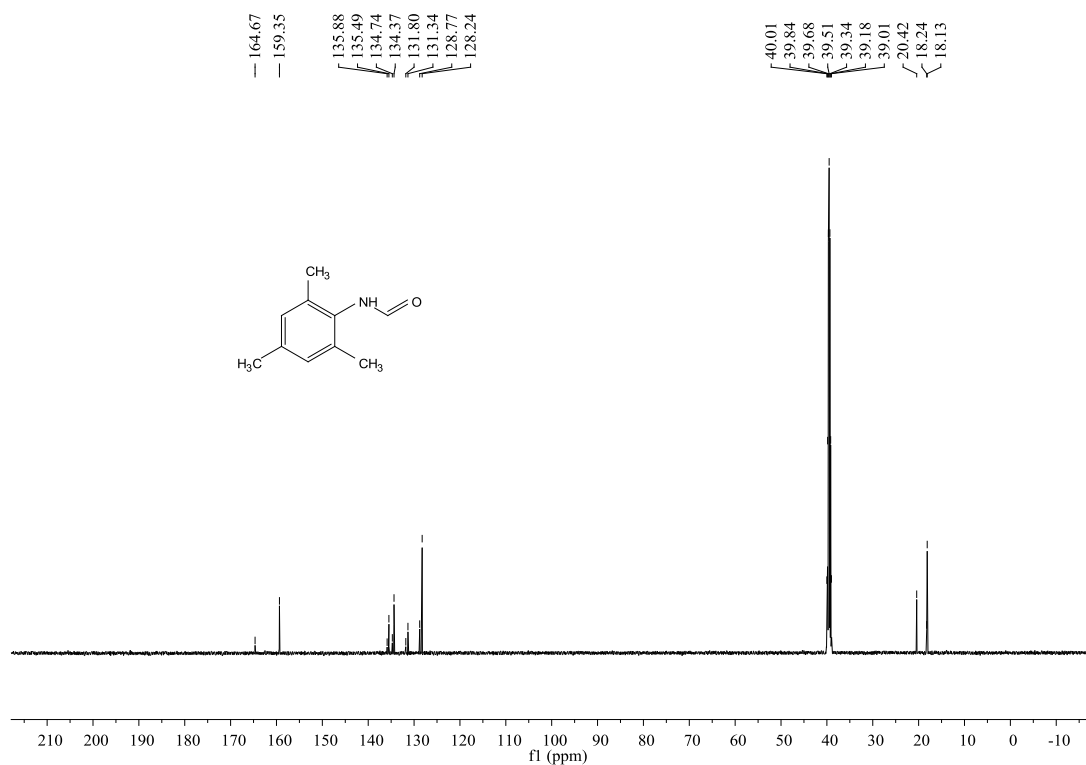

<sup>13</sup>C NMR: *N*-mesitylformamide (**2f**)

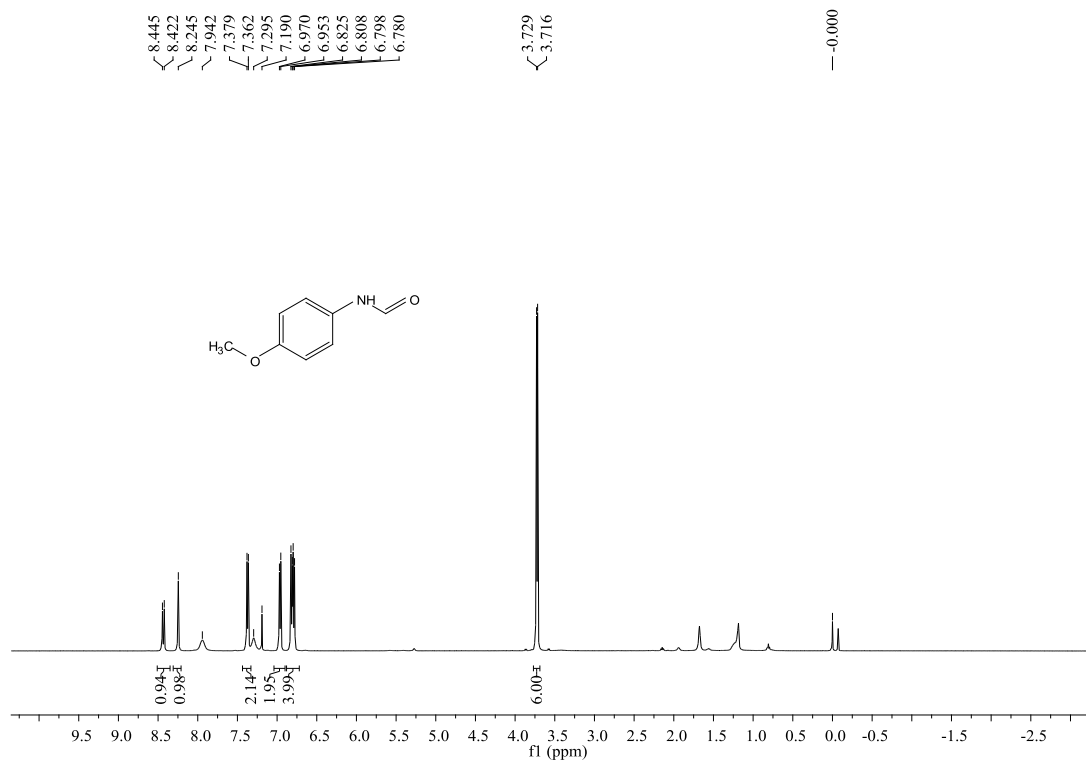

<sup>1</sup>H NMR: *N*-(4-methoxyphenyl)formamide (**2g**) (from **1g**)

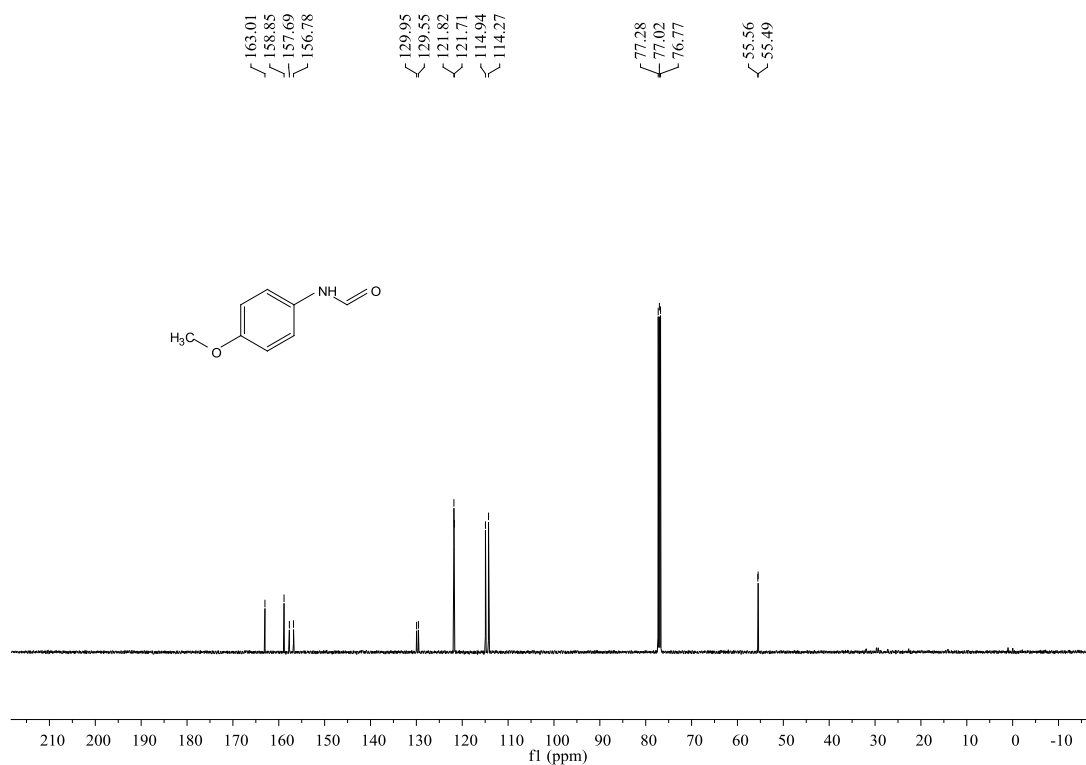

<sup>13</sup>C NMR: *N*-(4-methoxyphenyl)formamide (**2g**) (from **1g**)

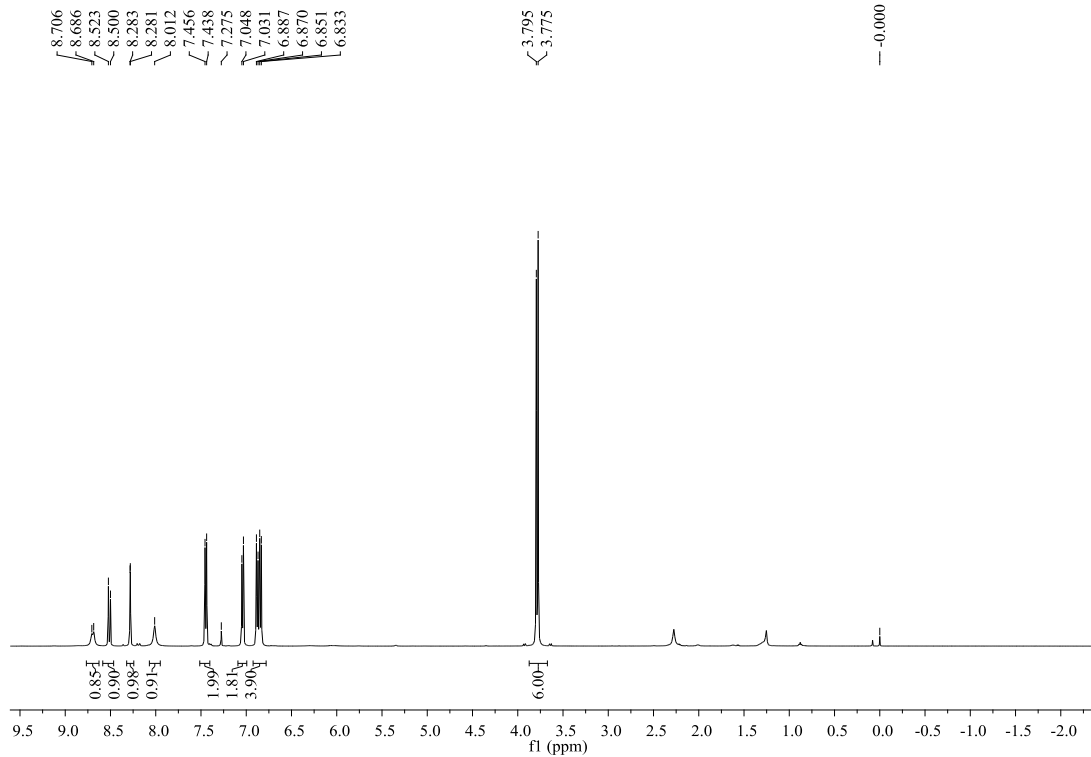

<sup>1</sup>H NMR: *N*-(4-methoxyphenyl)formamide (**2g**) (from **3c**)

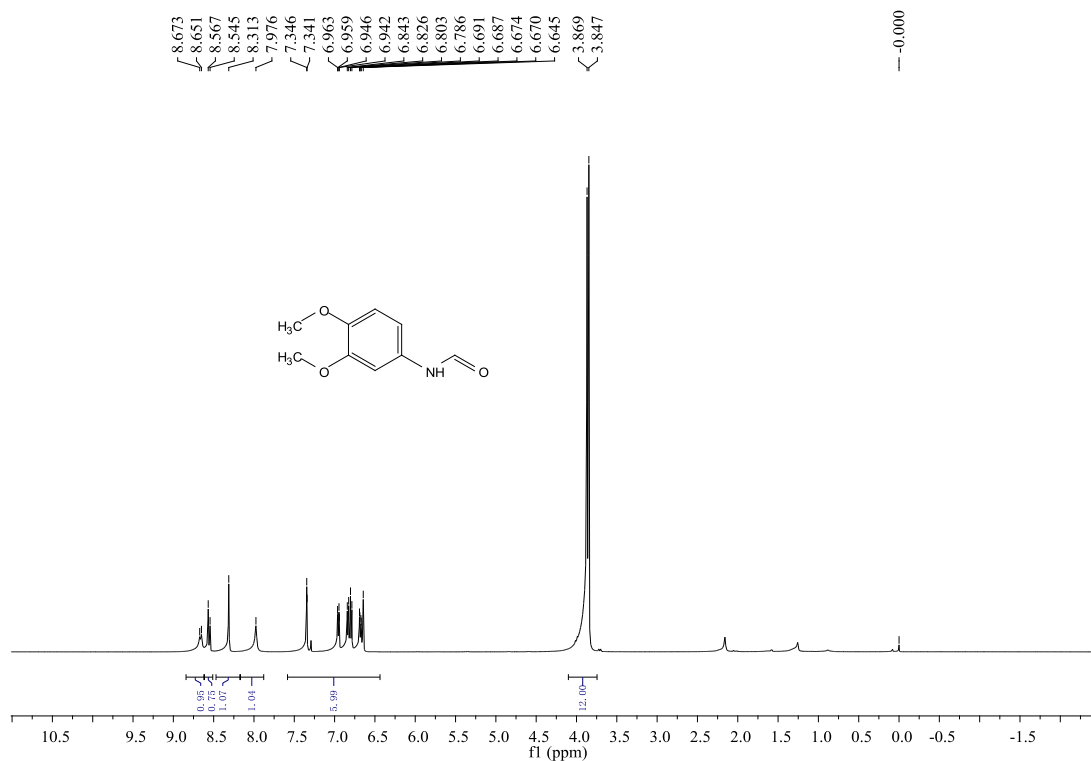

<sup>1</sup>H NMR: *N*-(3,4-dimethoxyphenyl)formamide (**2h**)

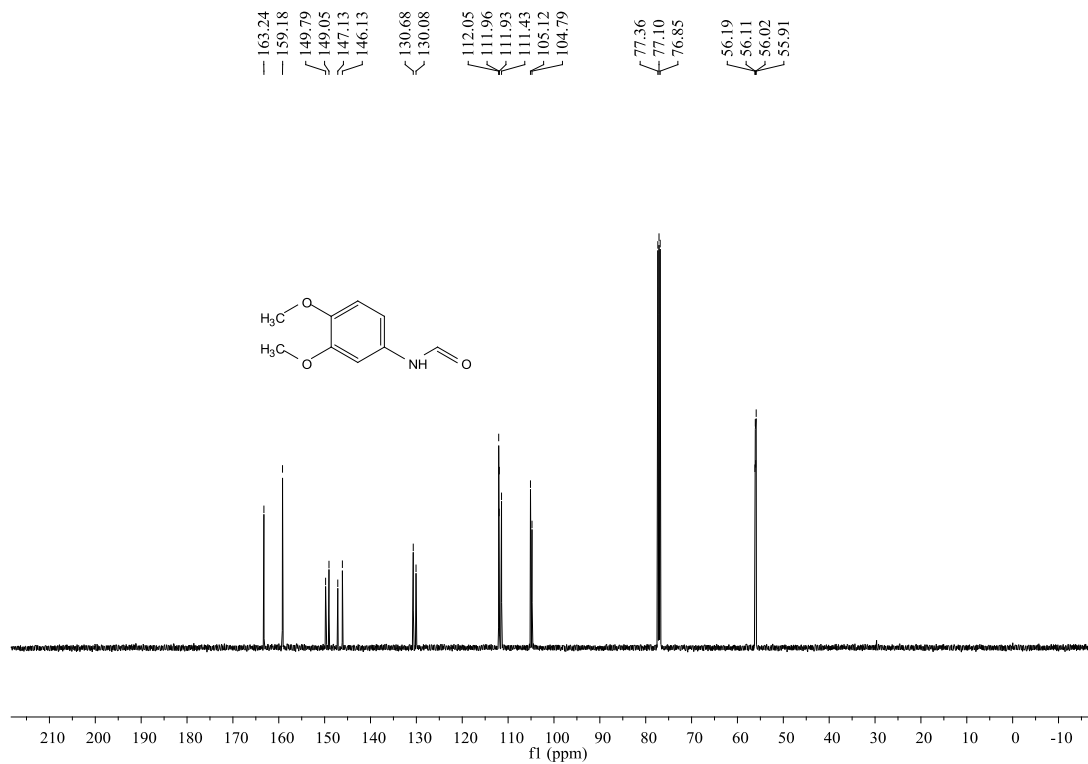

$^{13}\text{C}$  NMR: *N*-(3,4-dimethoxyphenyl)formamide (**2h**)

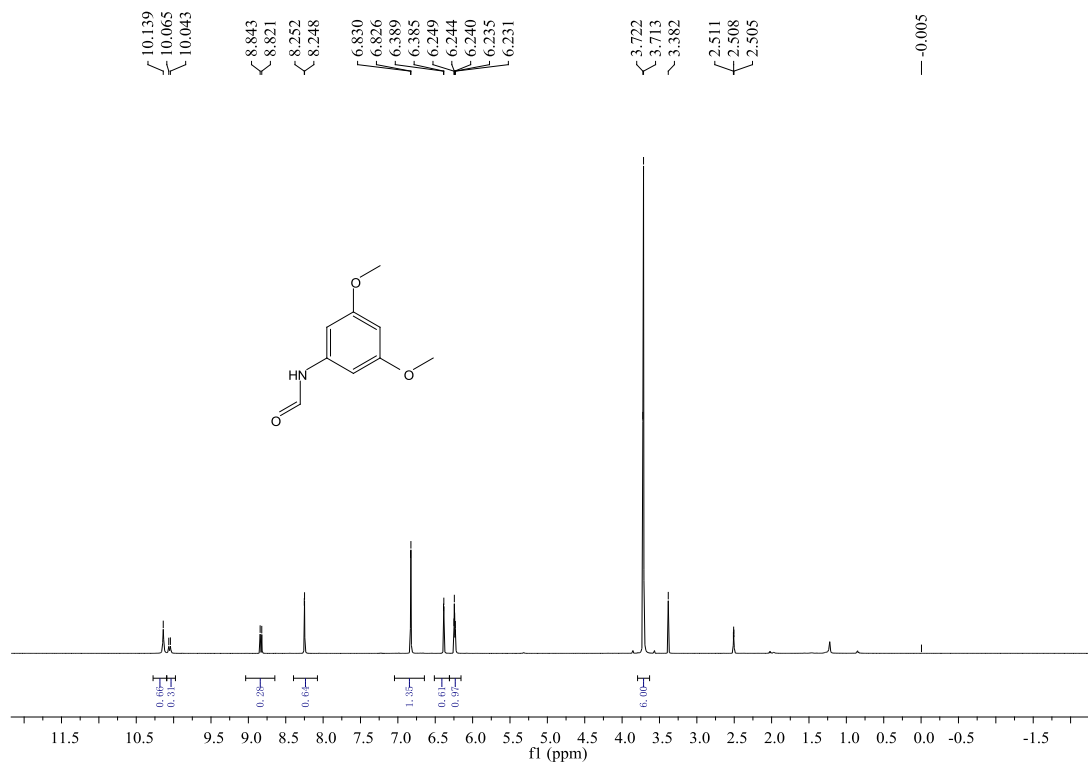

$^1\text{H}$  NMR: *N*-(3,5-dimethoxyphenyl)formamide (**2i**)

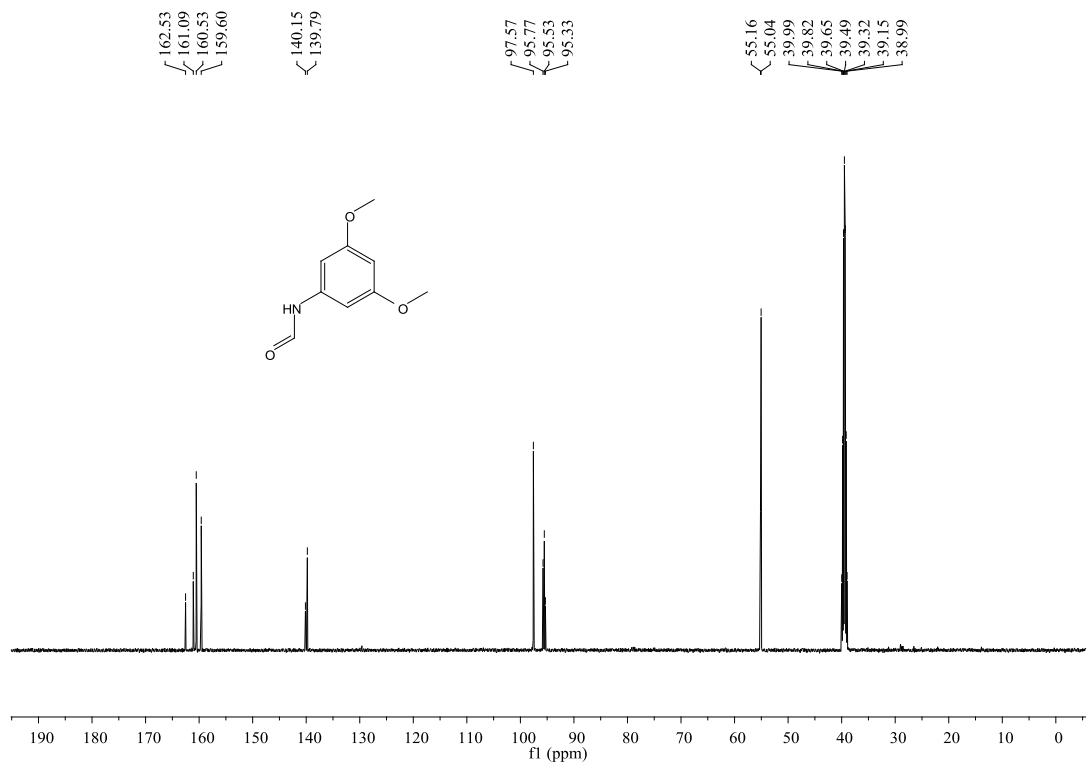

<sup>13</sup>C NMR: *N*-(3,5-dimethoxyphenyl)formamide (**2i**)

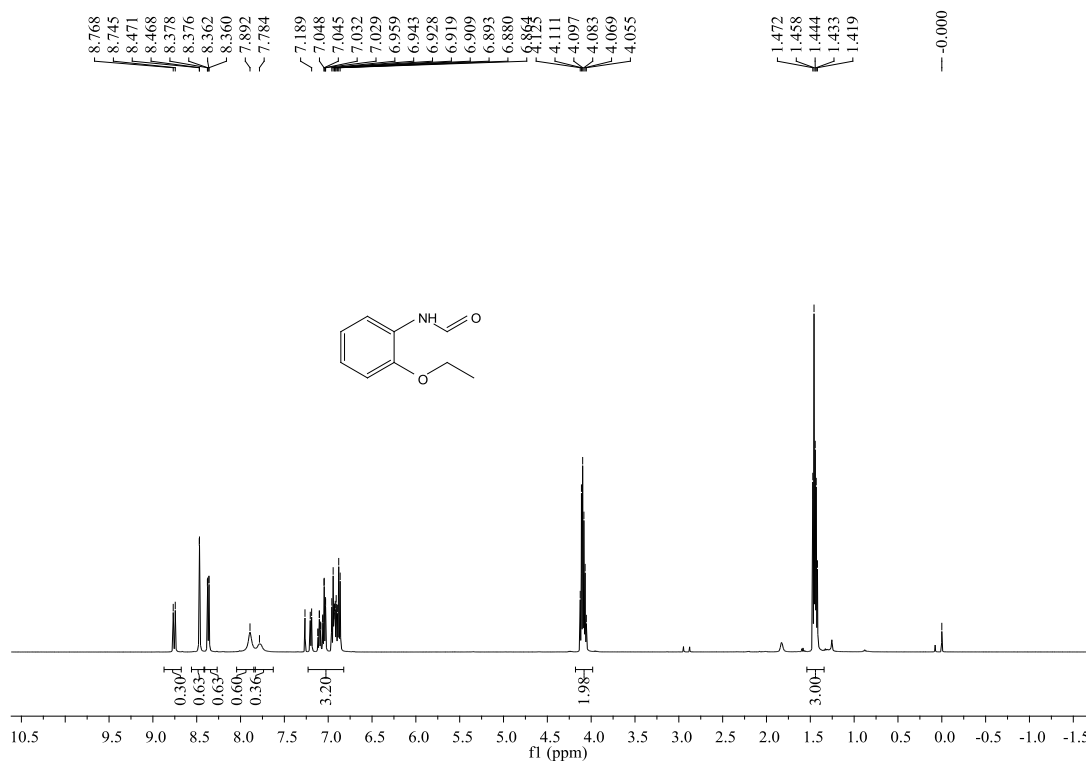

<sup>1</sup>H NMR: *N*-(2-ethoxyphenyl)formamide (**2j**)

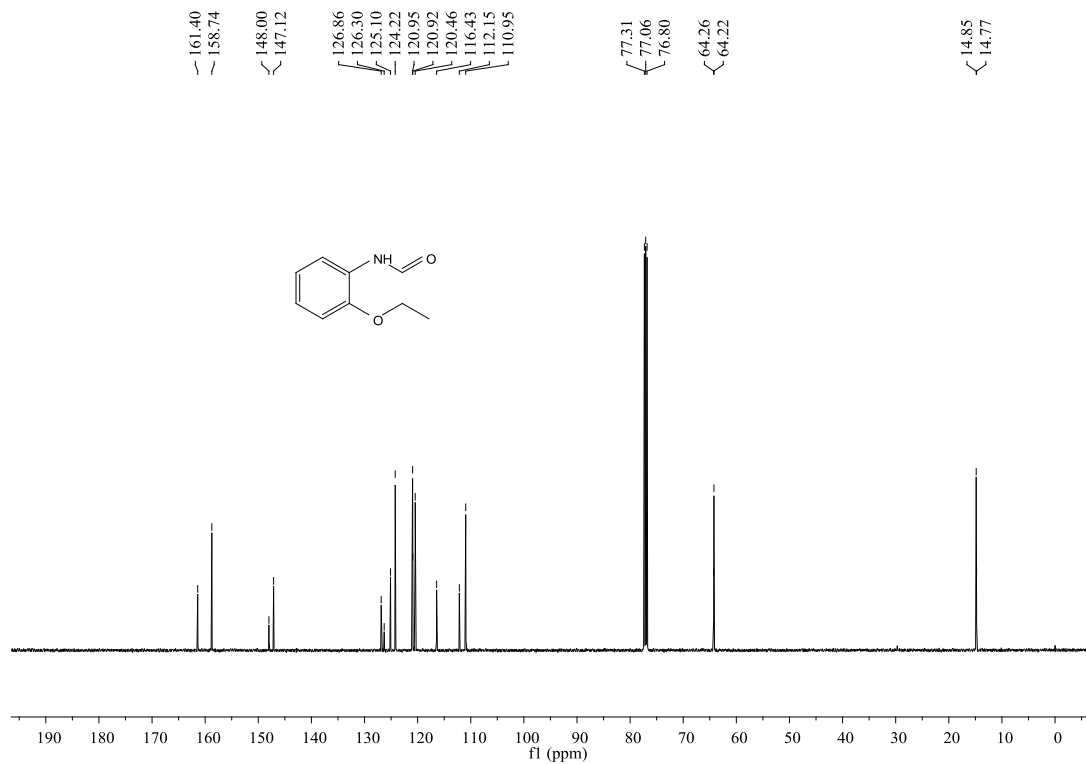

<sup>13</sup>C NMR: *N*-(2-ethoxyphenyl)formamide (**2j**)

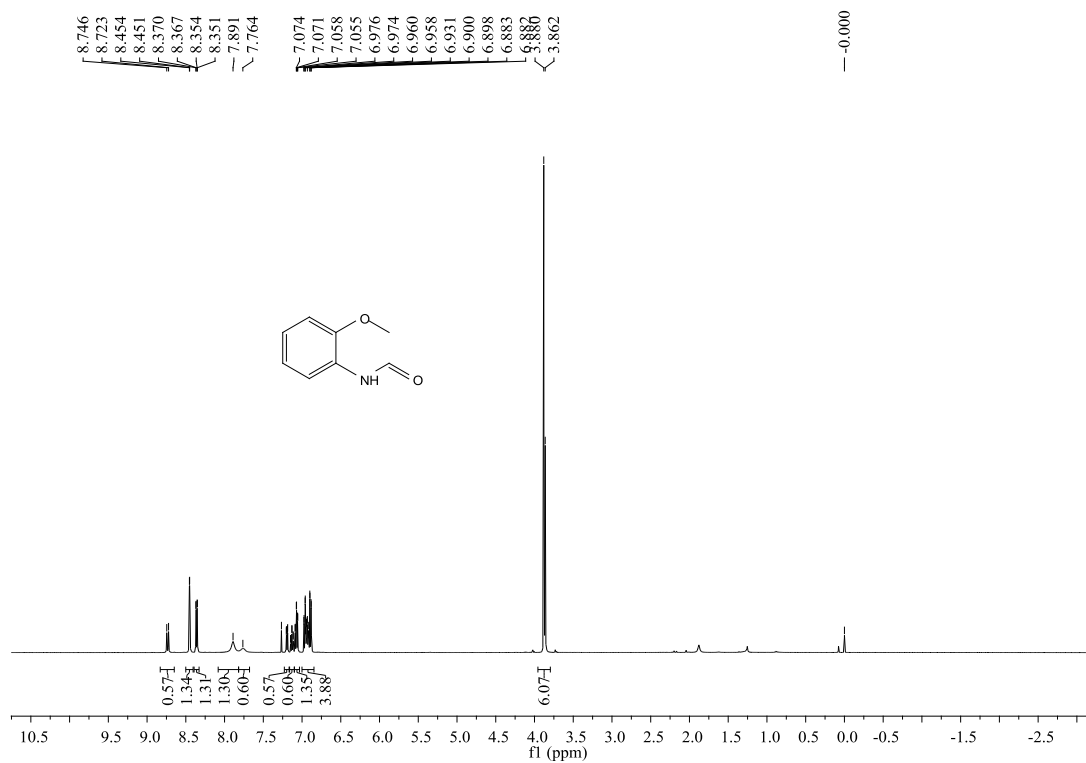

<sup>1</sup>H NMR: *N*-(2-methoxyphenyl)formamide (**2k**)



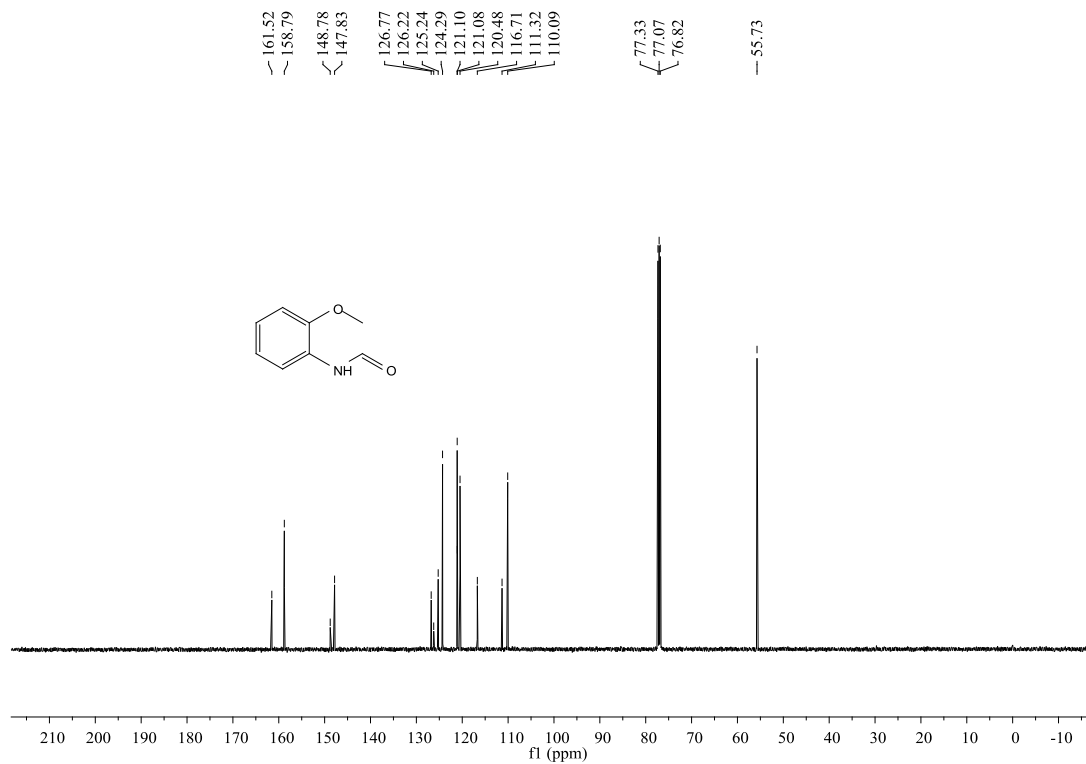

<sup>13</sup>C NMR: *N*-(2-methoxyphenyl)formamide (**2k**)

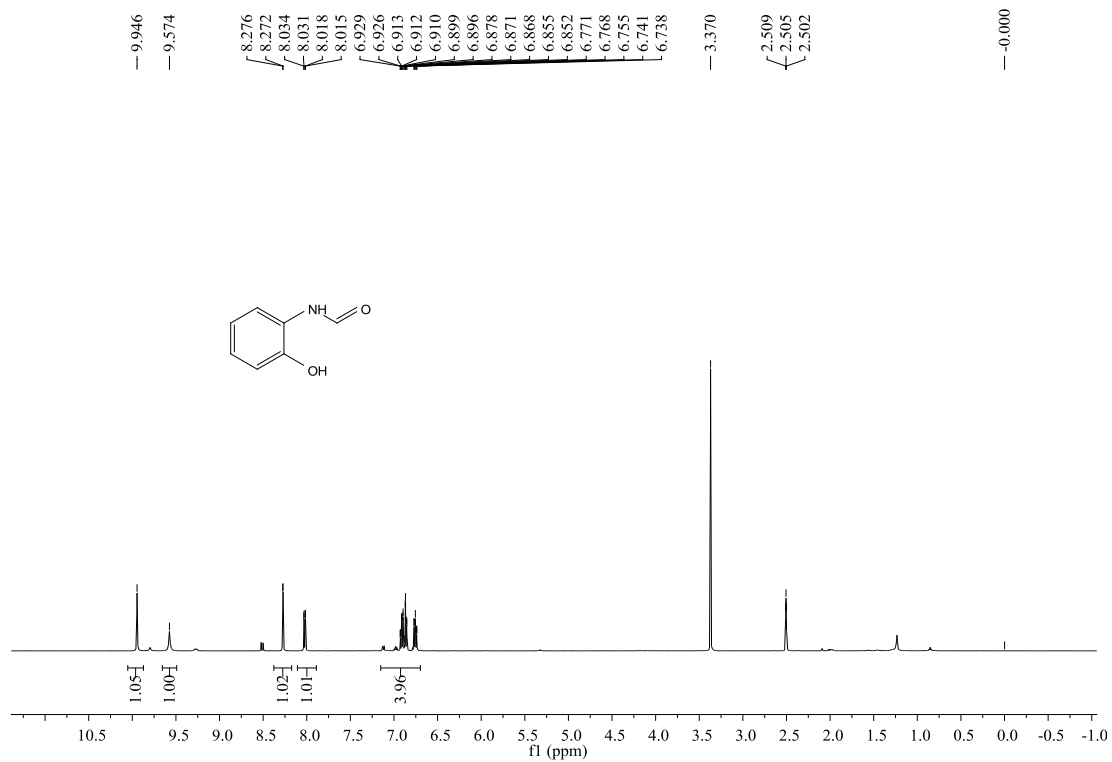

<sup>1</sup>H NMR: *N*-(2-hydroxyphenyl)formamide (**2l**)

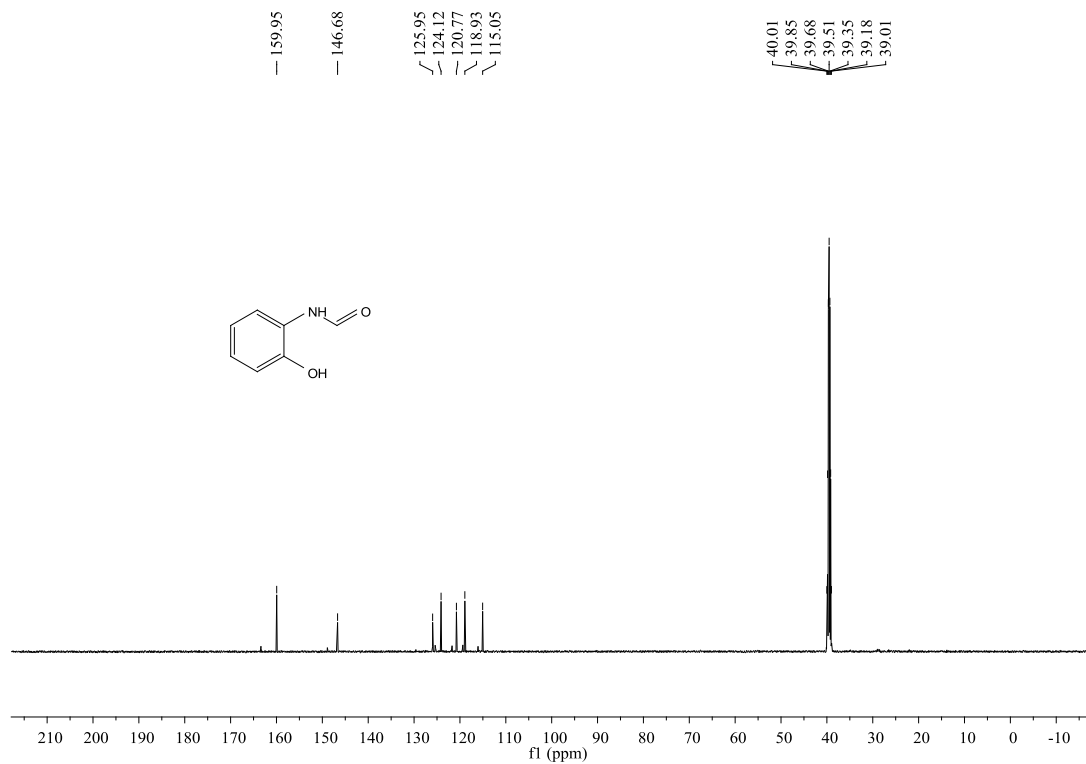

$^{13}\text{C}$  NMR: *N*-(2-hydroxyphenyl)formamide (**21**)

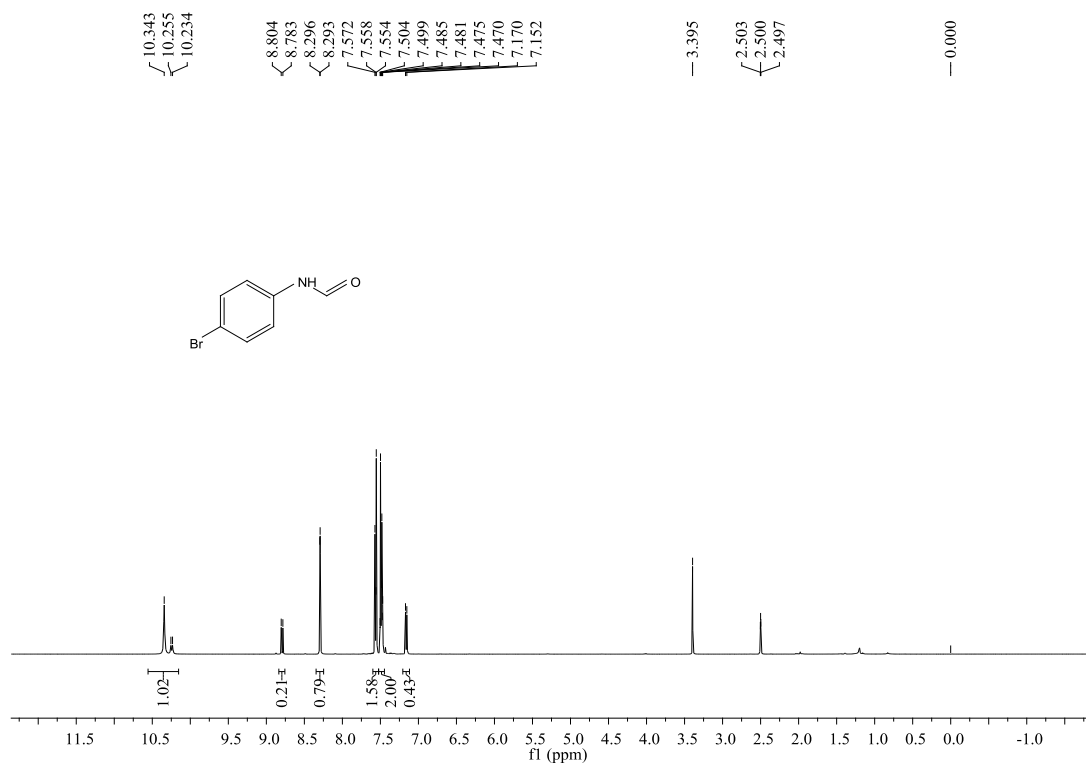

$^1\text{H}$  NMR: *N*-(4-bromophenyl)formamide (**2m**)

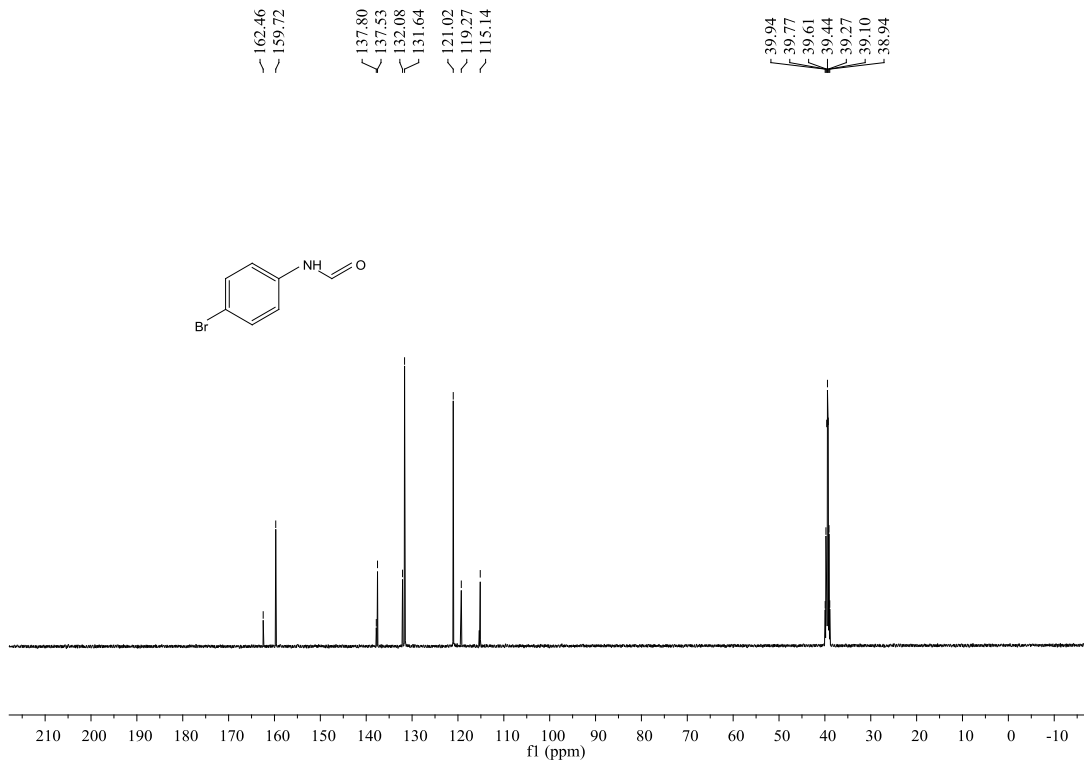

$^{13}\text{C}$  NMR: *N*-(4-bromophenyl)formamide (**2m**)

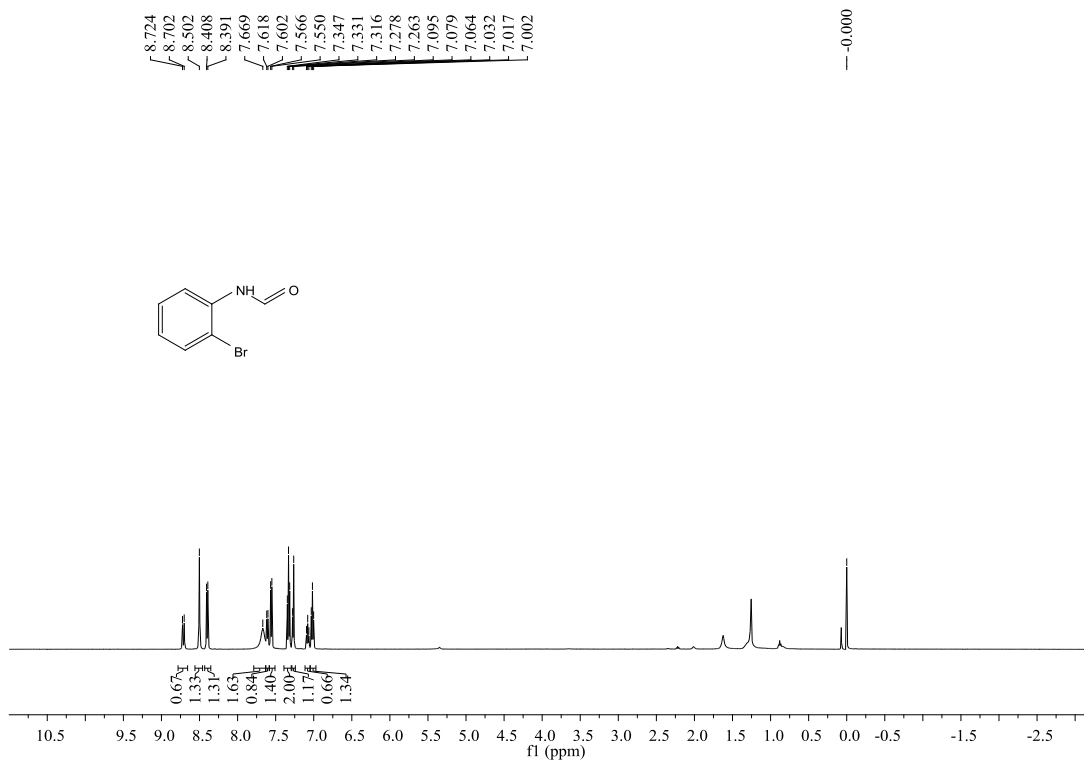

$^1\text{H}$  NMR: *N*-(2-bromophenyl)formamide (**2n**)

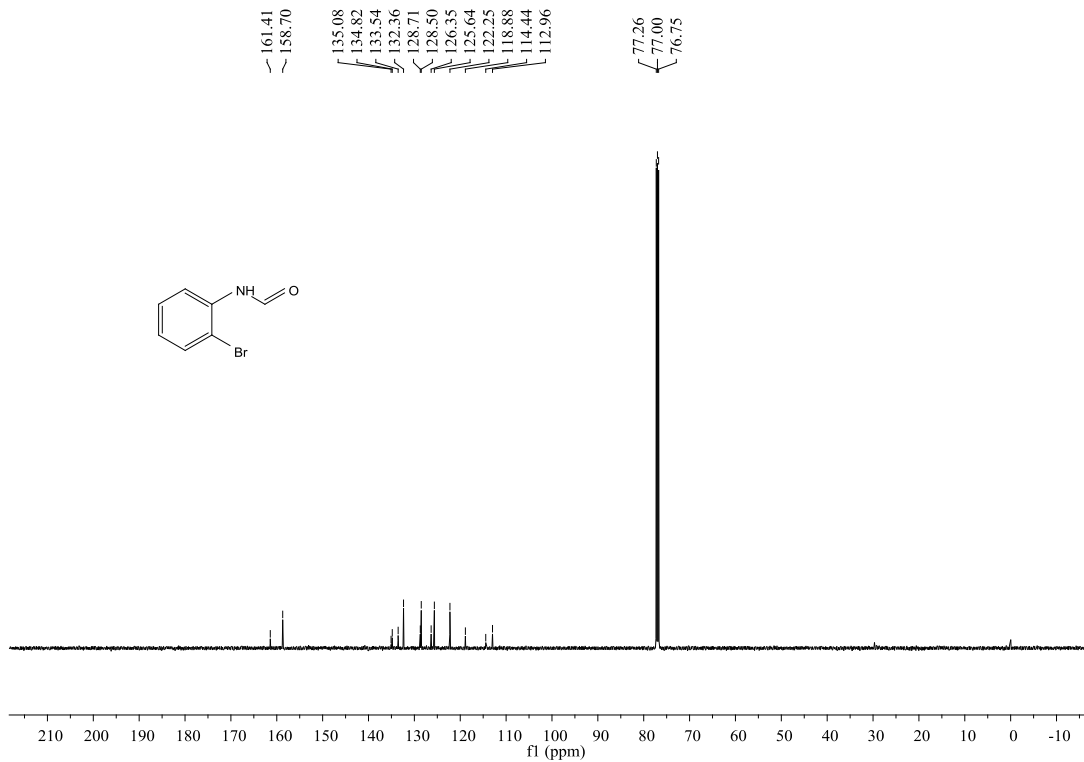

<sup>13</sup>C NMR: *N*-(2-bromophenyl)formamide (**2n**)

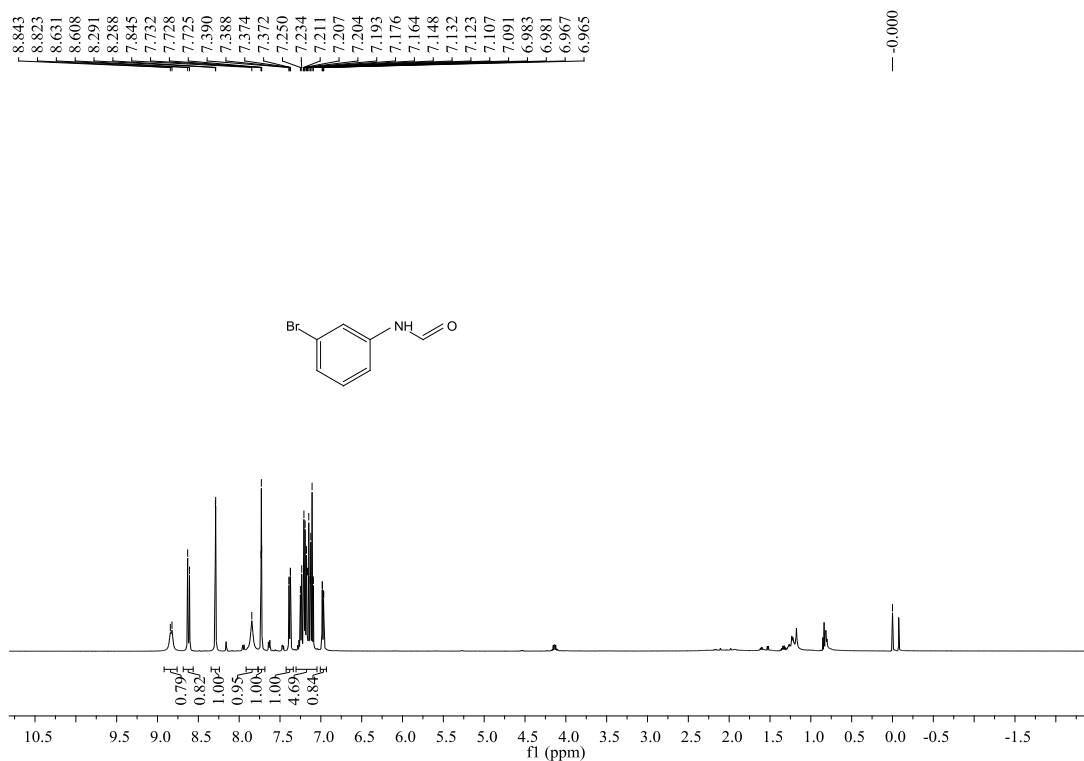

<sup>1</sup>H NMR: *N*-(3-bromophenyl)formamide (**2o**)

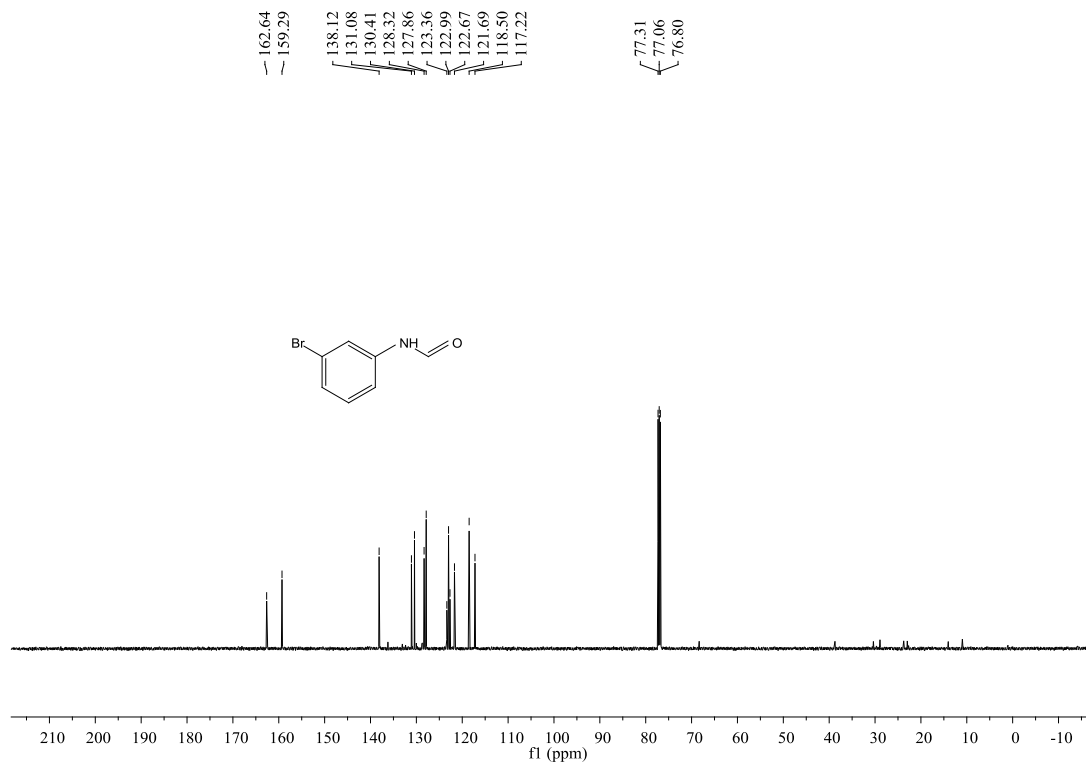

<sup>13</sup>C NMR: *N*-(3-bromophenyl)formamide (**2o**)

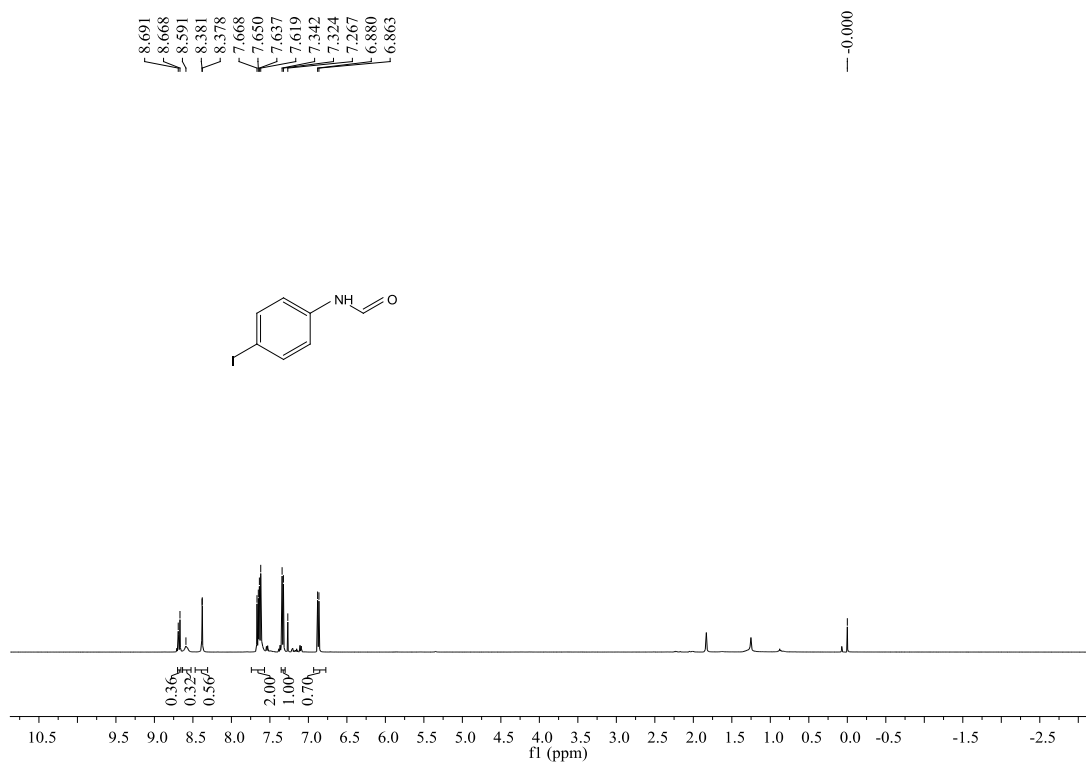

<sup>1</sup>H NMR: *N*-(4-iodophenyl)formamide (**2p**) (from **1p**)

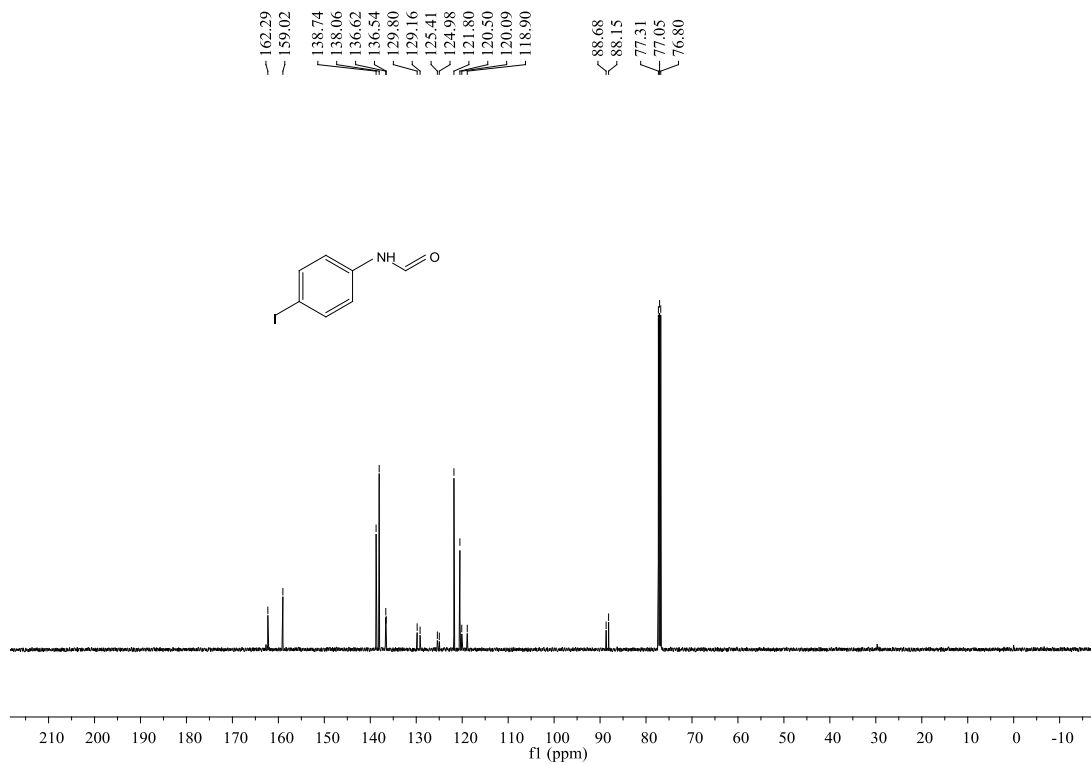

<sup>13</sup>C NMR: *N*-(4-iodophenyl)formamide (**2p**) (from **1p**)

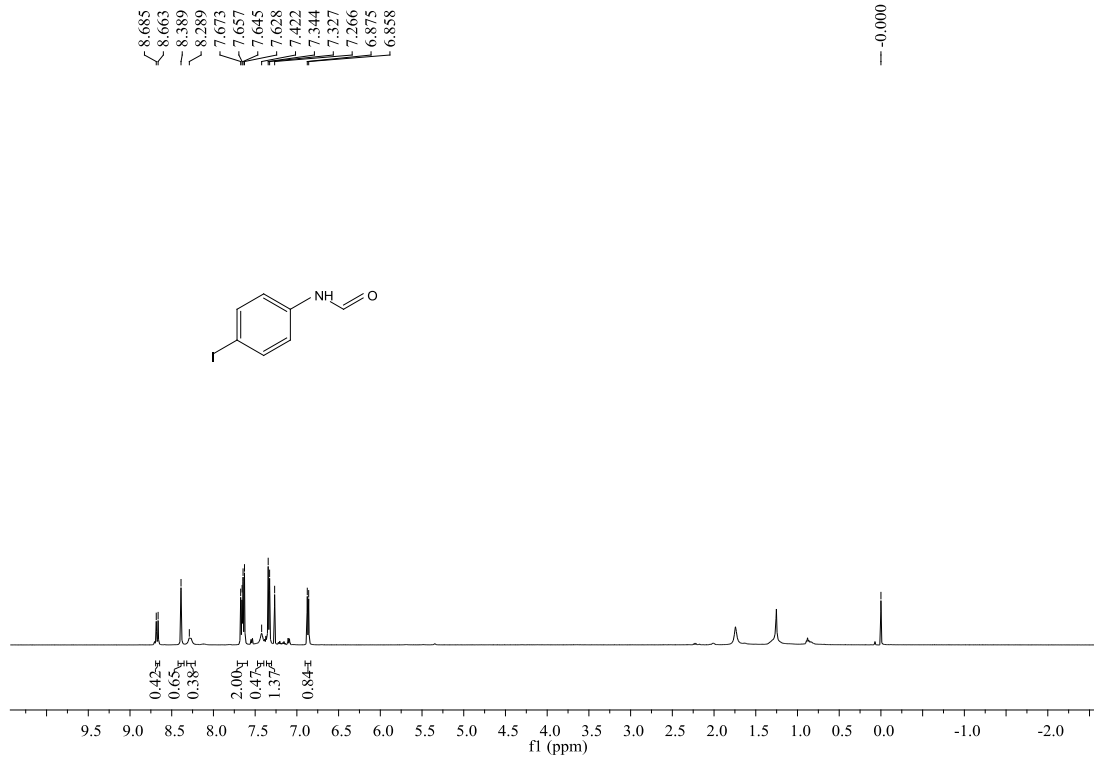

<sup>1</sup>H NMR: *N*-(4-iodophenyl)formamide (**2p**) (from **4p**)

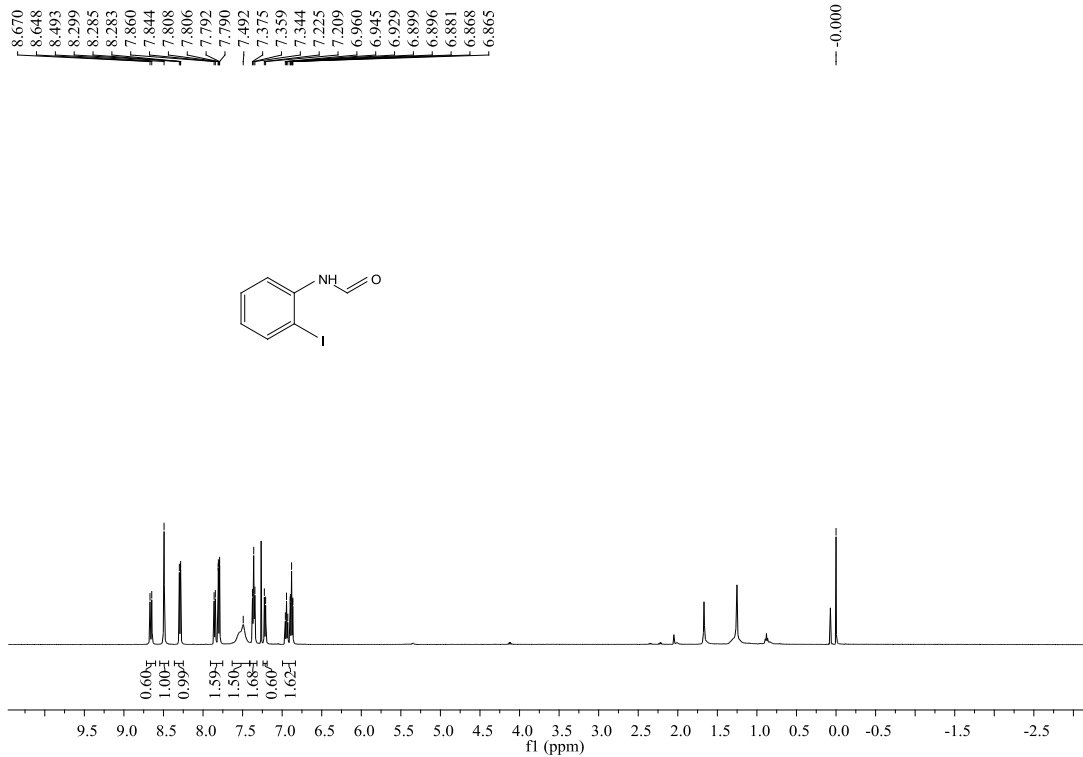

$^1\text{H NMR}$ : *N*-(2-iodophenyl)formamide (2q)

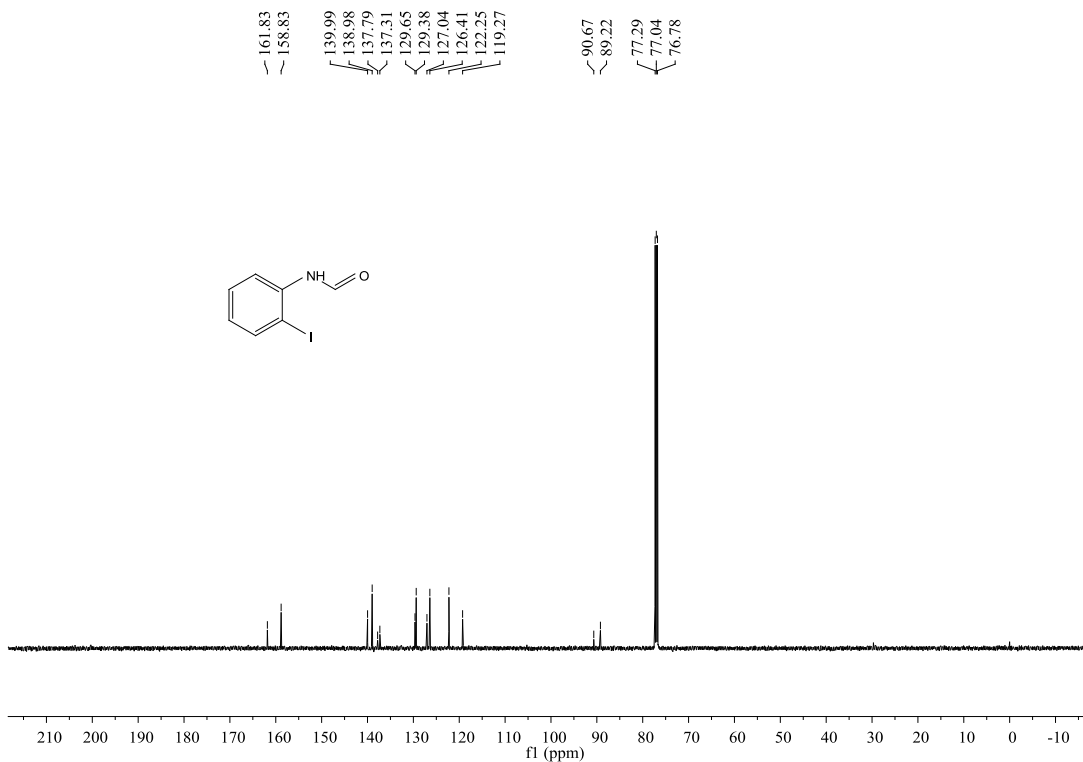

$^{13}\text{C NMR}$ : *N*-(2-iodophenyl)formamide (2q)



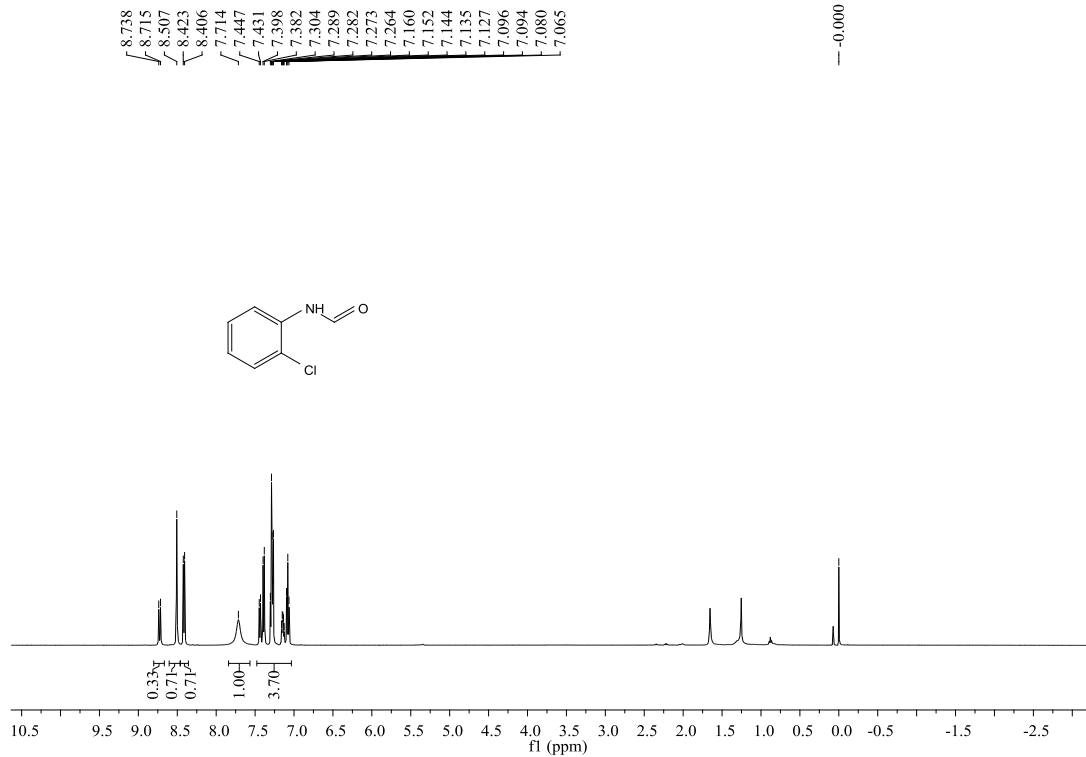

$^1\text{H}$  NMR: *N*-(2-chlorophenyl)formamide (2r)

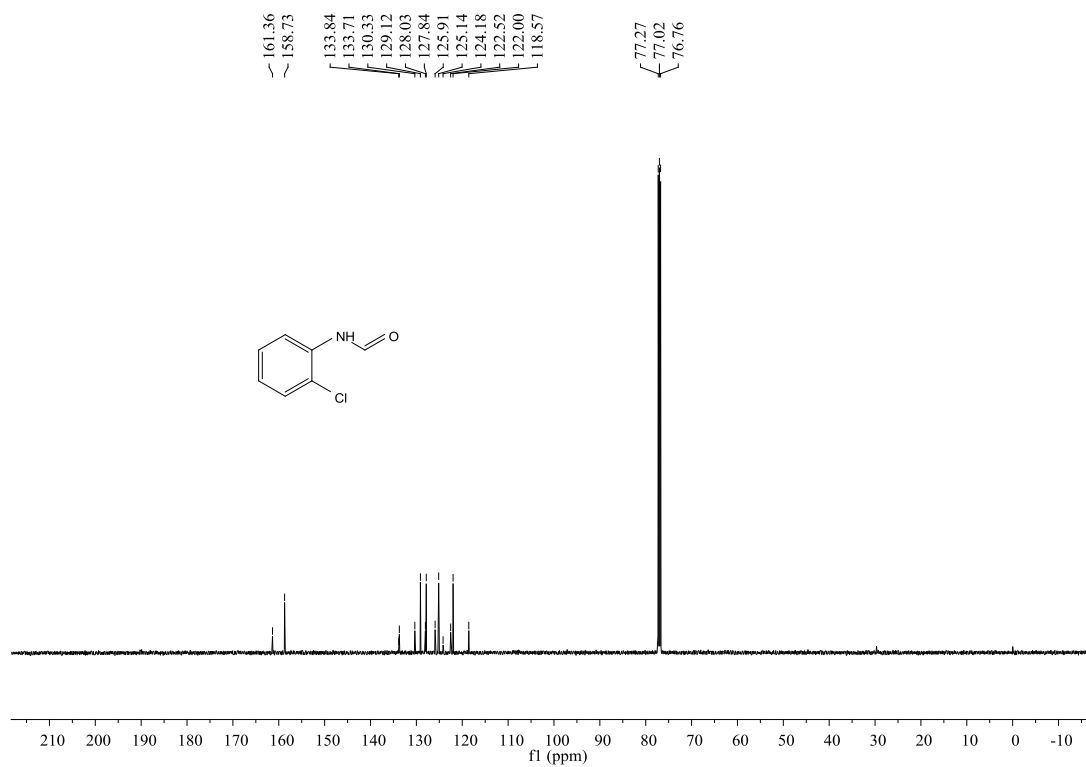

$^{13}\text{C}$  NMR: *N*-(2-chlorophenyl)formamide (2r)

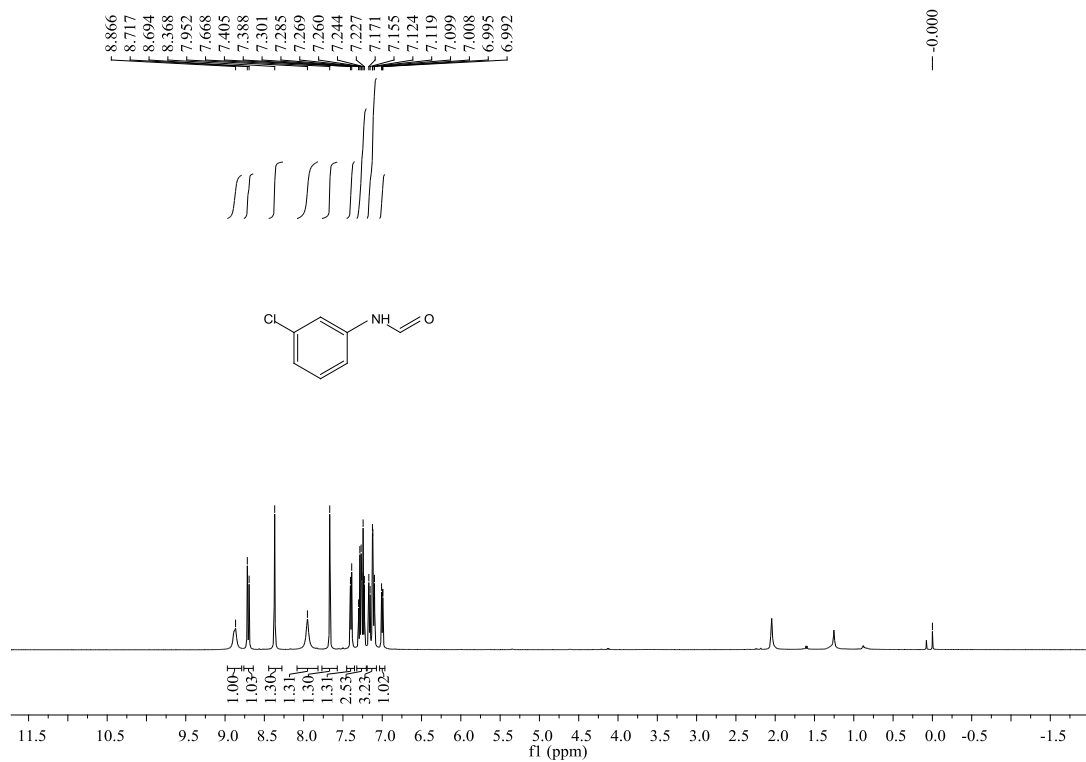

<sup>1</sup>H NMR: *N*-(3-chlorophenyl)formamide (**2s**)

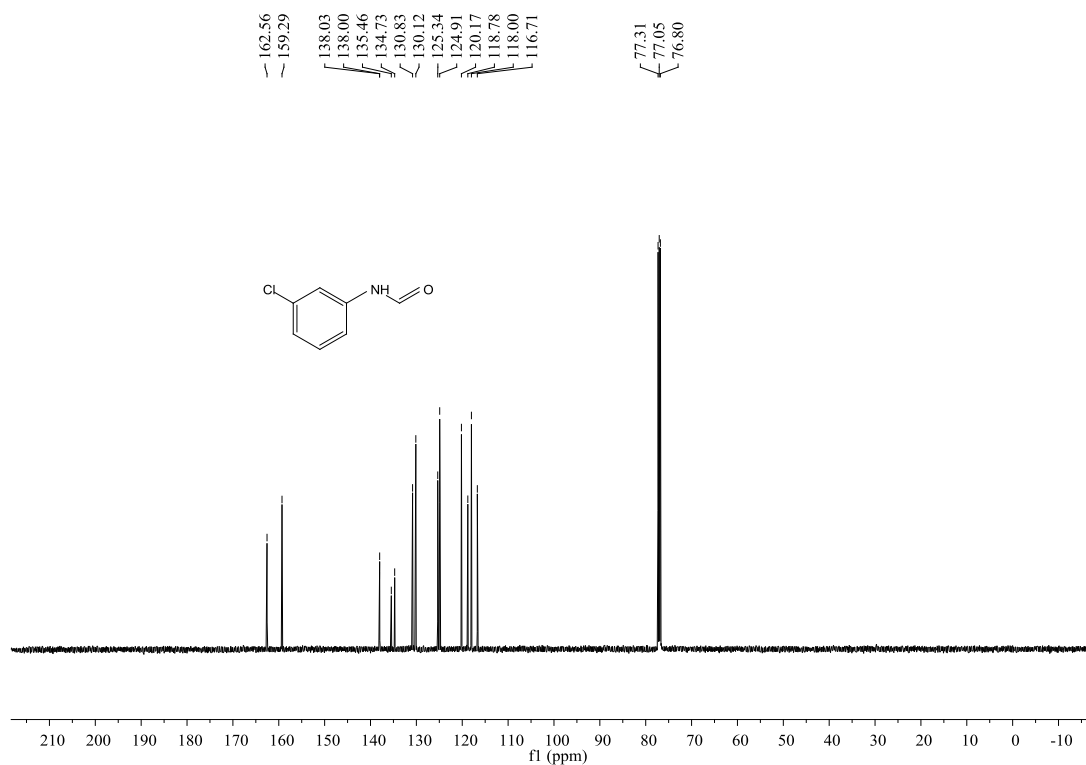

<sup>13</sup>C NMR: *N*-(3-chlorophenyl)formamide (**2s**)

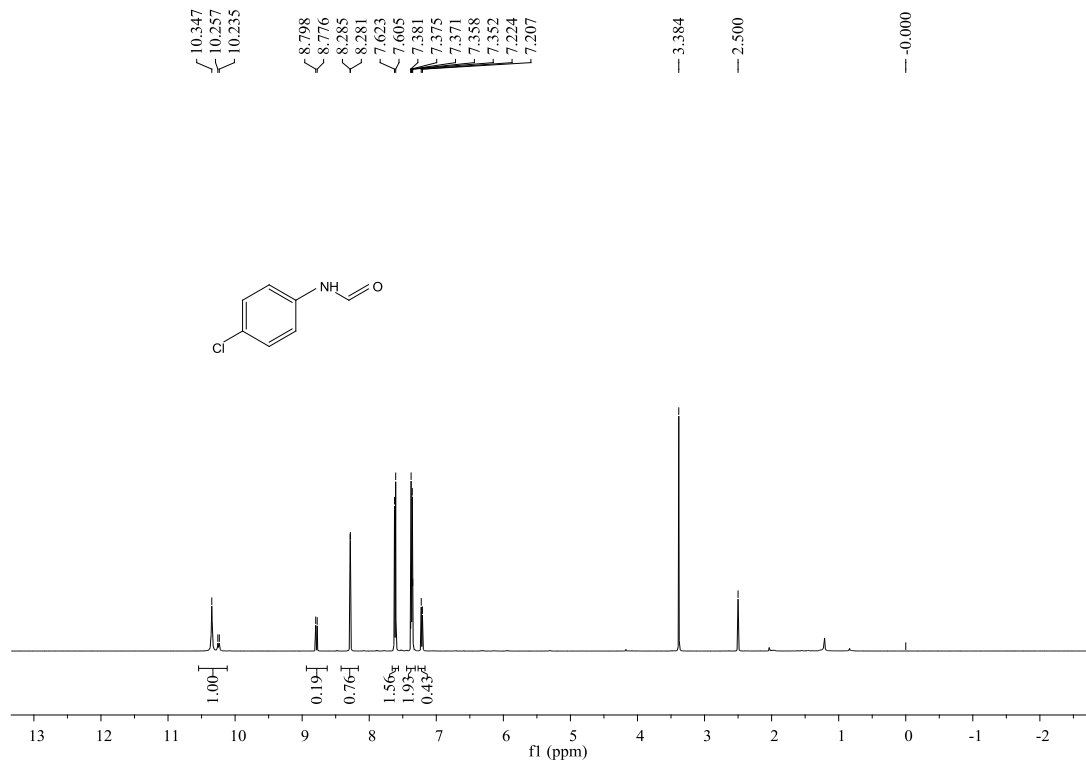

<sup>1</sup>H NMR: *N*-(4-chlorophenyl)formamide (2t)

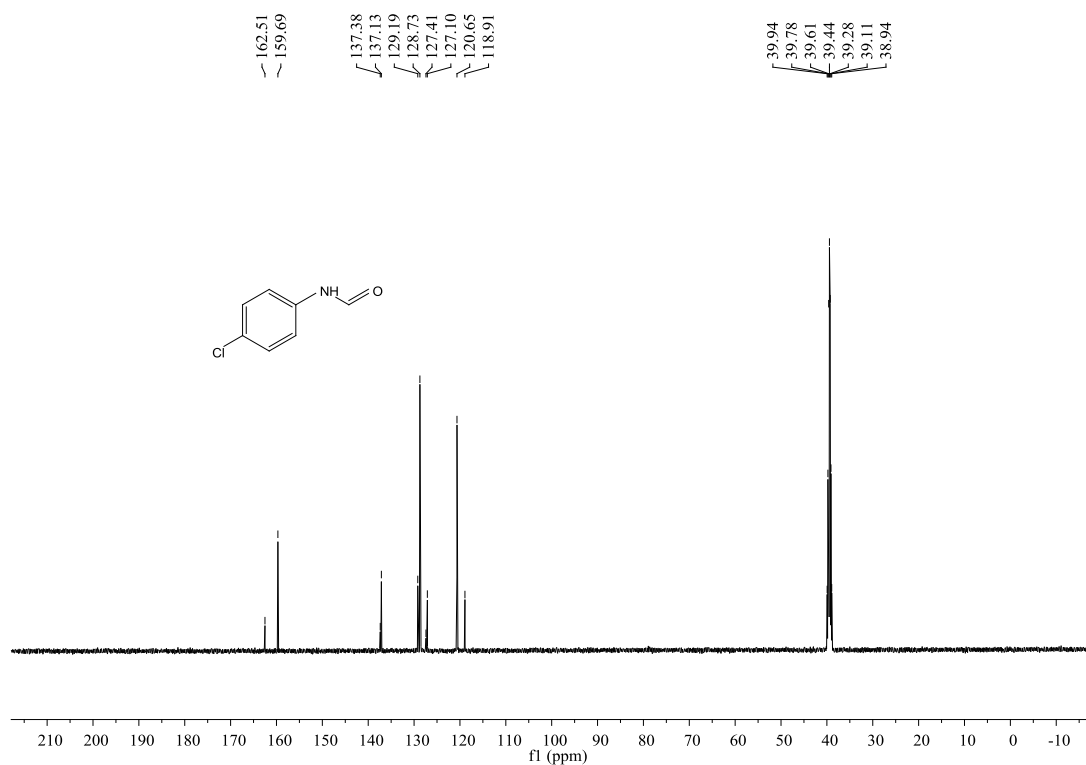

<sup>13</sup>C NMR: *N*-(4-chlorophenyl)formamide (2t)

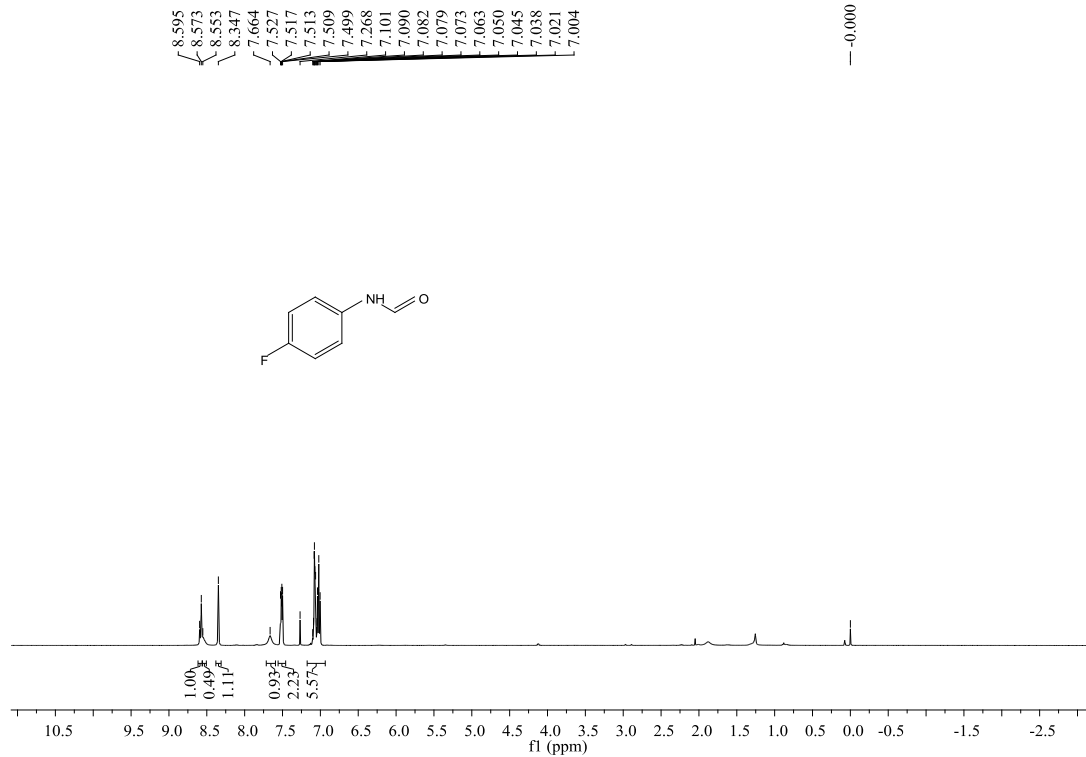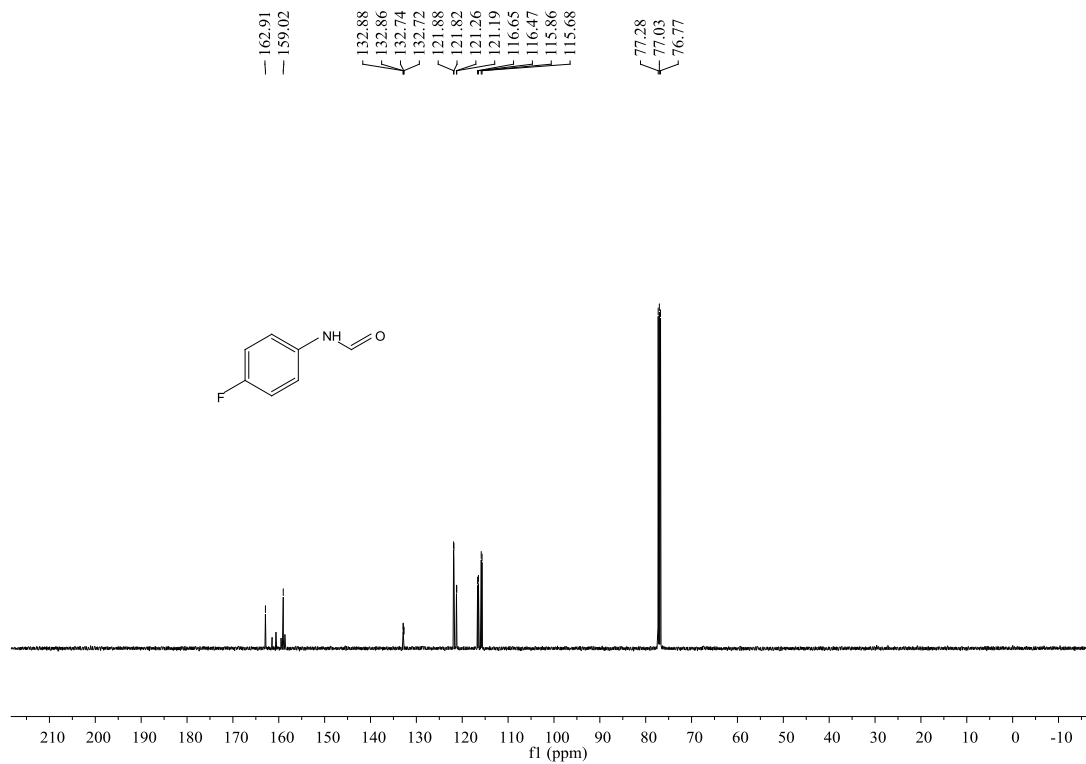

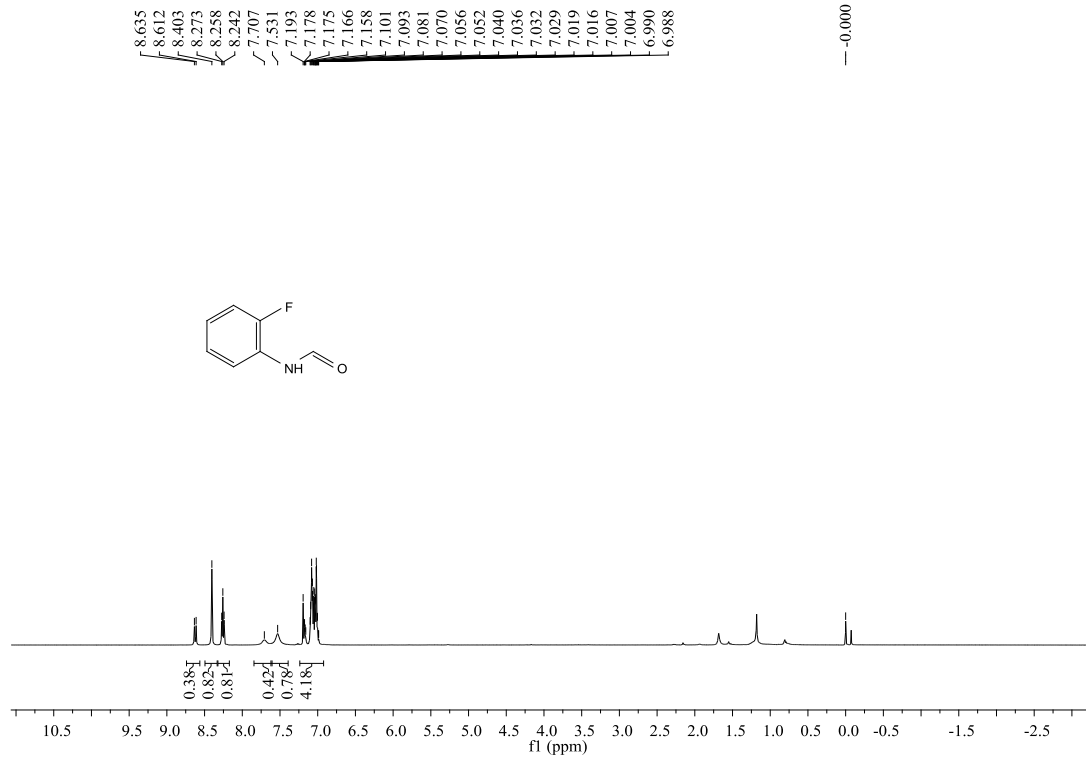

<sup>1</sup>H NMR: *N*-(2-fluorophenyl)formamide (**2v**)

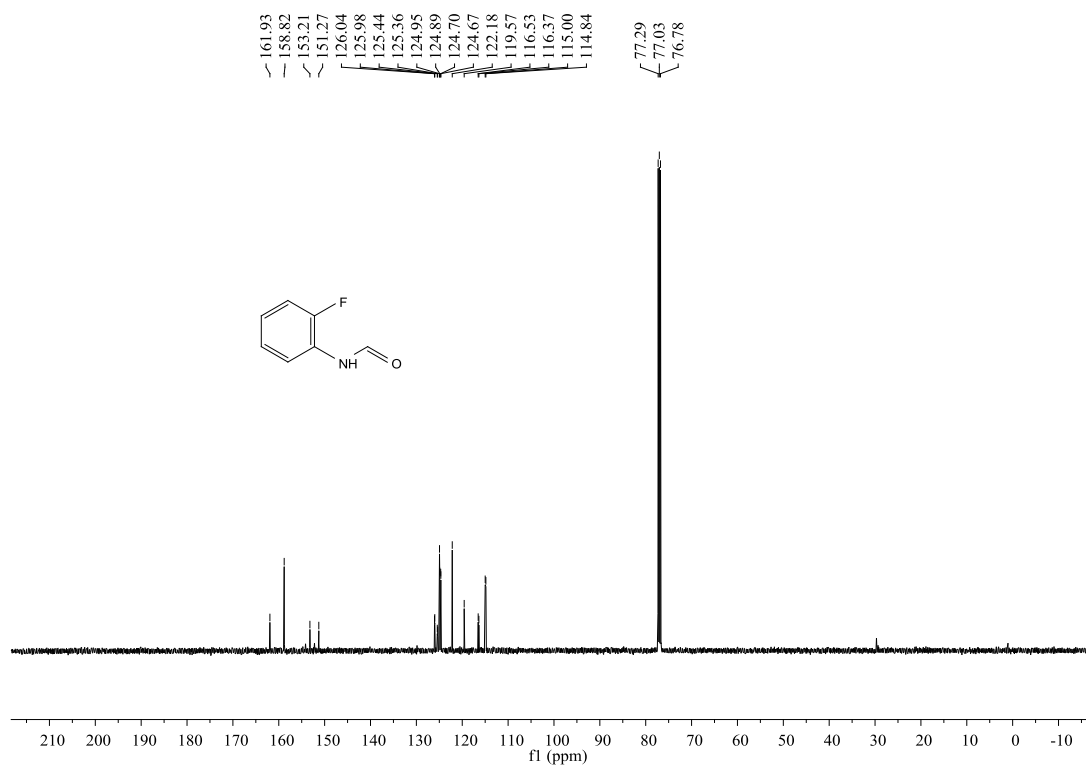

<sup>13</sup>C NMR: *N*-(2-fluorophenyl)formamide (**2v**)

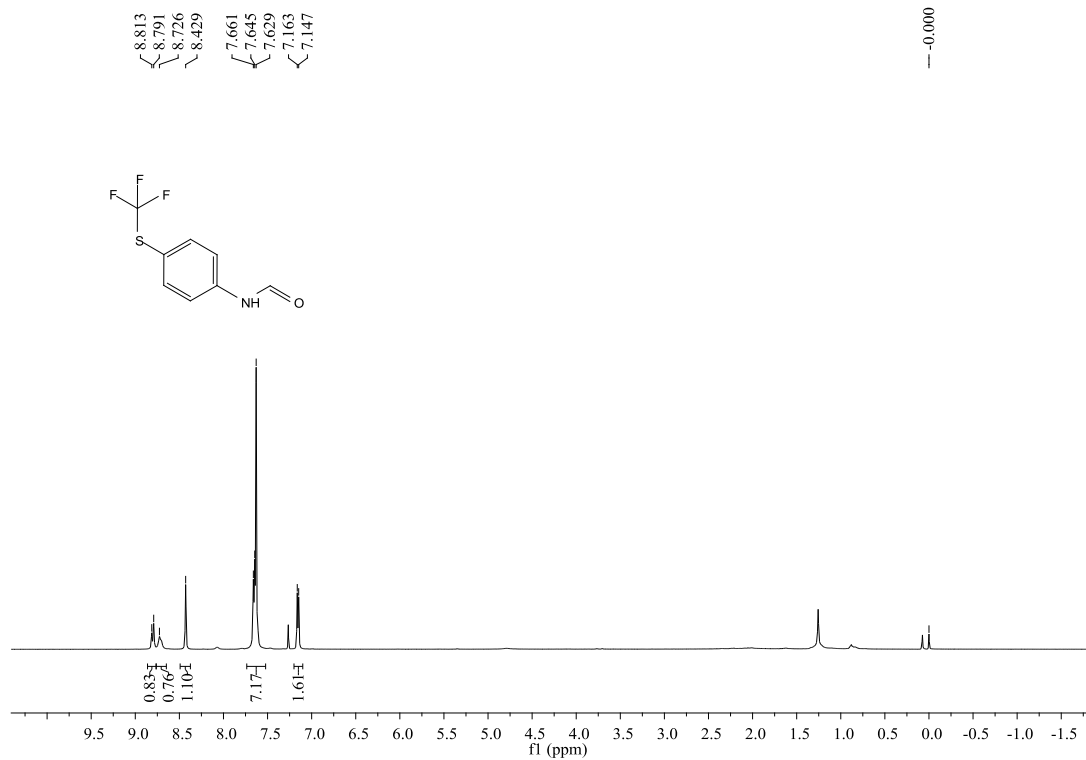

<sup>1</sup>H NMR: *N*-(4-((trifluoromethyl)thio)phenyl)formamide (**2w**)

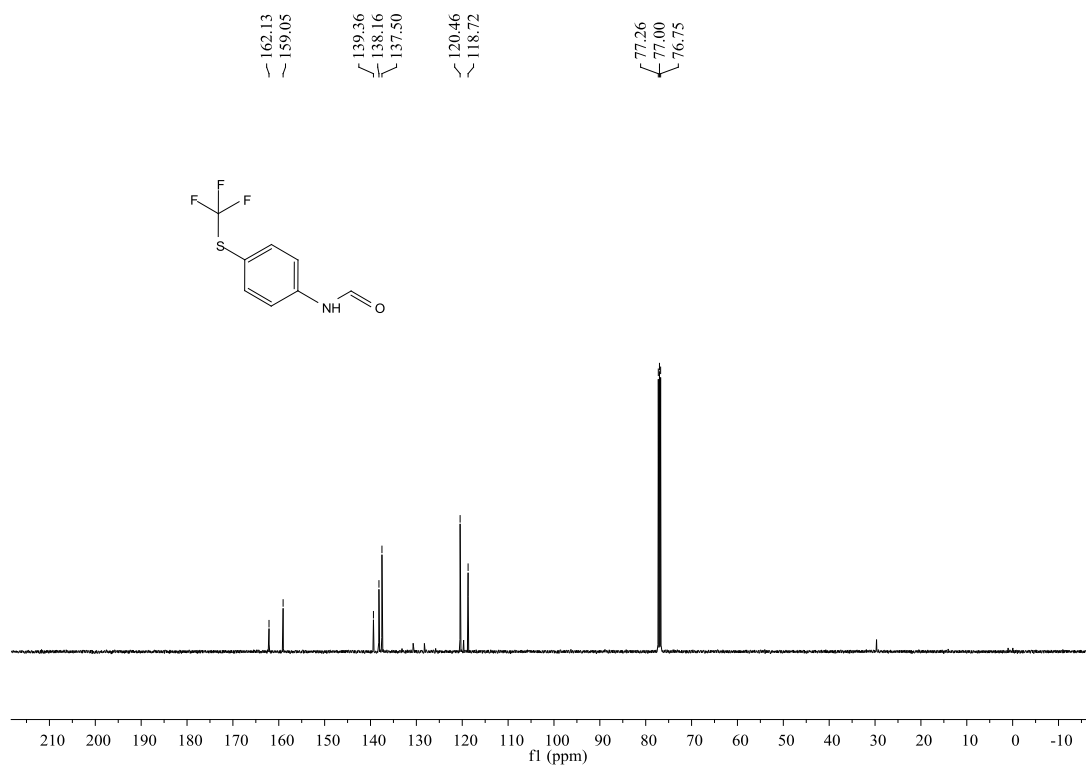

<sup>13</sup>C NMR: *N*-(4-((trifluoromethyl)thio)phenyl)formamide (**2w**)

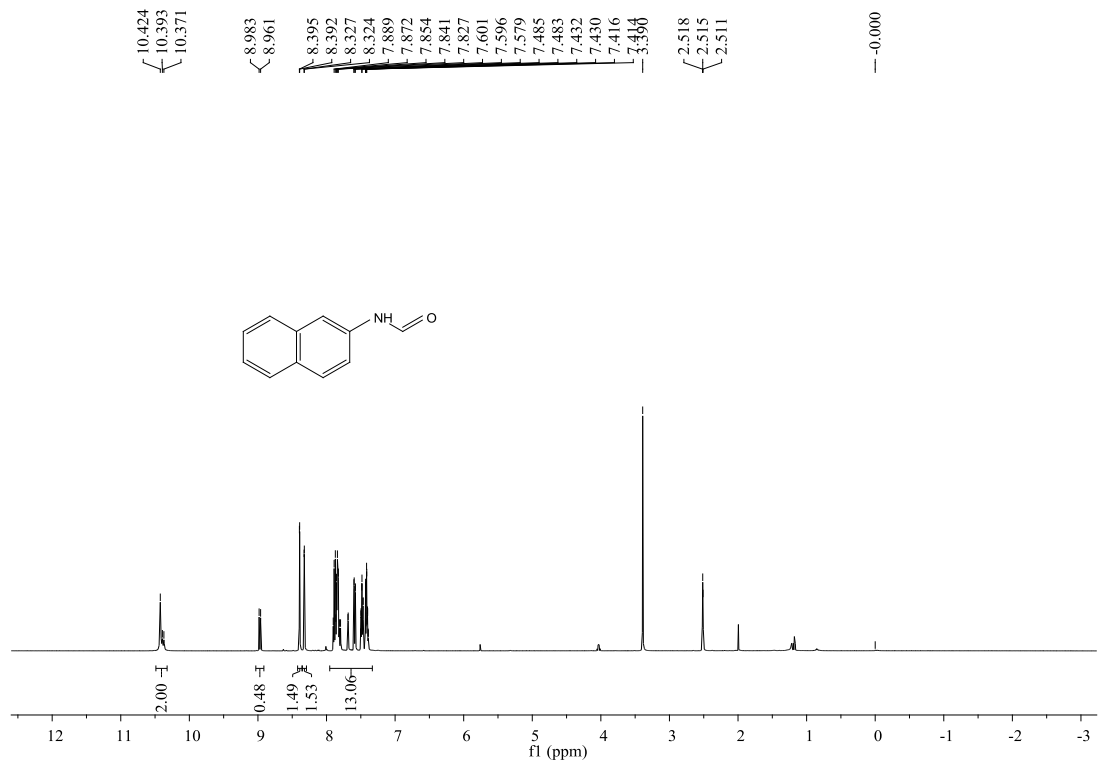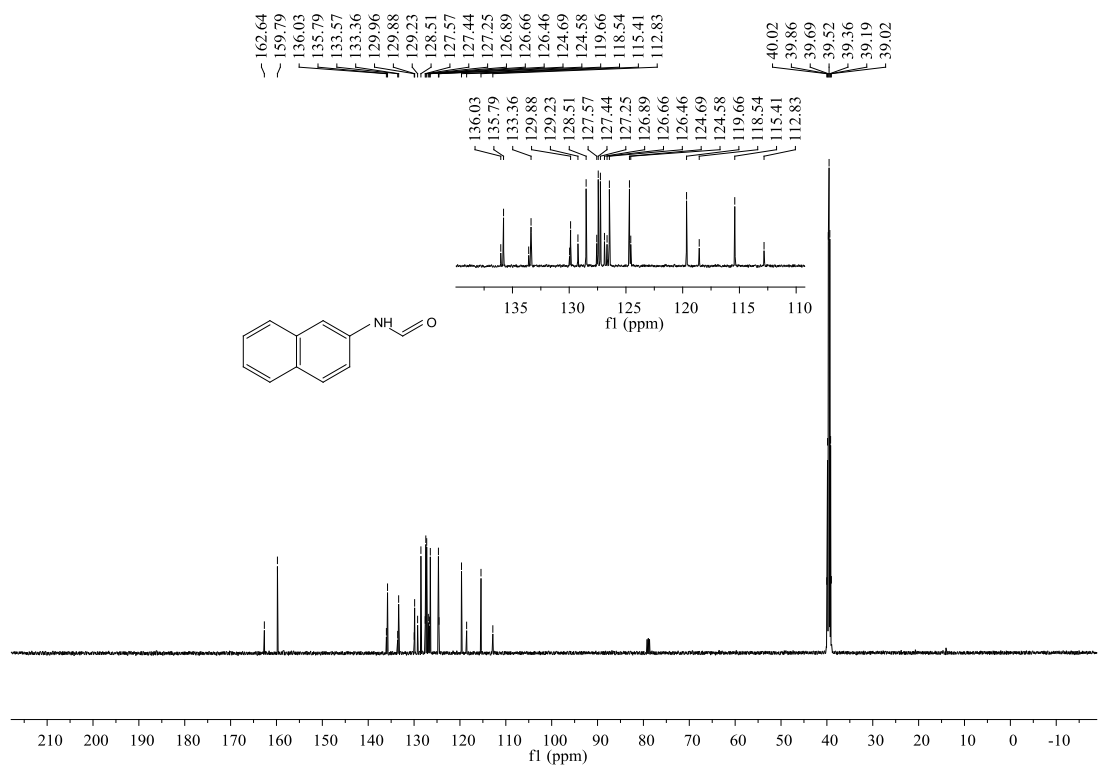

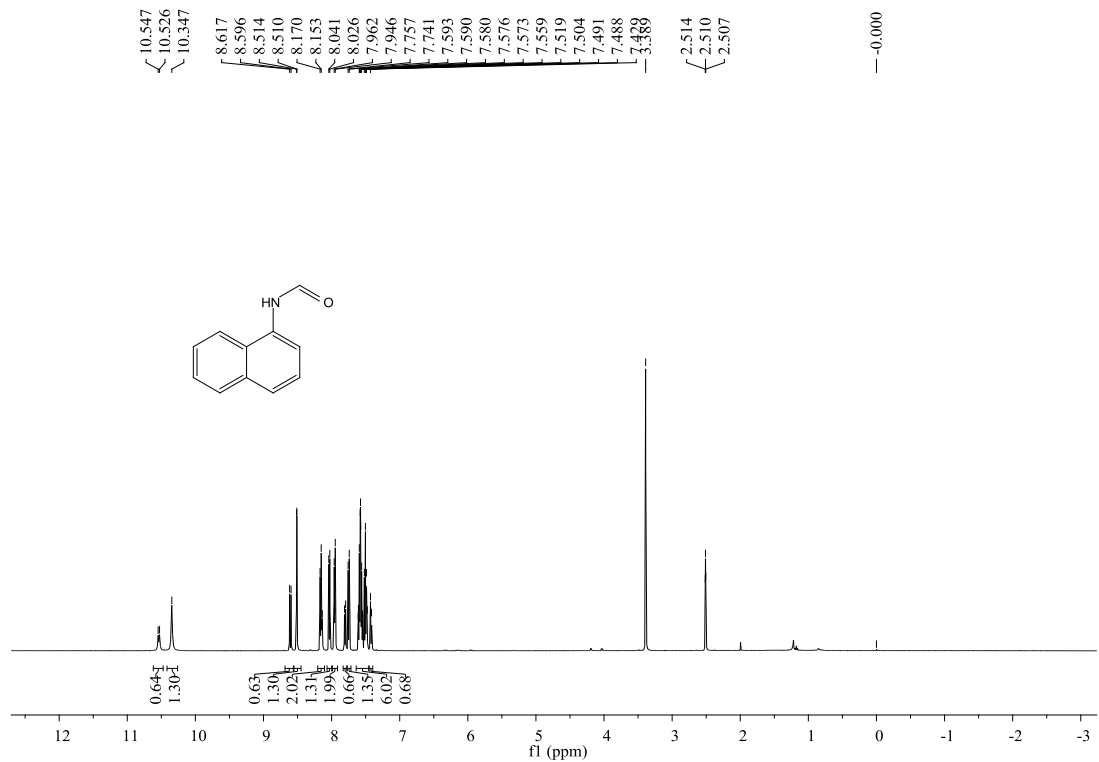

<sup>1</sup>H NMR: *N*-(naphthalene-1-yl)formamide (2y)

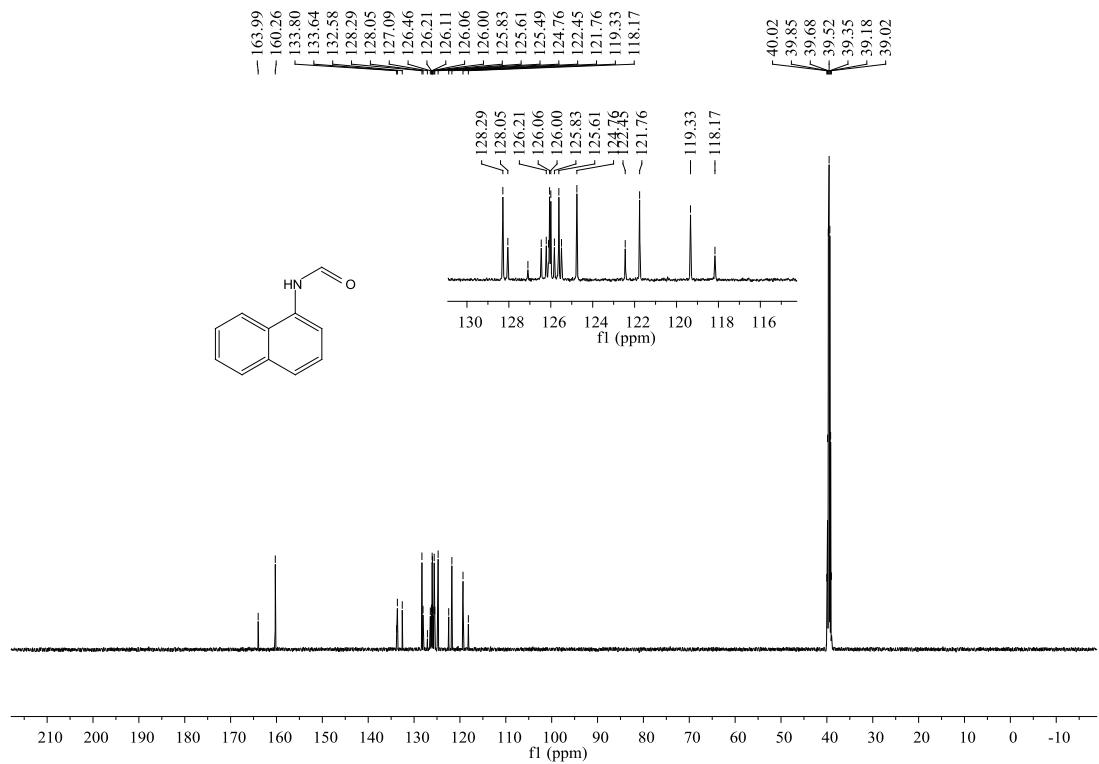

<sup>13</sup>C NMR: *N*-(naphthalene-1-yl)formamide (2y)



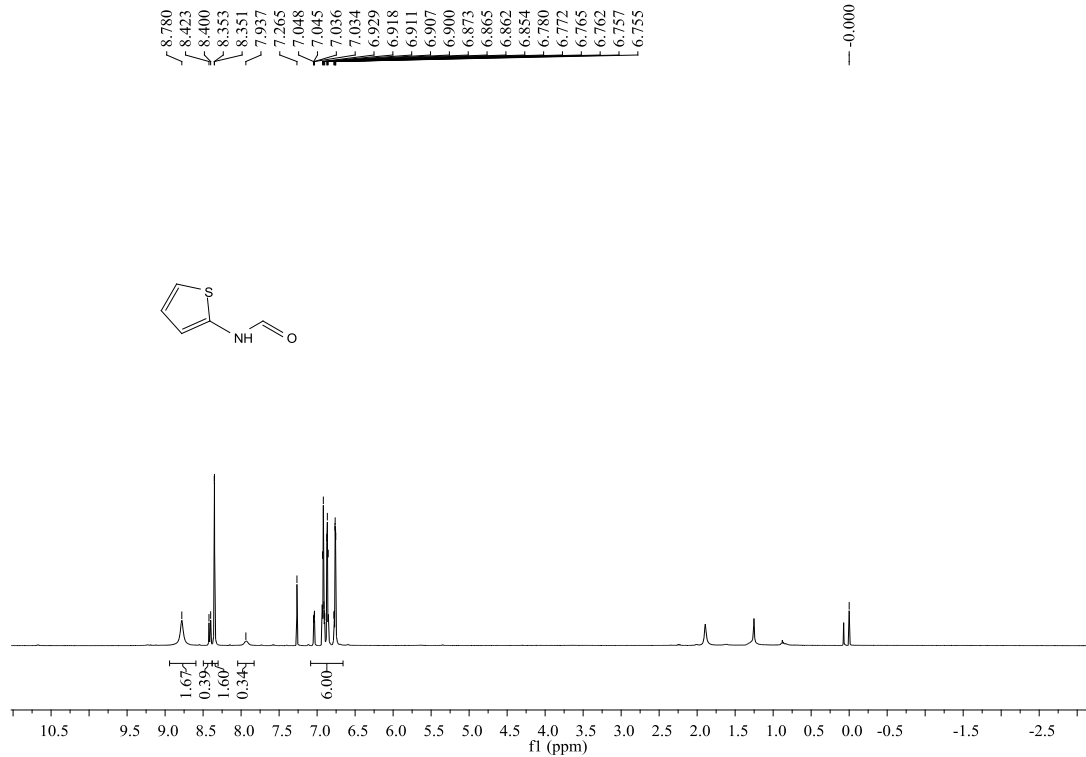

<sup>1</sup>H NMR: *N*-(thiophen-2-yl)formamide (**2z**)

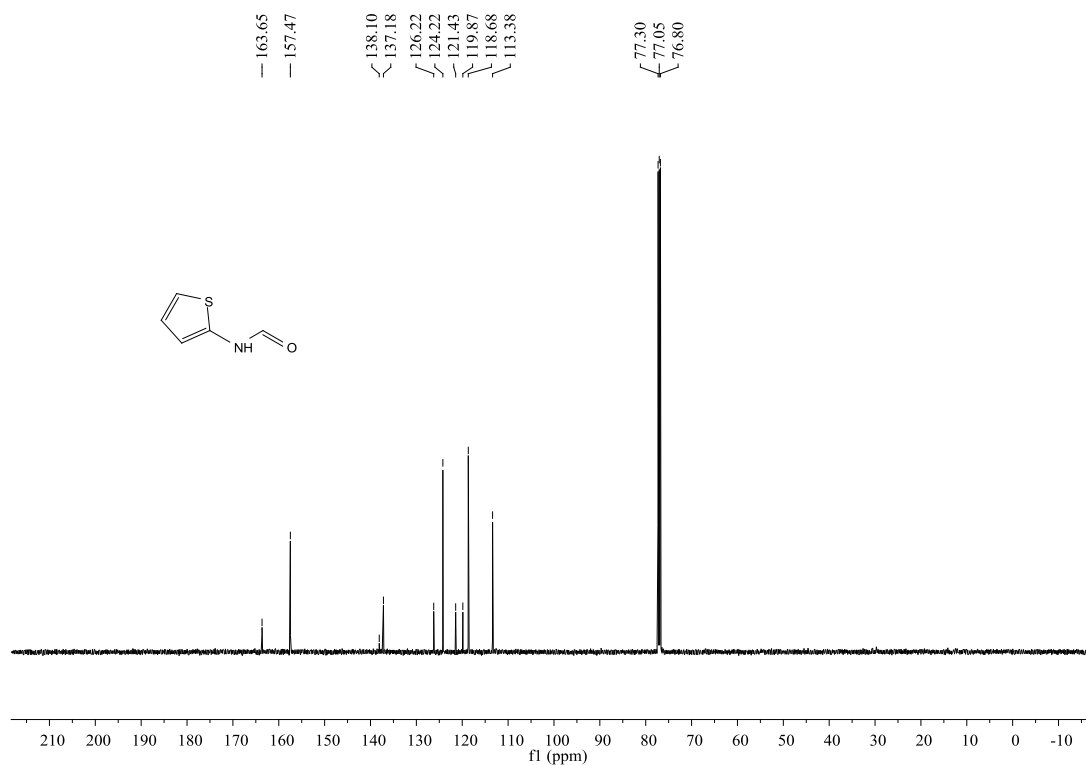

<sup>13</sup>C NMR: *N*-(thiophen-2-yl)formamide (**2z**)

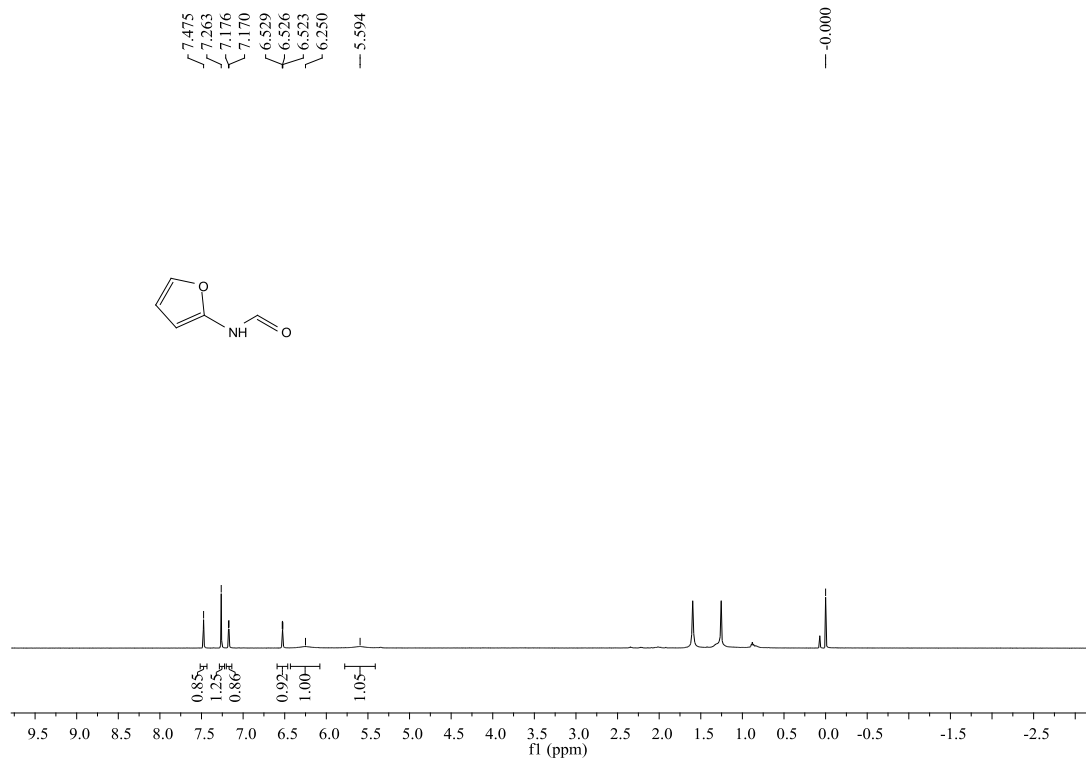

<sup>1</sup>H NMR: *N*-(furan-2-yl)formamide (**2a'**)

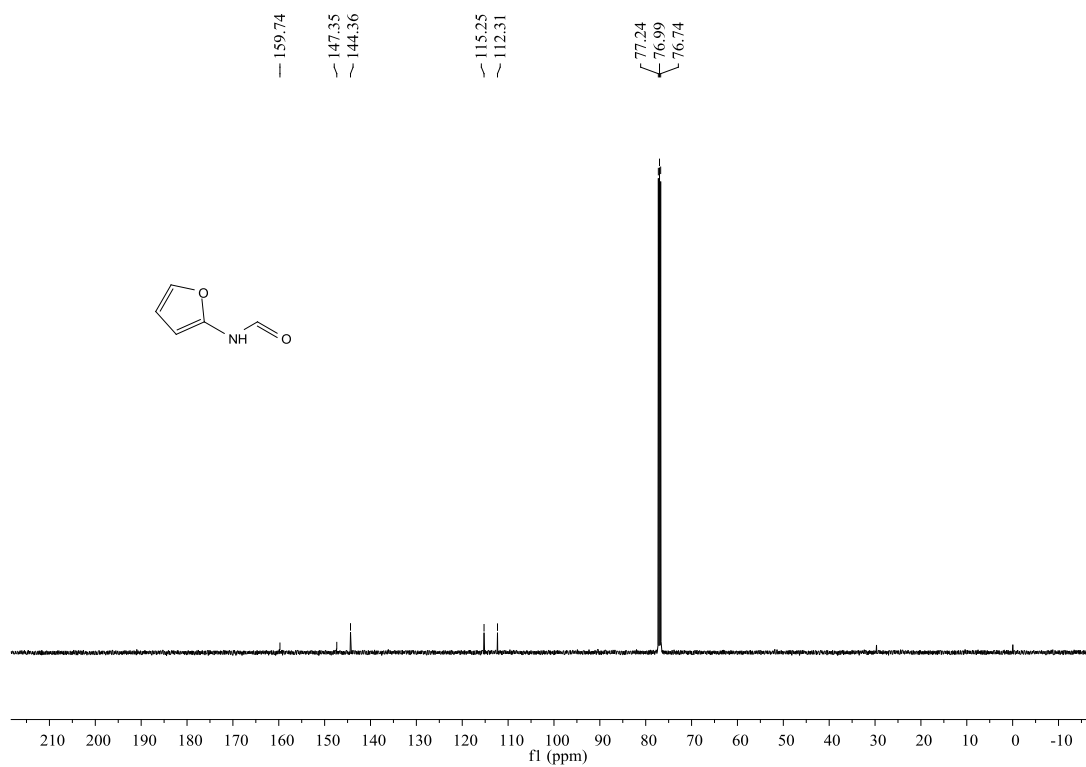

<sup>13</sup>C NMR: *N*-(furan-2-yl)formamide (**2a'**)

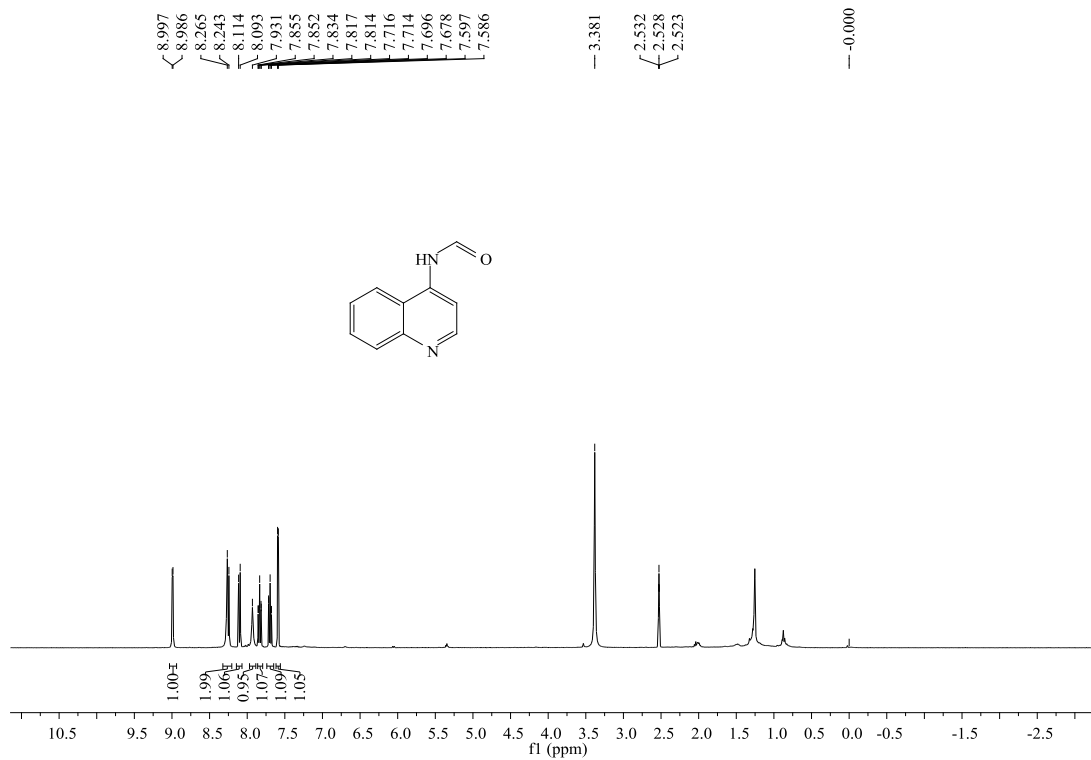

<sup>1</sup>H NMR: *N*-(quinolin-4-yl)formamide (2b')

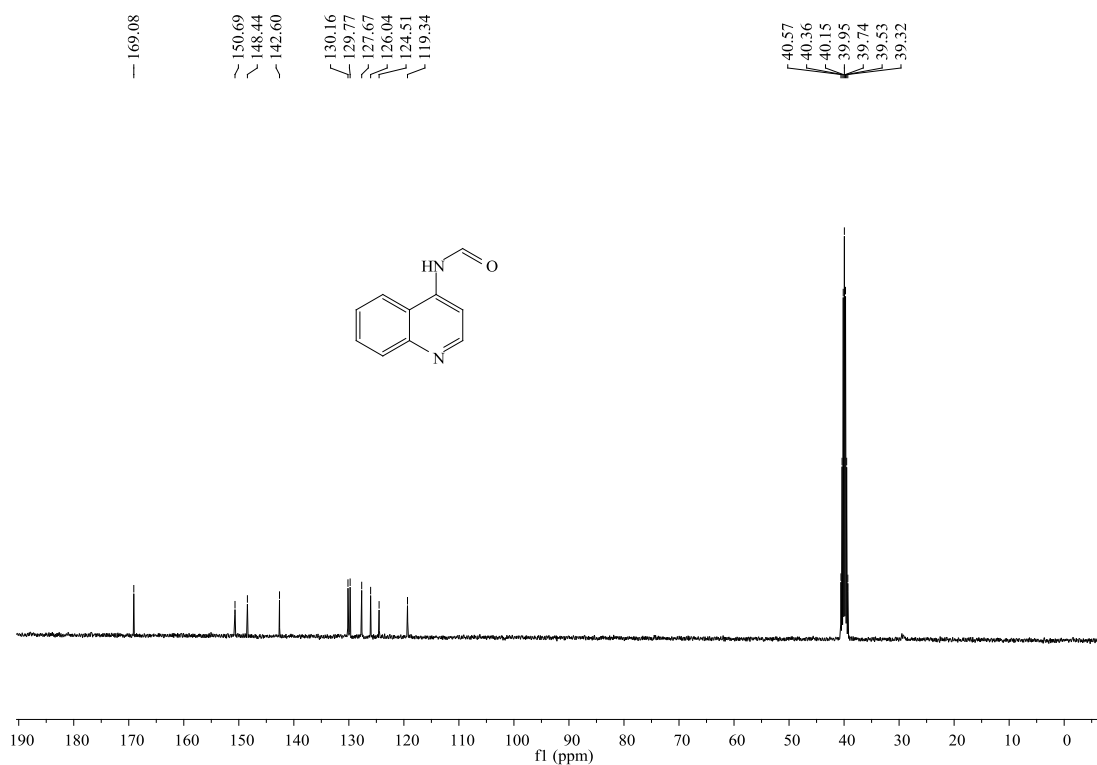

<sup>13</sup>C NMR: *N*-(quinolin-4-yl)formamide (2b')

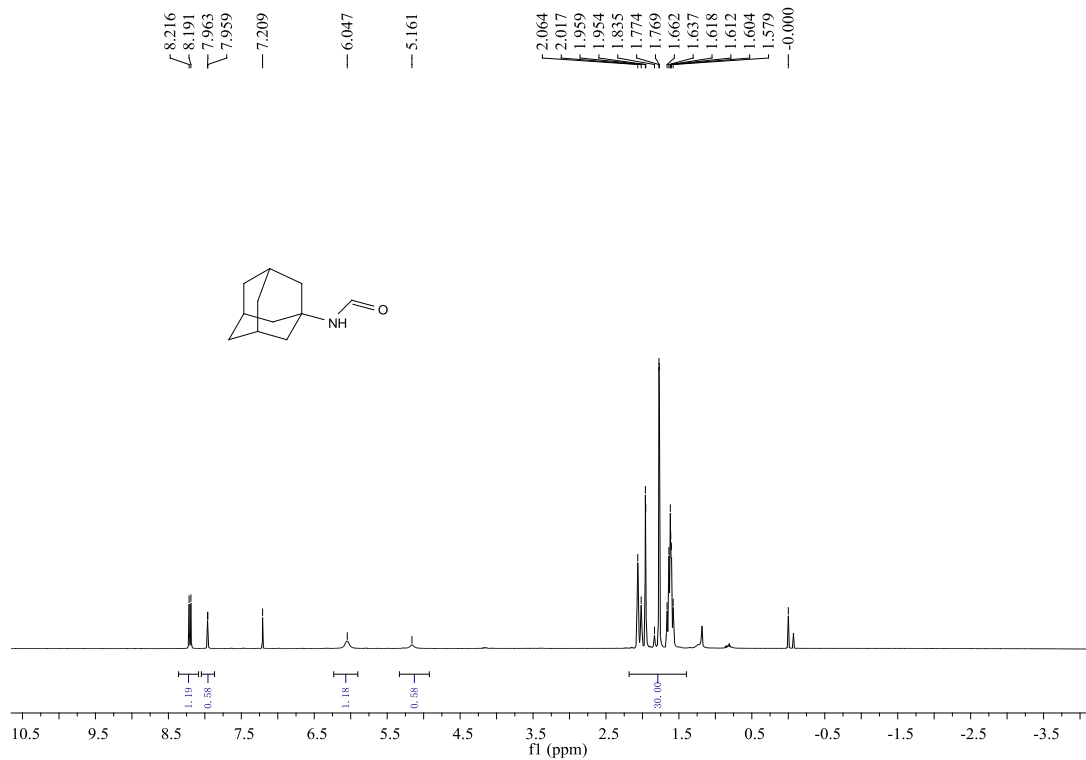

<sup>1</sup>H NMR: *N*-adamantylformamide (**2c'**)

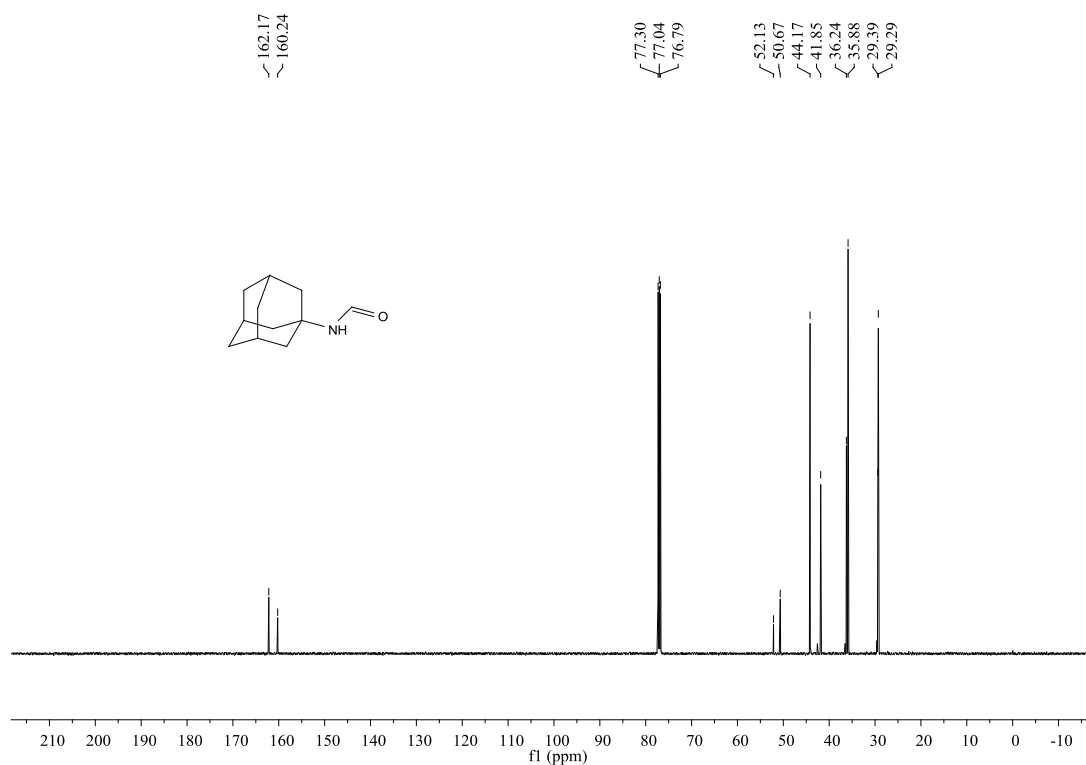

<sup>13</sup>C NMR: *N*-adamantylformamide (**2c'**)

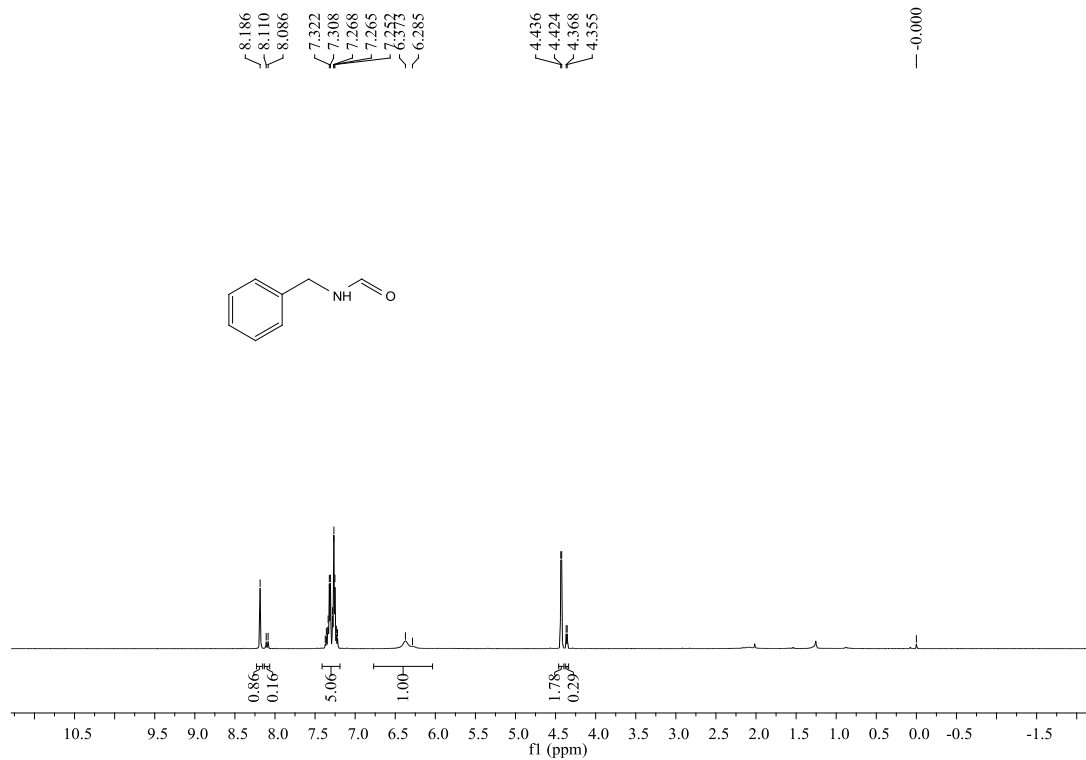

<sup>1</sup>H NMR: *N*-benzylformamide (2d') (from 1d')

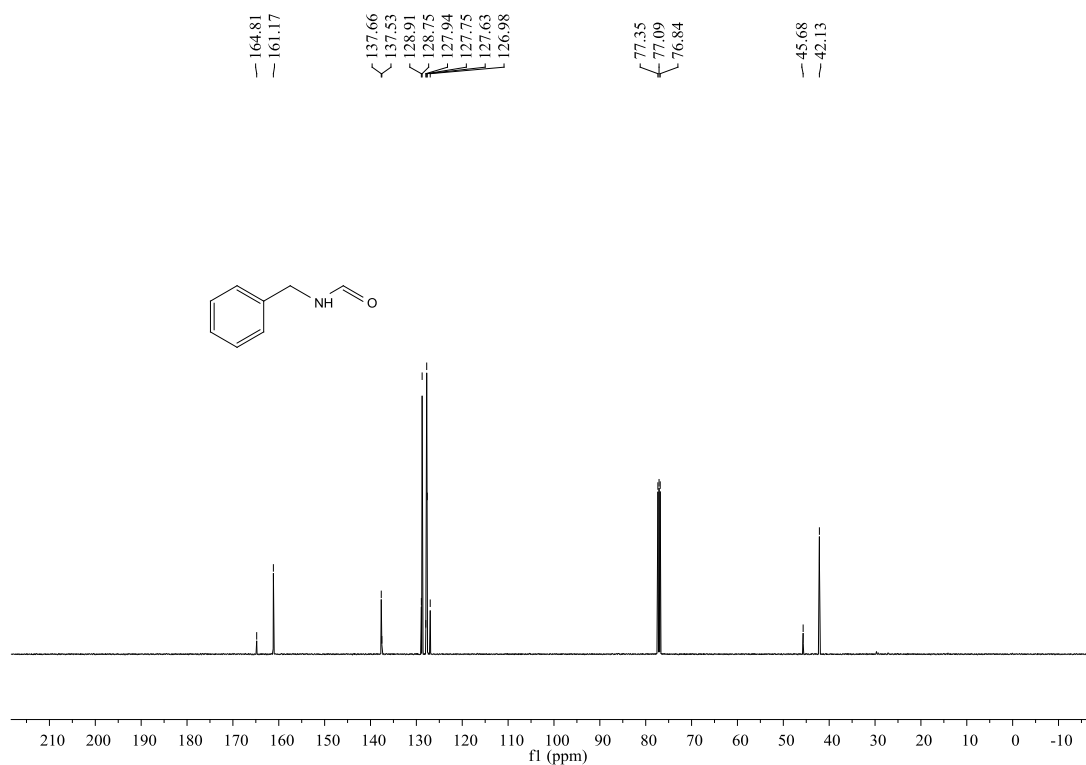

<sup>13</sup>C NMR: *N*-benzylformamide (2d') (from 1d')

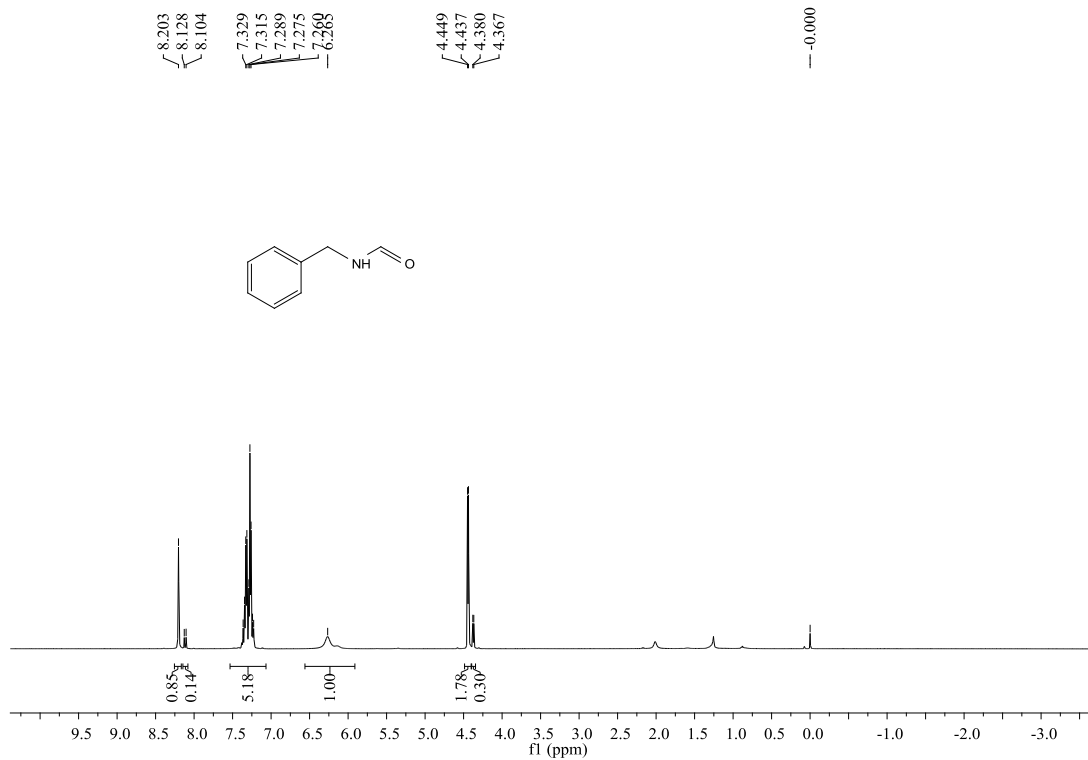

<sup>1</sup>H NMR: *N*-benzylformamide (2d') (from 4d')

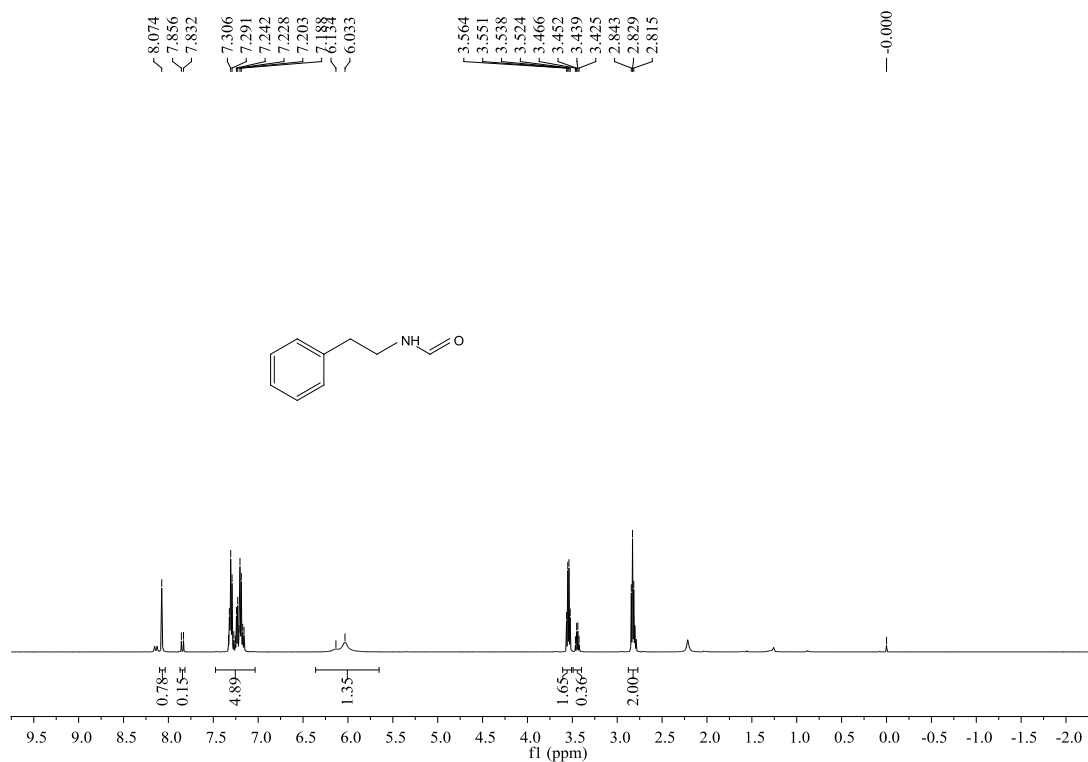

<sup>1</sup>H NMR: *N*-phenethylformamide (2e') (from 1e')

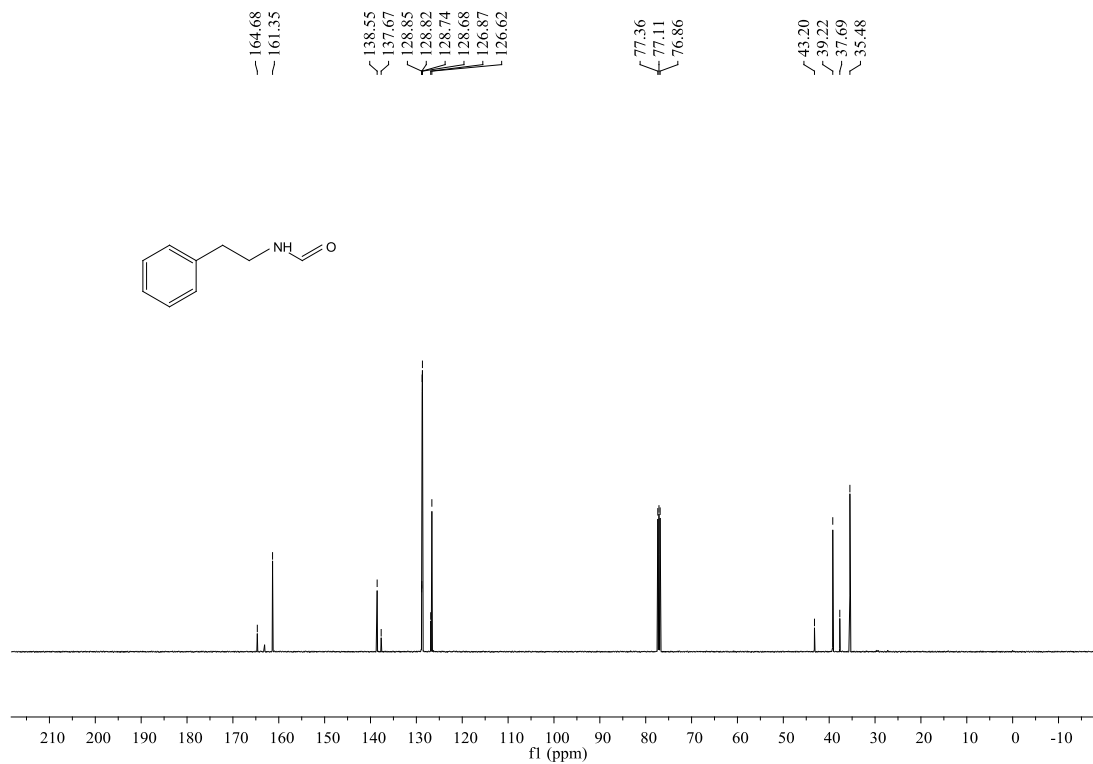

<sup>13</sup>C NMR: *N*-phenethylformamide (**2e'**) (from **1e'**)

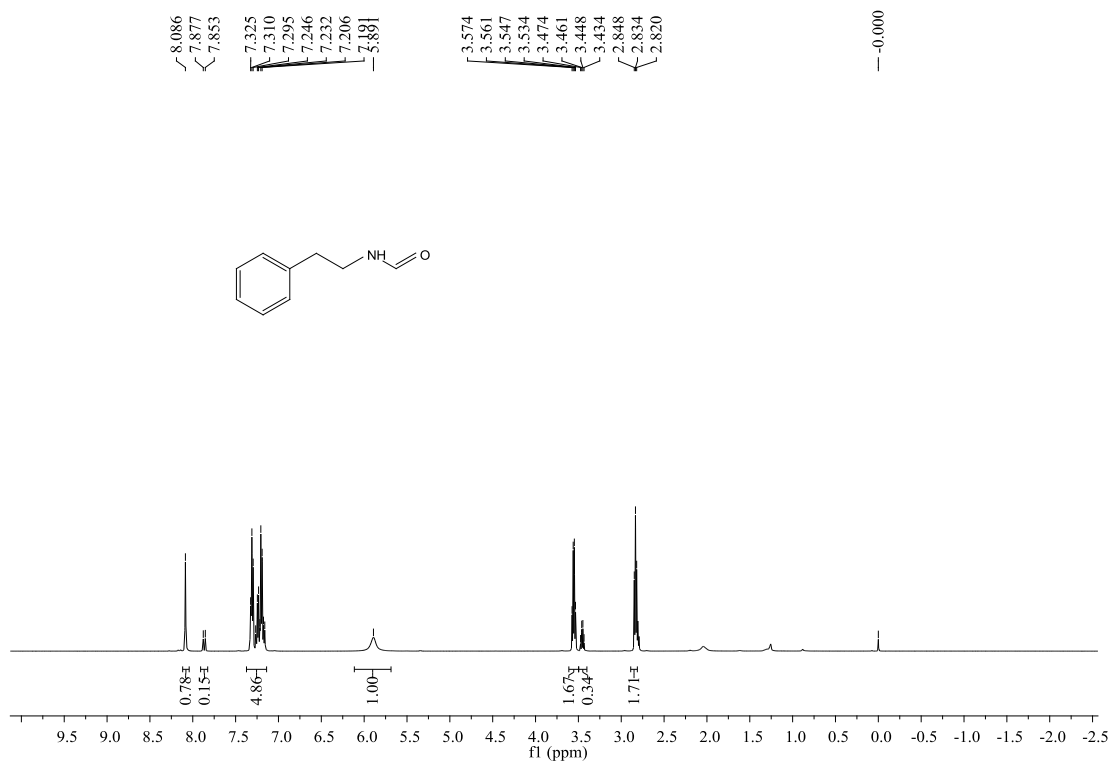

<sup>1</sup>H NMR: *N*-phenethylformamide (**2e'**) (from **4e'**)

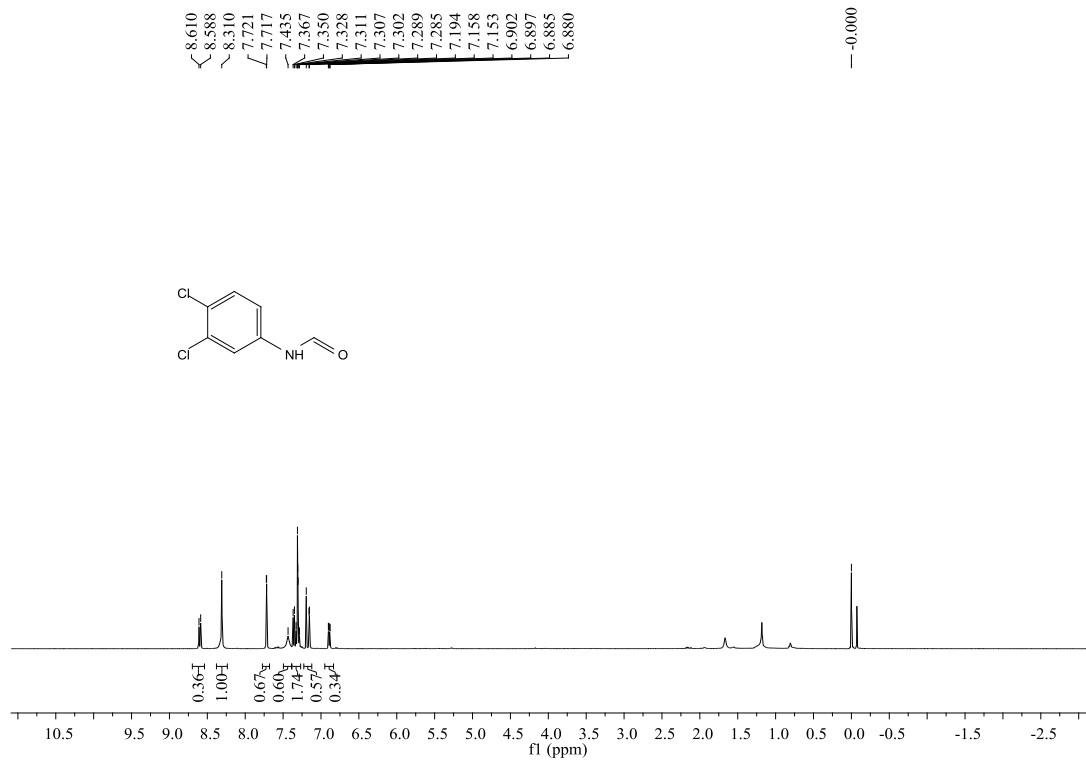

<sup>1</sup>H NMR: *N*-(3,4-dichlorophenyl)formamide (**2g'**)

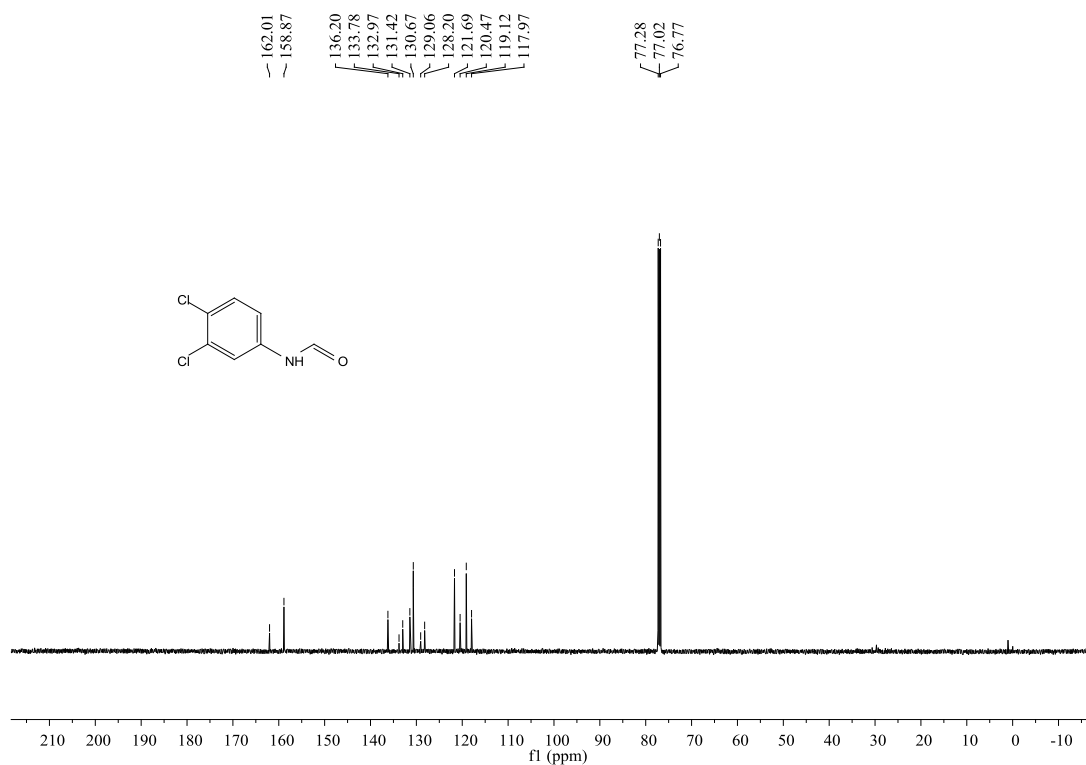

<sup>13</sup>C NMR: *N*-(3,4-dichlorophenyl)formamide (**2g'**)



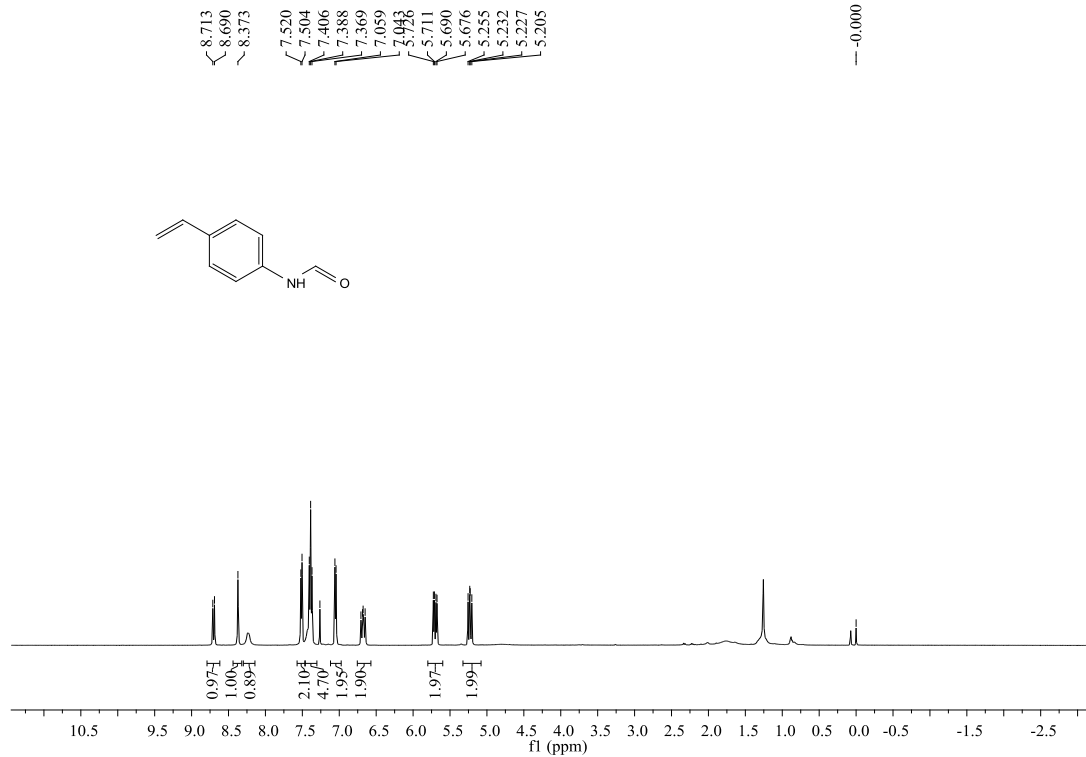

<sup>1</sup>H NMR: *N*-(4-vinylphenyl)formamide (2h')

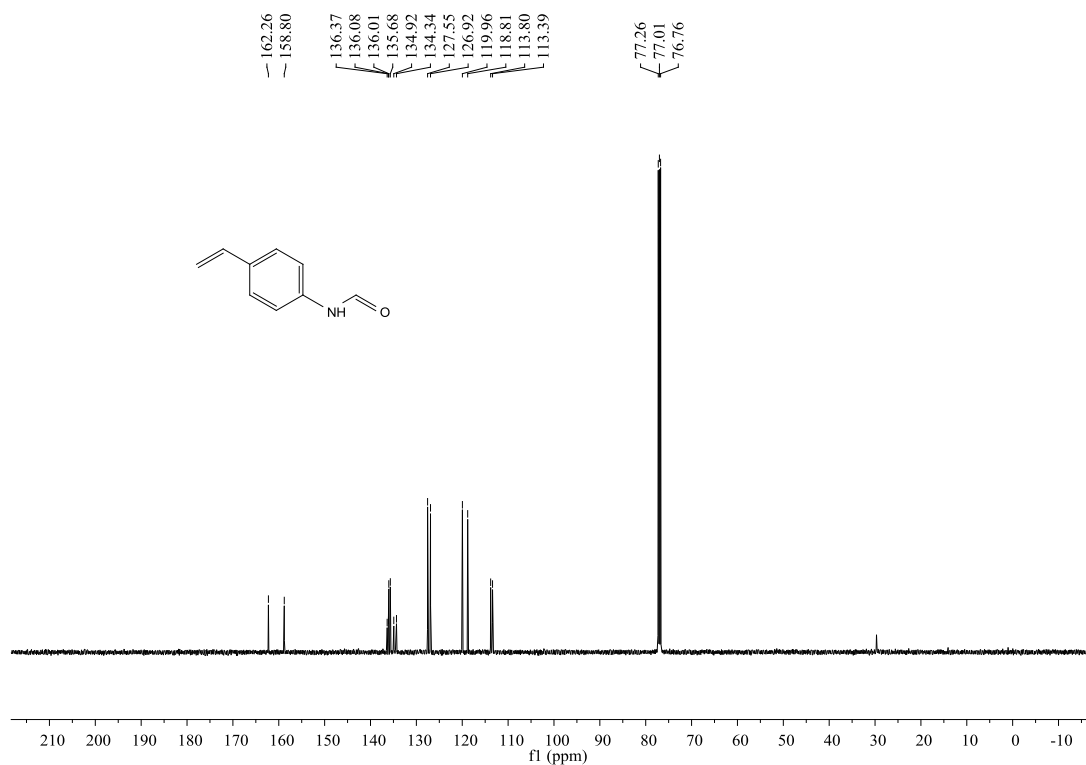

<sup>13</sup>C NMR: *N*-(4-vinylphenyl)formamide (2h')

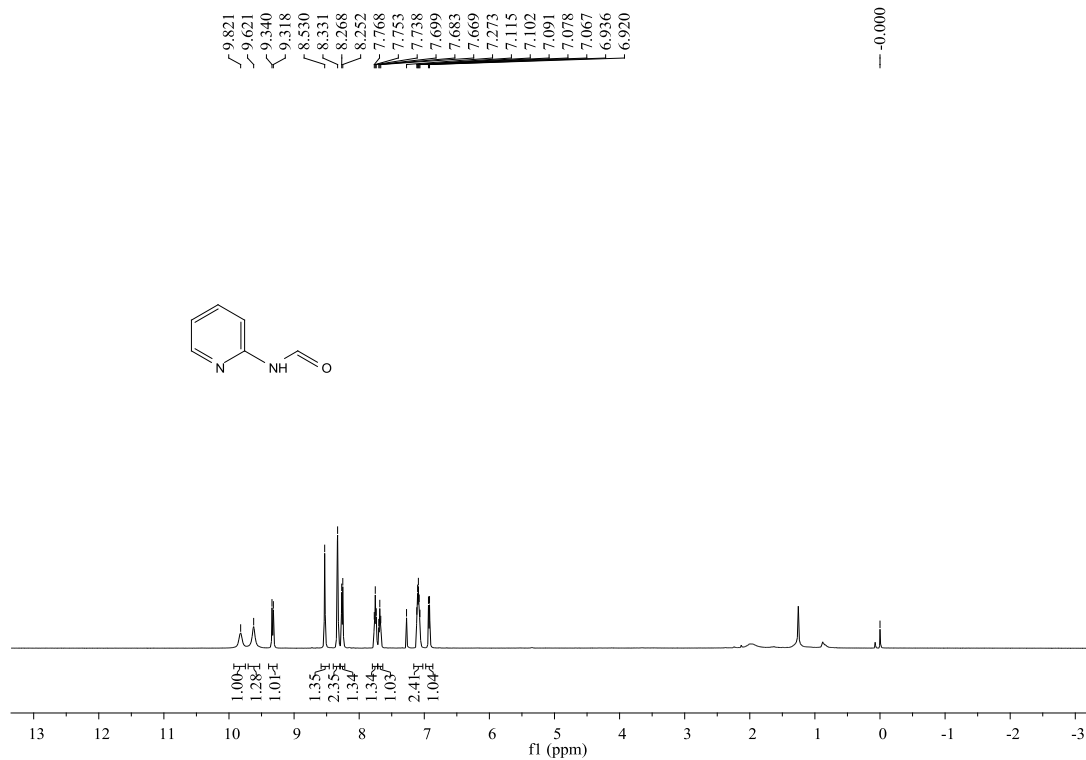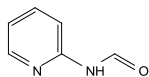

<sup>1</sup>H NMR: *N*-(pyridin-2-yl)formamide (**2i'**)

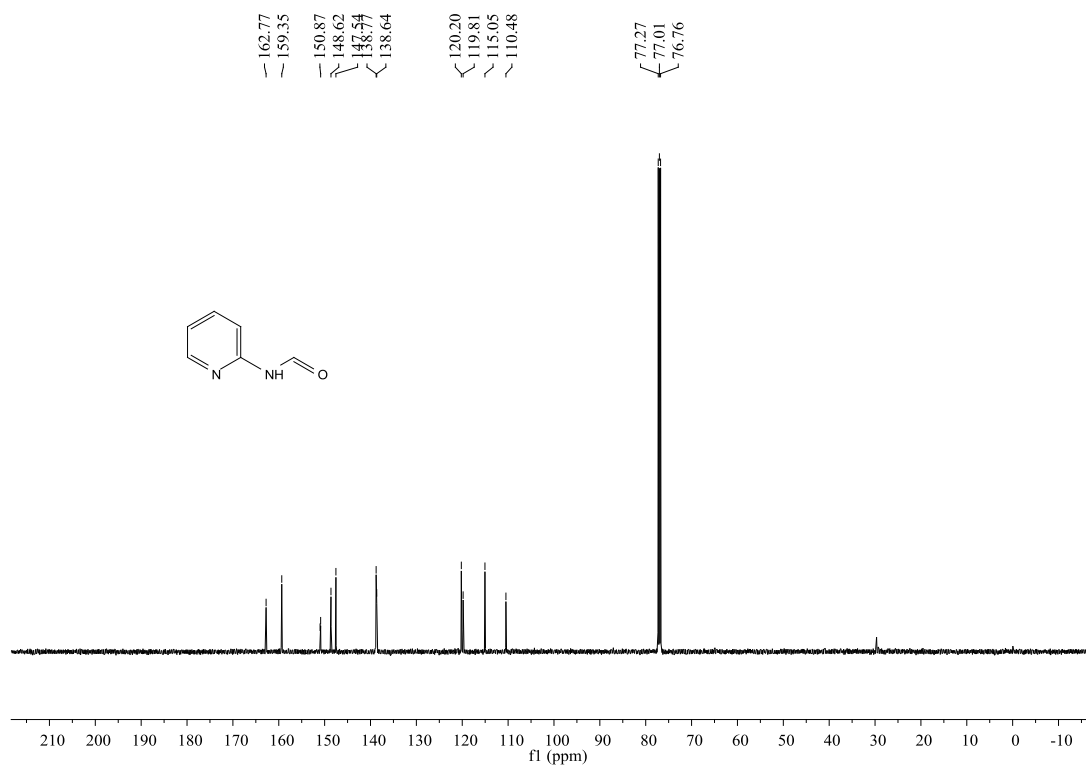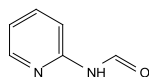

<sup>13</sup>C NMR: *N*-(pyridin-2-yl)formamide (**2i'**)

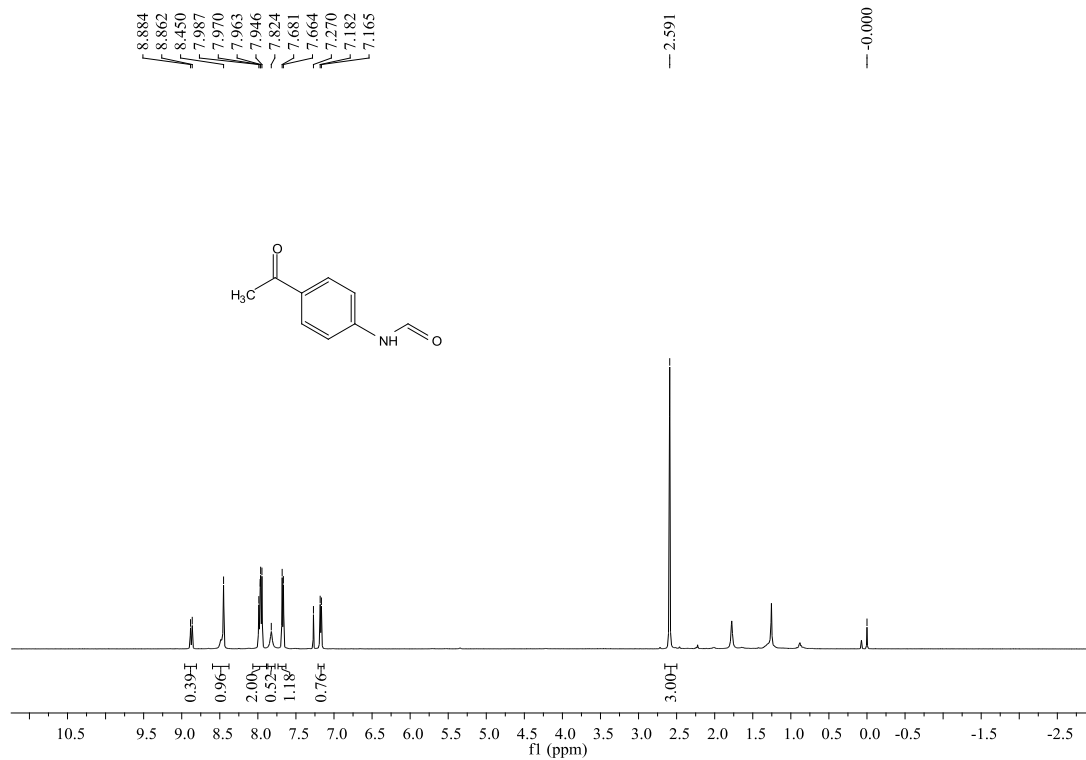

<sup>1</sup>H NMR: *N*-(4-acetylphenyl)formamide (**2j'**)

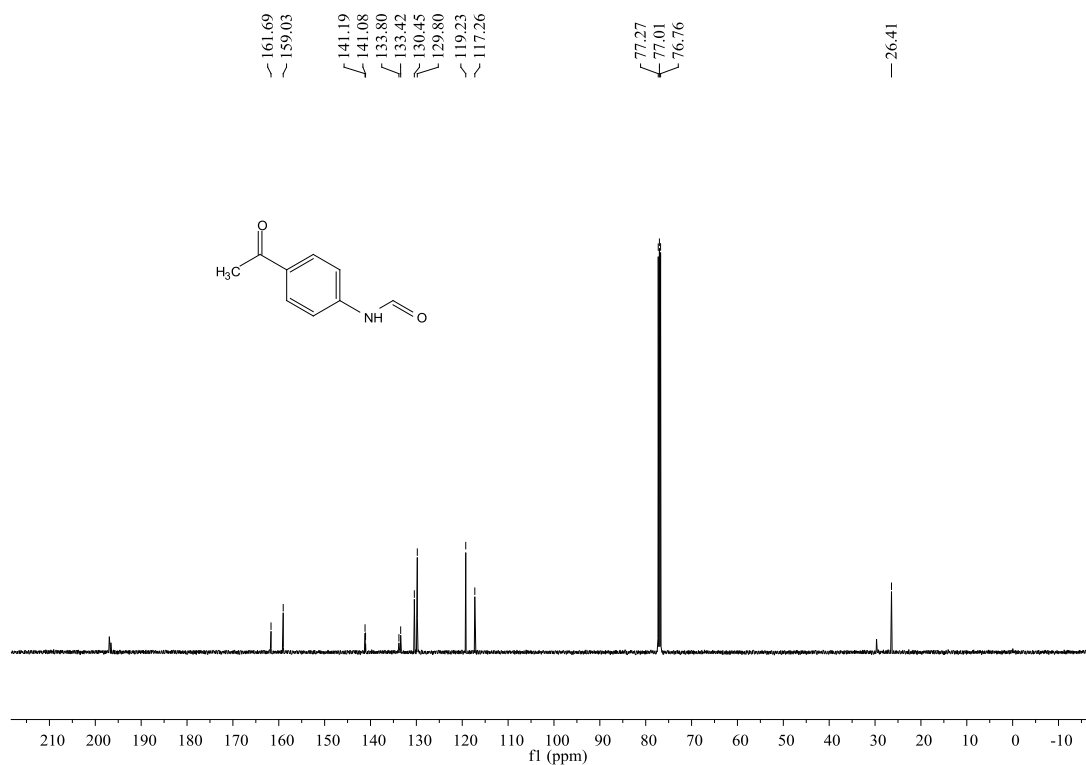

<sup>13</sup>C NMR: *N*-(4-acetylphenyl)formamide (**2j'**)

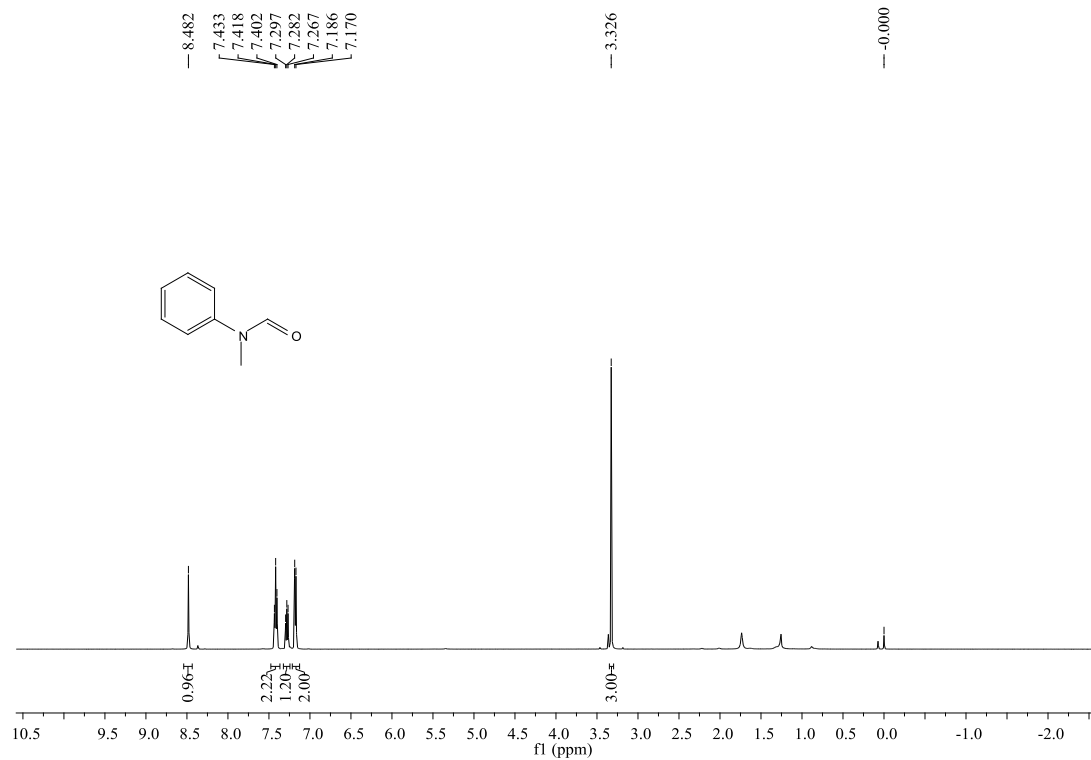

<sup>1</sup>H NMR: *N*-methyl-*N*-phenylformamide (2k')

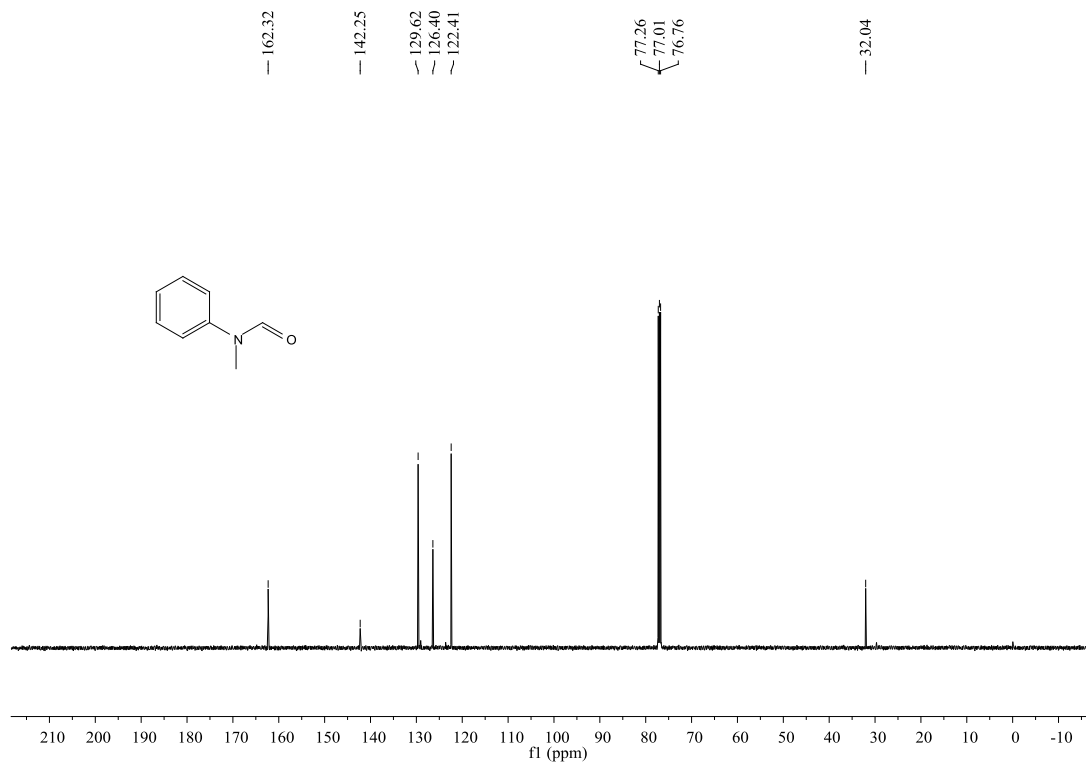

<sup>13</sup>C NMR: *N*-methyl-*N*-phenylformamide (2k')

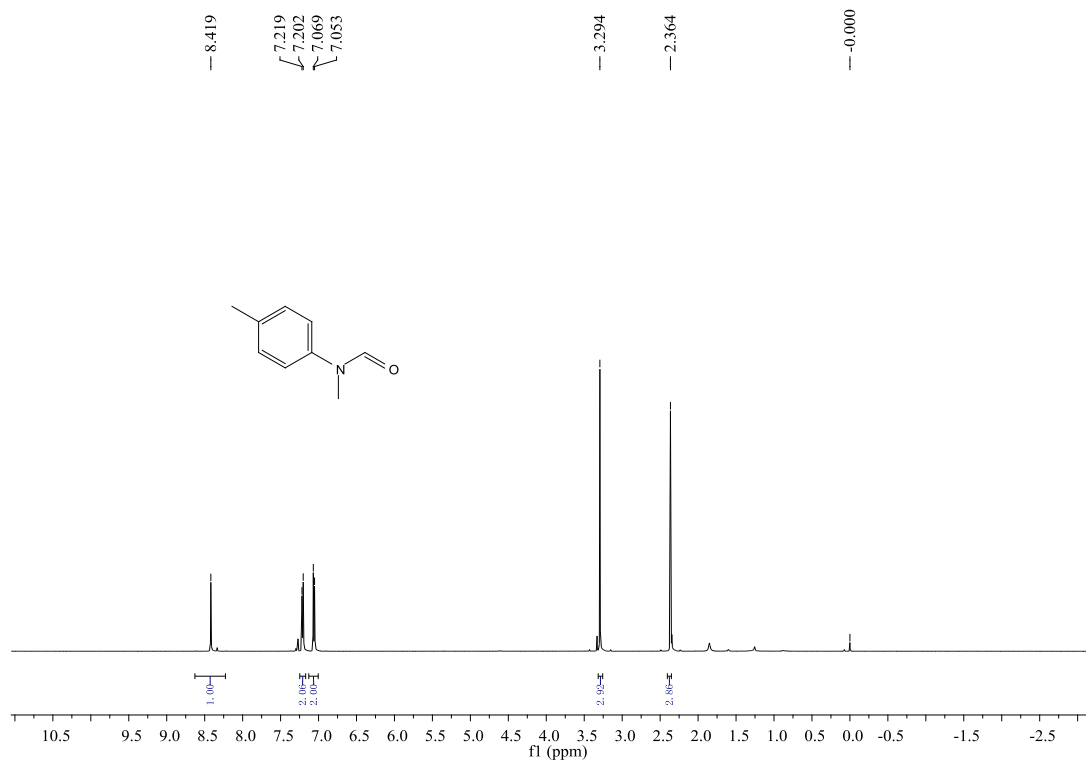

<sup>1</sup>H NMR: *N*-methyl-*N*-(*p*-tolyl)formamide (**2I'**)

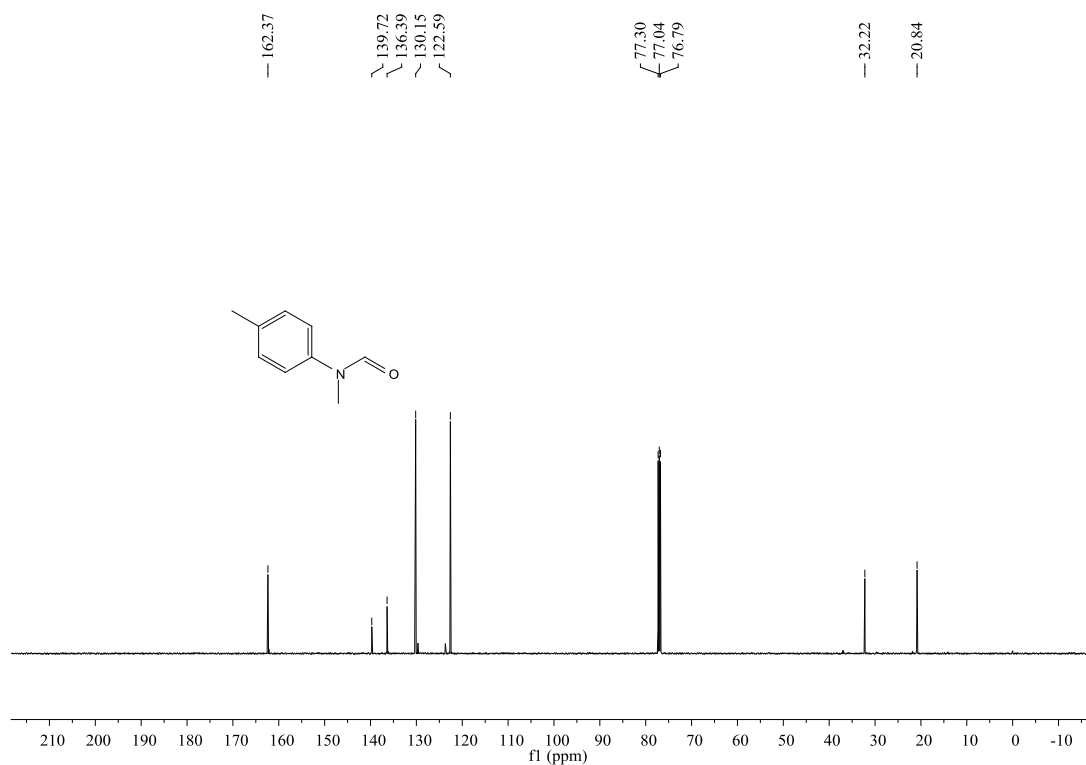

<sup>13</sup>C NMR: *N*-methyl-*N*-(*p*-tolyl)formamide (**2I'**)

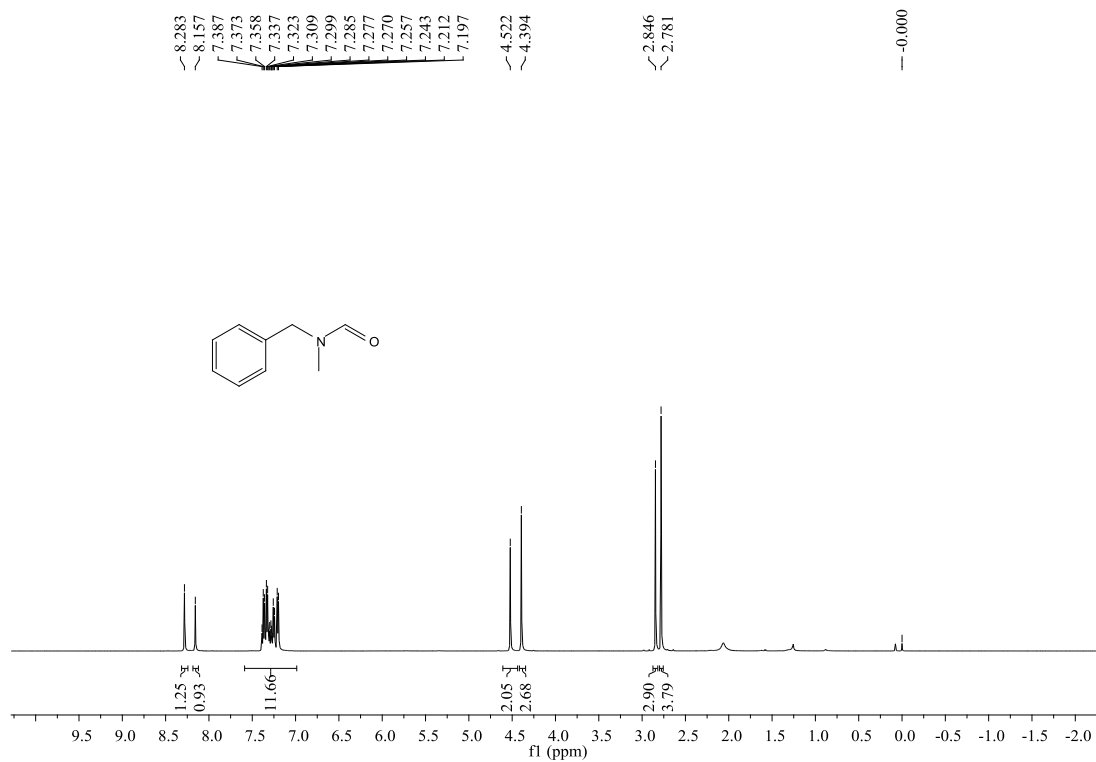

<sup>1</sup>H NMR: *N*-benzyl-*N*-methylformamide (**2m'**)

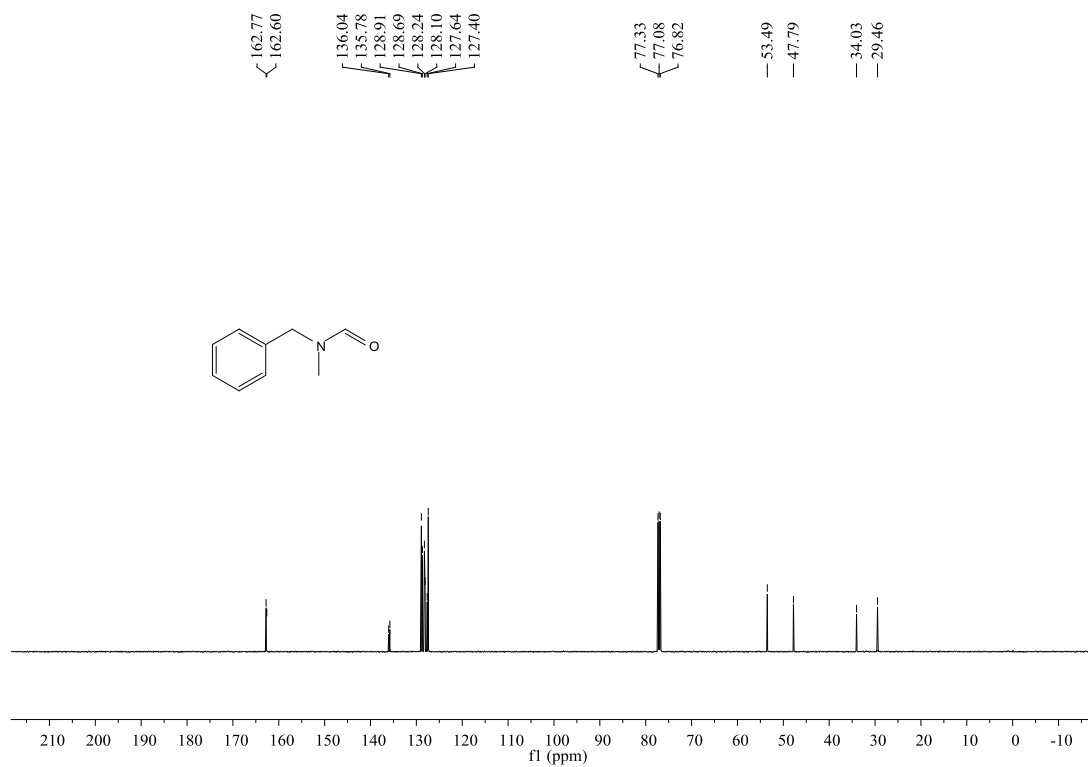

<sup>13</sup>C NMR: *N*-benzyl-*N*-methylformamide(**2m'**)

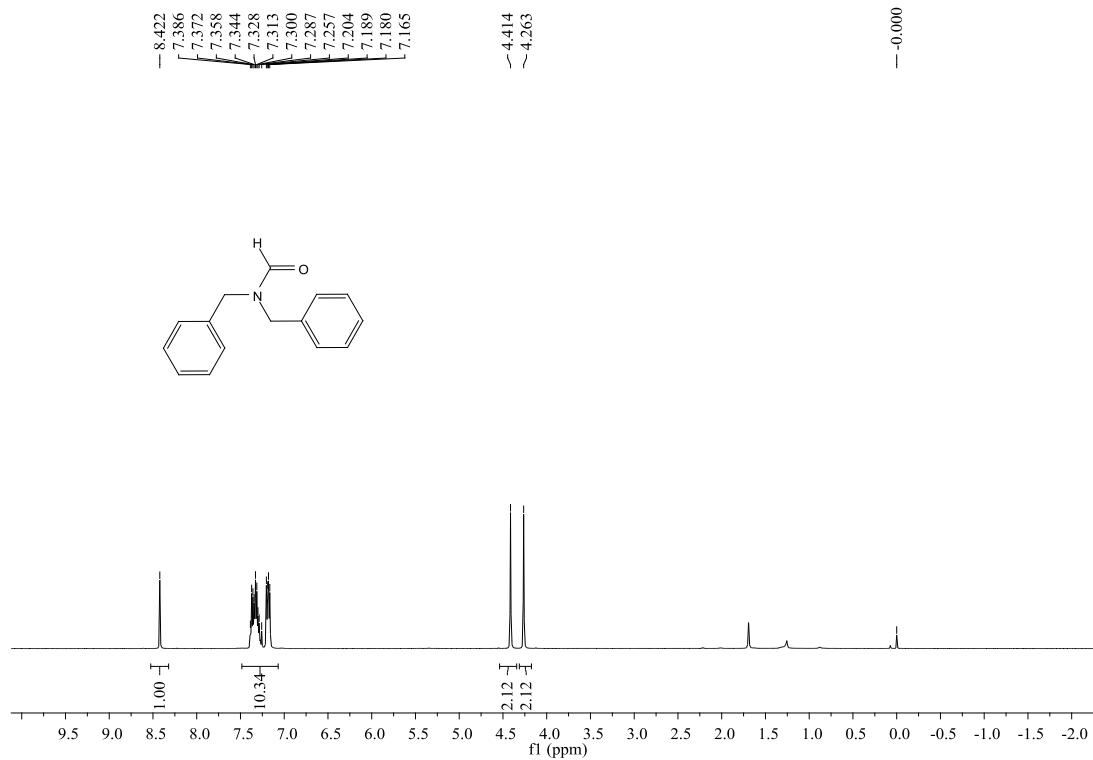

<sup>1</sup>H NMR: *N,N*-dibenzylformamide (**2n'**)

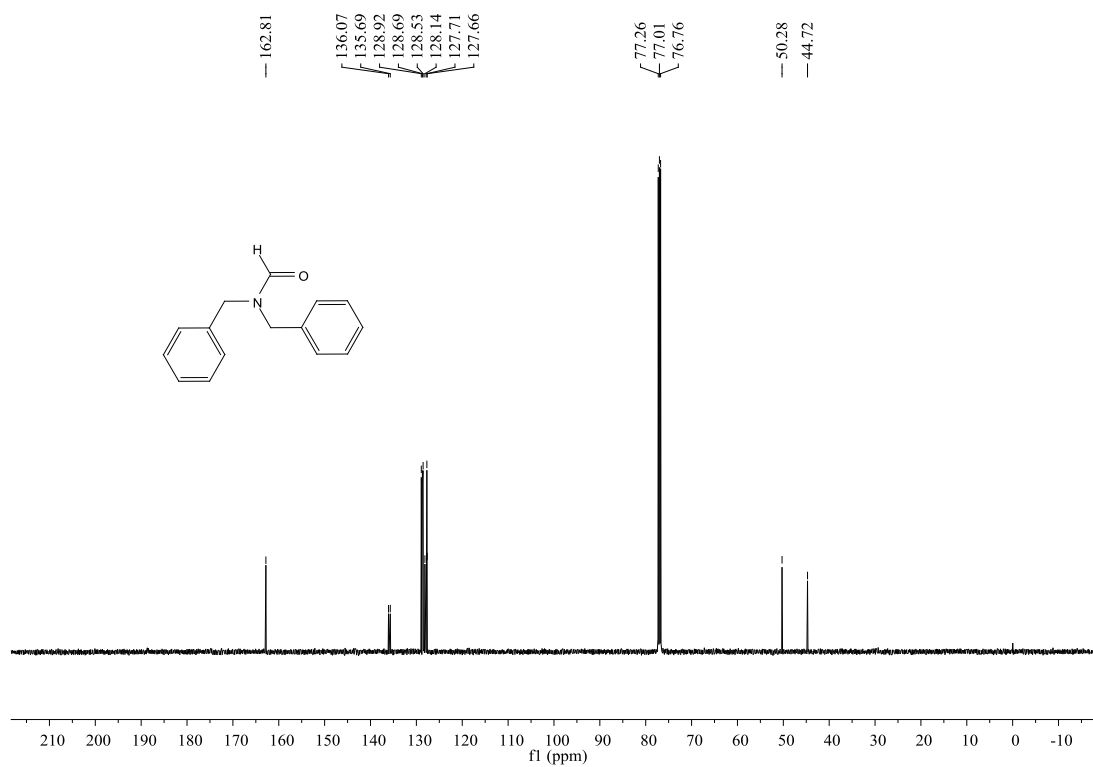

<sup>13</sup>C NMR: *N,N*-dibenzylformamide (**2n'**)

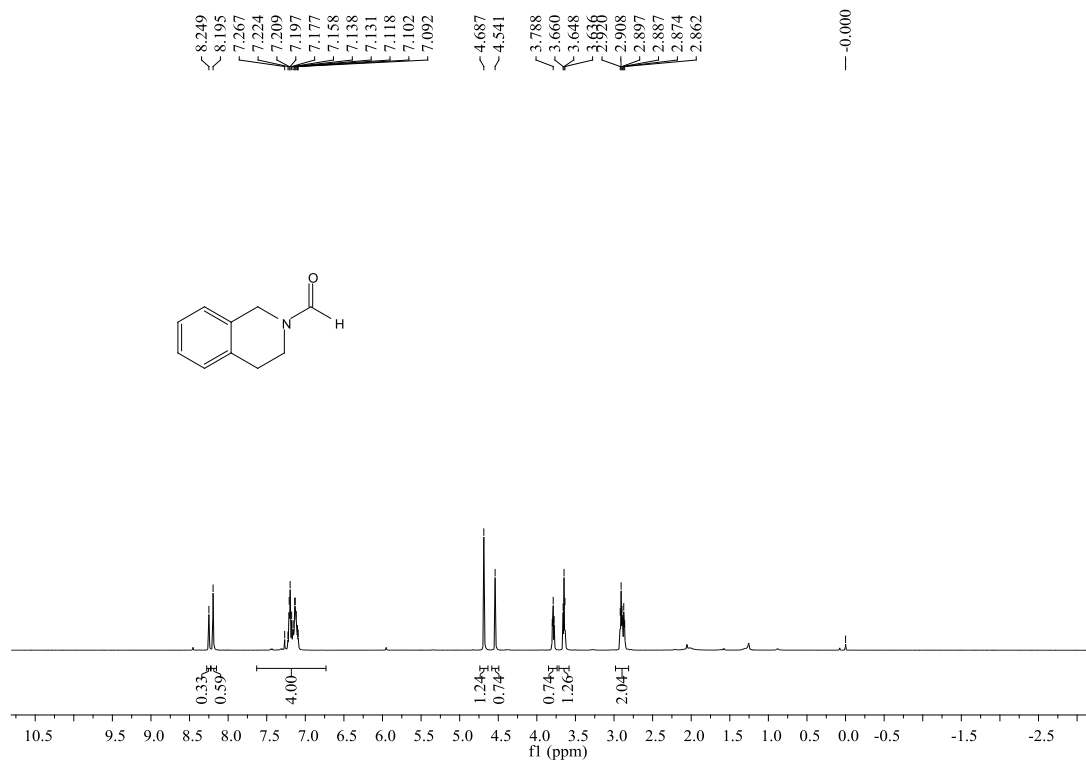

$^1\text{H NMR}$ : 3,4-dihydroisoquinoline-2(1H)-carbaldehyde (**2o'**)

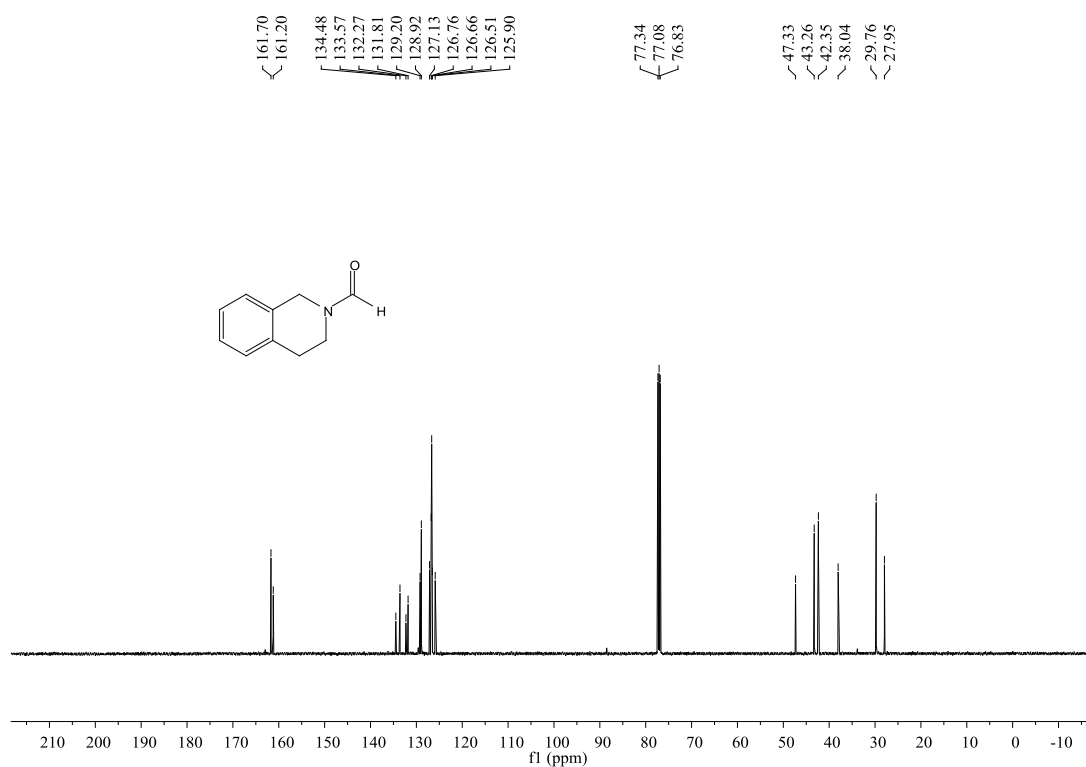

$^{13}\text{C NMR}$ : 3,4-dihydroisoquinoline-2(1H)-carbaldehyde (**2o'**)



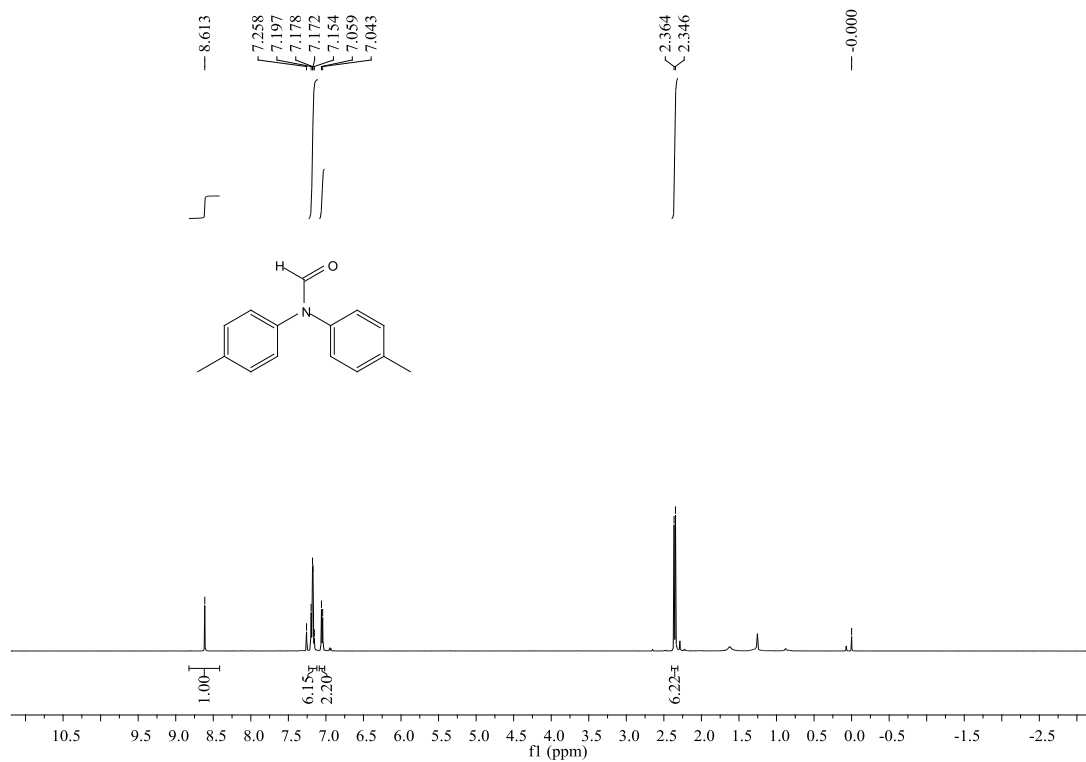

<sup>1</sup>H NMR: *N,N*-di-*p*-tolylformamide (**2q'**)

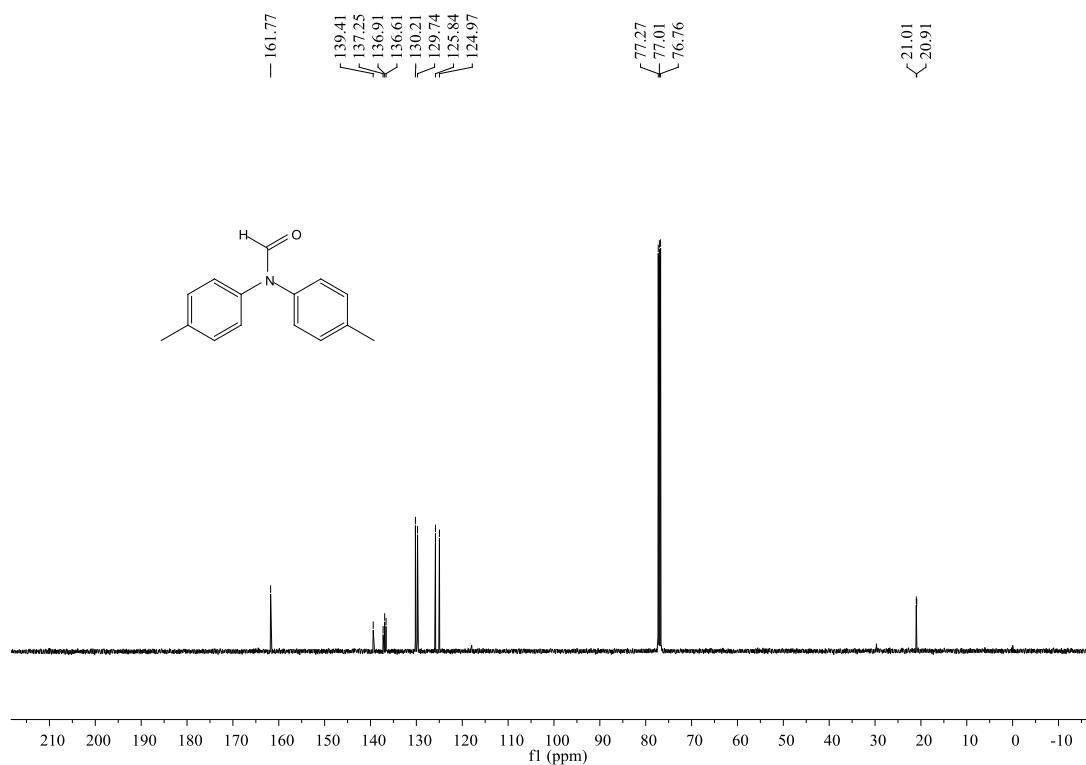

<sup>13</sup>C NMR: *N,N*-di-*p*-tolylformamide (**2q'**)

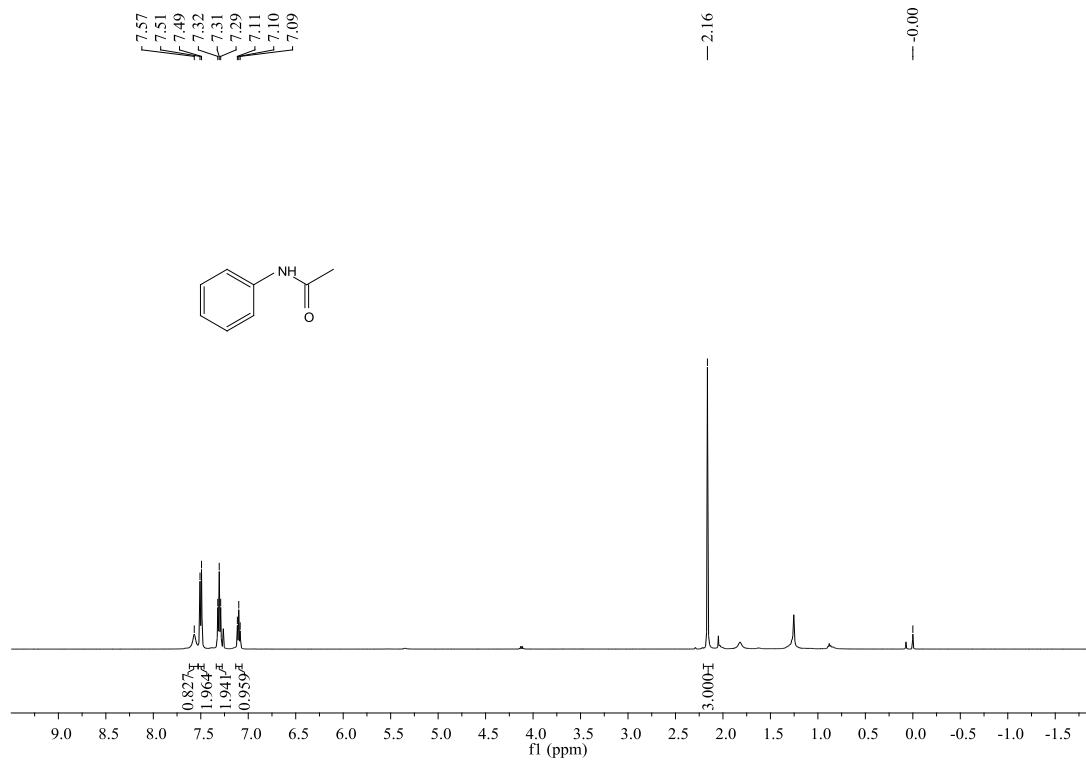

<sup>1</sup>H NMR: *N*-phenylacetamide (**5a**)

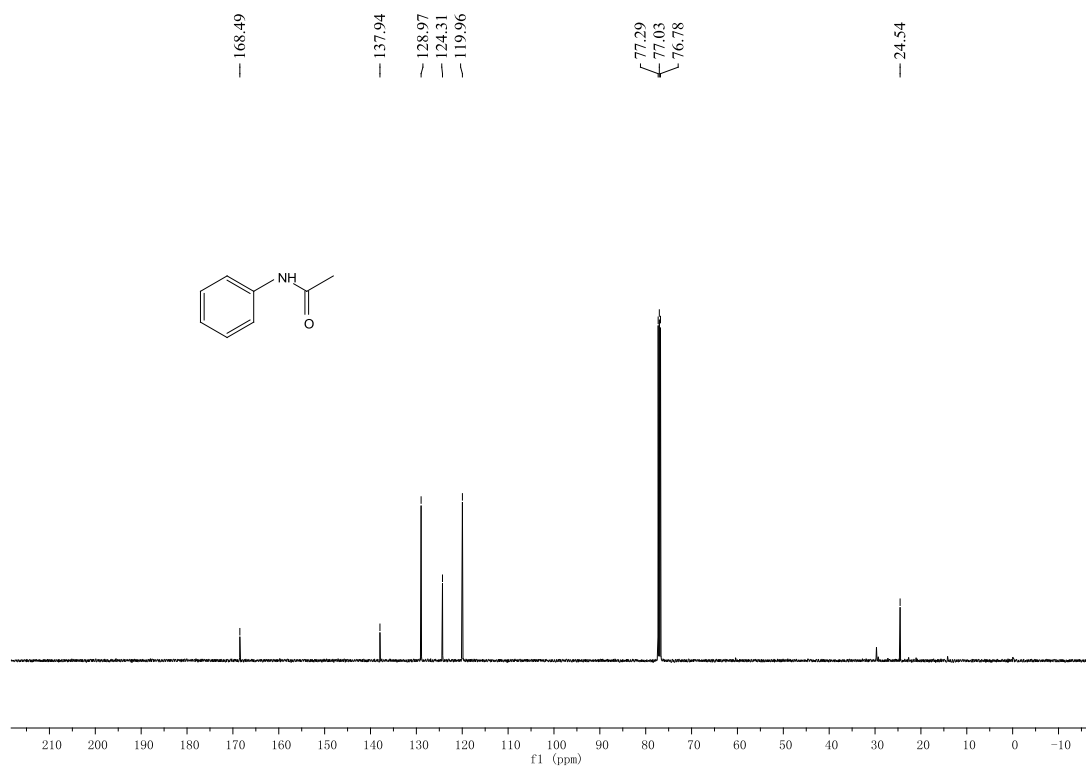

<sup>13</sup>C NMR: *N*-phenylacetamide (**5a**)

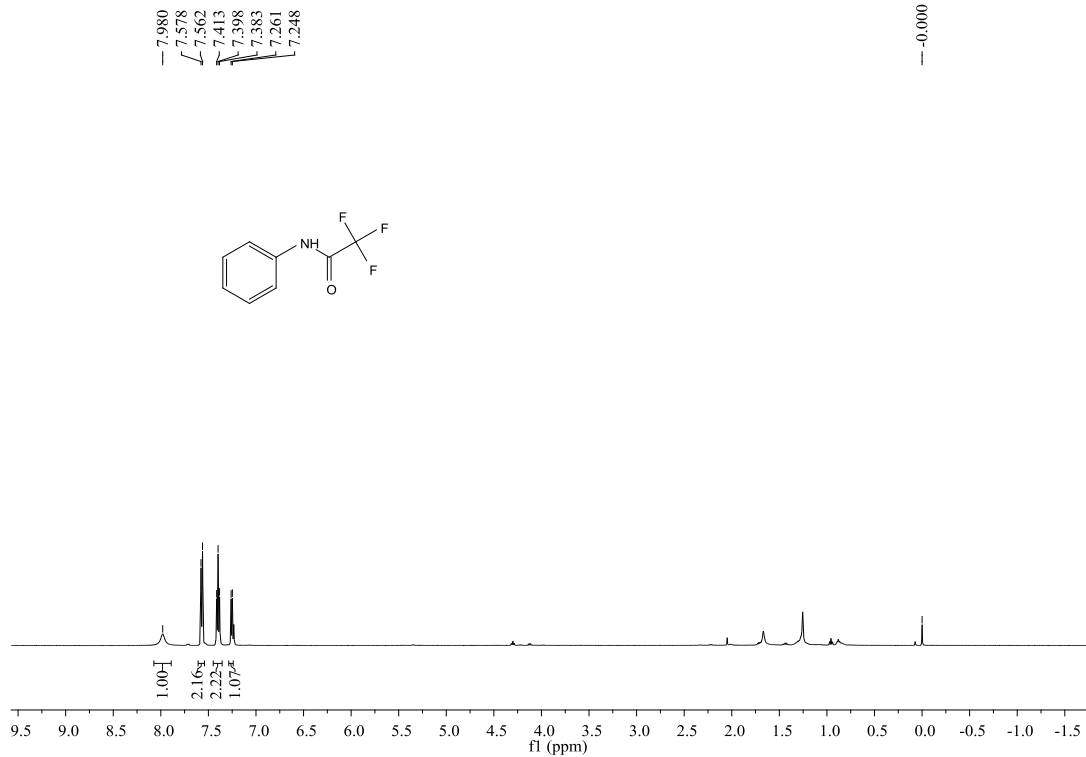

<sup>1</sup>H NMR: 2,2,2-trifluoro-*N*-phenylacetamide (**5b**)

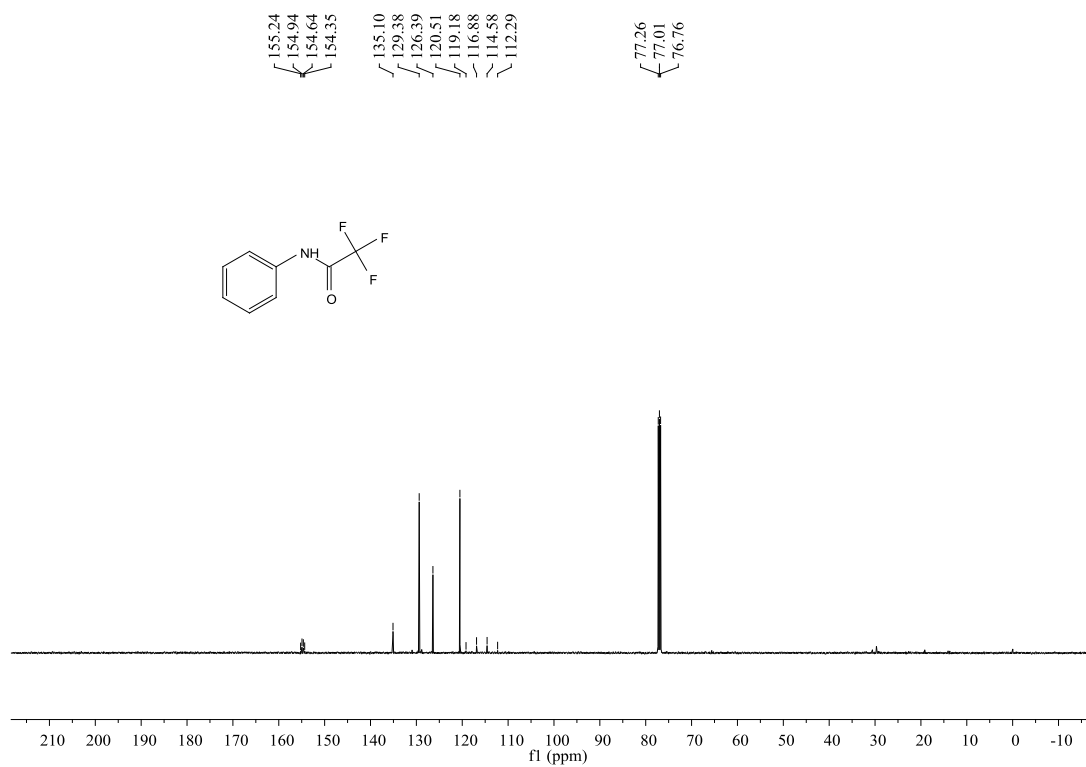

<sup>13</sup>C NMR: 2,2,2-trifluoro-*N*-phenylacetamide (**5b**)

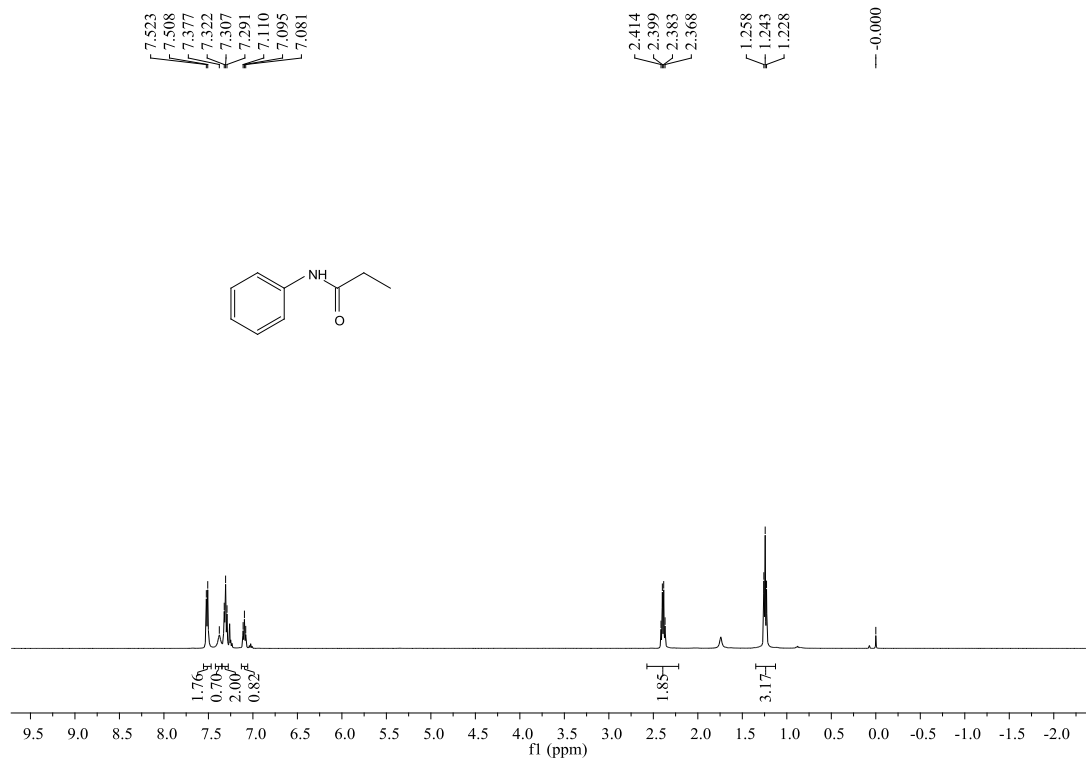

<sup>1</sup>H NMR: *N*-phenylpropionamide (5c)

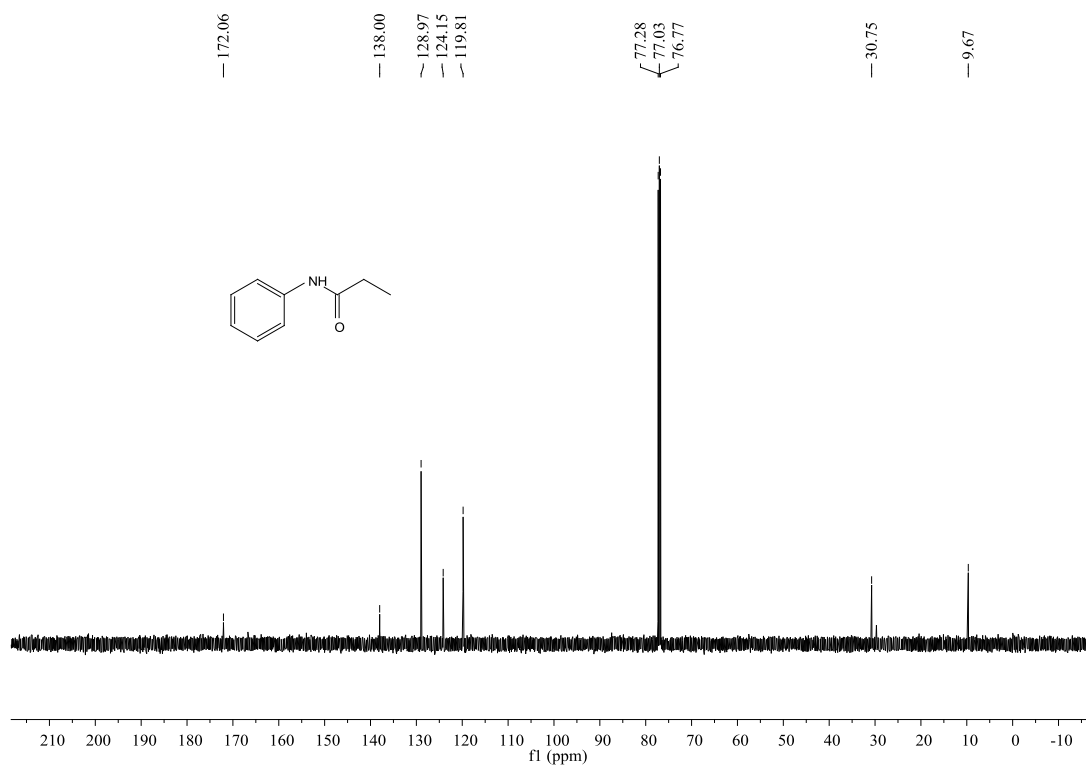

<sup>13</sup>C NMR: *N*-phenylpropionamide (5c)

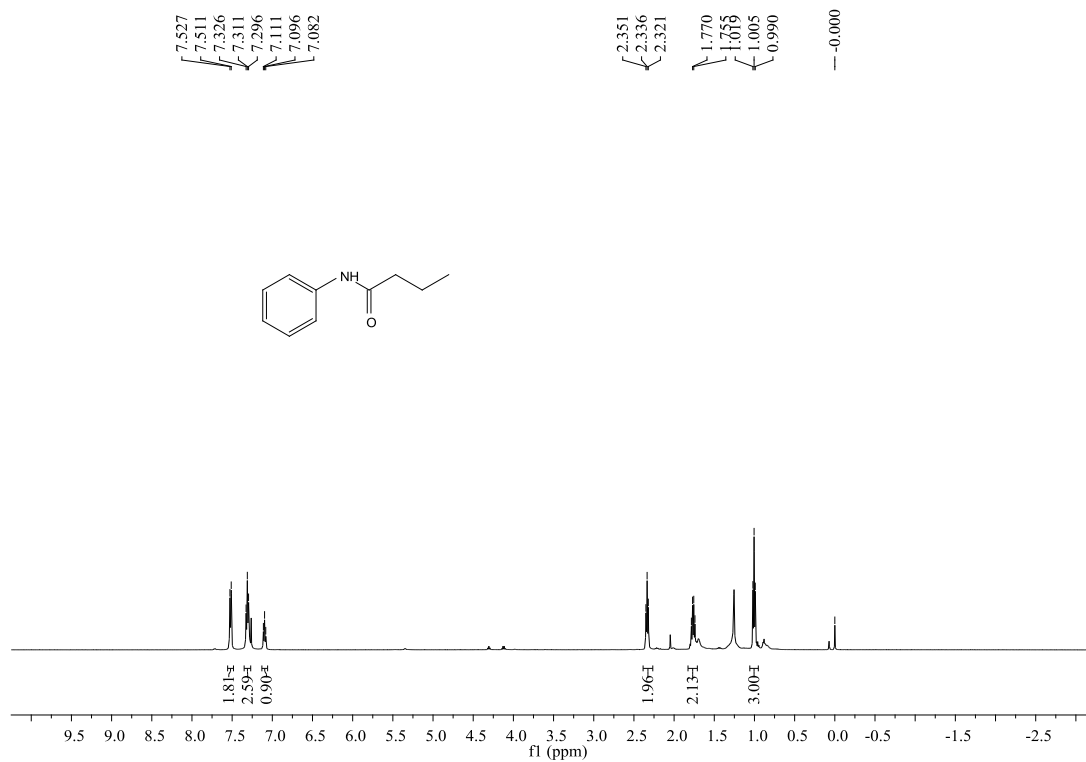

<sup>1</sup>H NMR: *N*-phenylbutyramide (5d)

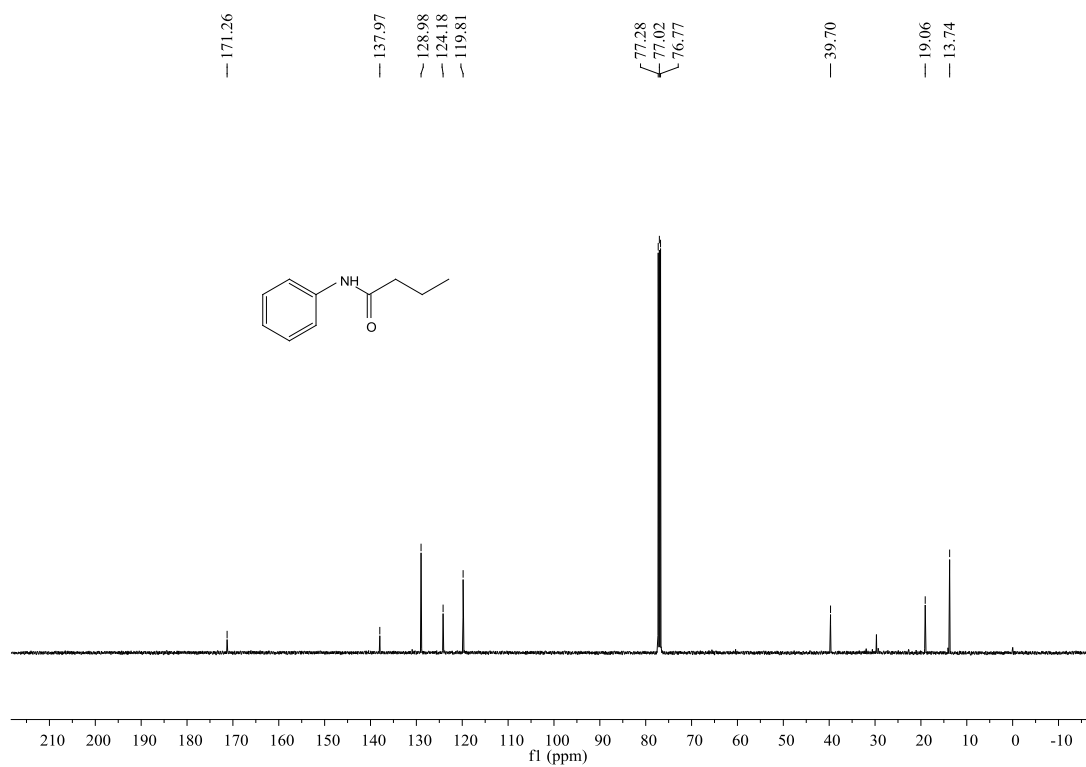

<sup>13</sup>C NMR: *N*-phenylbutyramide (5d)
